# Supplementary material
Source: publisher figshare collection journal article supplement (https://acs.figshare.com/ndownloader/files/11915534)

## Supplementary Information

# Synthesis and Evaluation of Fluoroalkyl Phosphonyl Analogs of 2-C-Methylethanol Phosphate as Substrates and Inhibitors of IspD from Human Pathogens

David Bartee, Michael J. Wheadon, and Caren L. Freel Meyers\*

Department of Pharmacology and Molecular Sciences, The Johns Hopkins University School of Medicine, Baltimore, MD, 21205, United States

\* Please address correspondence to C. Freel Meyers (Tel 410-502-4807; FAX: 410-955-3023; email: [cmeyers@jhmi.edu](mailto:cmeyers@jhmi.edu))

### Table of Contents

|                                                                                                                         | Page      |
|-------------------------------------------------------------------------------------------------------------------------|-----------|
| <b>Figure S1:</b> Regioselectivity of the acid-catalyzed ring-opening of epoxide <b>14</b> .....                        | S2        |
| <b>Figure S2:</b> Full <sup>1</sup> H- <sup>1</sup> H NOE spectrum for <b>21a</b> .....                                 | S3        |
| <b>Figure S3:</b> Full <sup>1</sup> H- <sup>1</sup> H NOE spectrum for <b>21b</b> .....                                 | S5 - S8   |
| <b>Figure S11 – S17:</b> LC-MS Analysis of Analog Turnover by IspD.....                                                 | S9 - S15  |
| <b>Figure S18:</b> Michaelis-Menten Analysis of Analogs as Substrates for <i>E. coli</i> IspD.....                      | S16       |
| <b>Figure S19:</b> Inhibition of IspD orthologs by Analogs.....                                                         | S17       |
| <b>Figure S20:</b> IC <sub>50</sub> Curves for <b>5b</b> against <i>E. coli</i> IspD and <i>P. falciparum</i> IspD..... | S18       |
| <b>Figure S21 – S26:</b> LC-HRMS demonstrating purity of <b>1 – 5a,b</b> .....                                          | S19 – S24 |
| <b>Figure S27:</b> Michaelis-Menten Analysis of Analogs as Substrates for <i>P. falciparum</i> IspD.....                | S25       |
| <b>Figure S28:</b> Overlay of <sup>1</sup> H spectra for diastereomers of phosphonolactone <b>20a</b> .....             | S26       |
| <b>Figure S29:</b> Overlay of <sup>1</sup> H spectra for diastereomers of phosphonolactone <b>20b</b> .....             | S27       |
| <sup>1</sup> H and <sup>13</sup> C NMR spectra for compounds <b>7 – 21a,b</b> .....                                     | S28 - S79 |

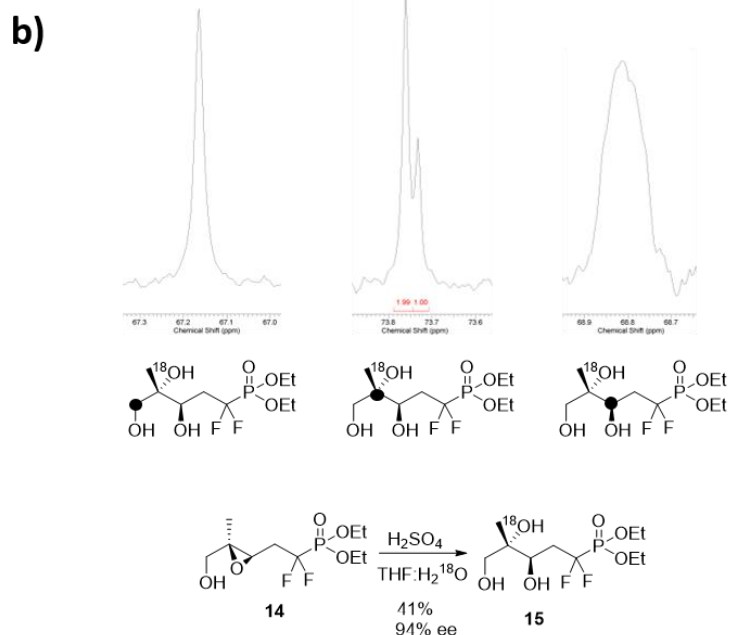

S2

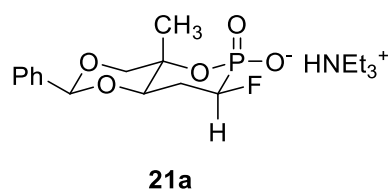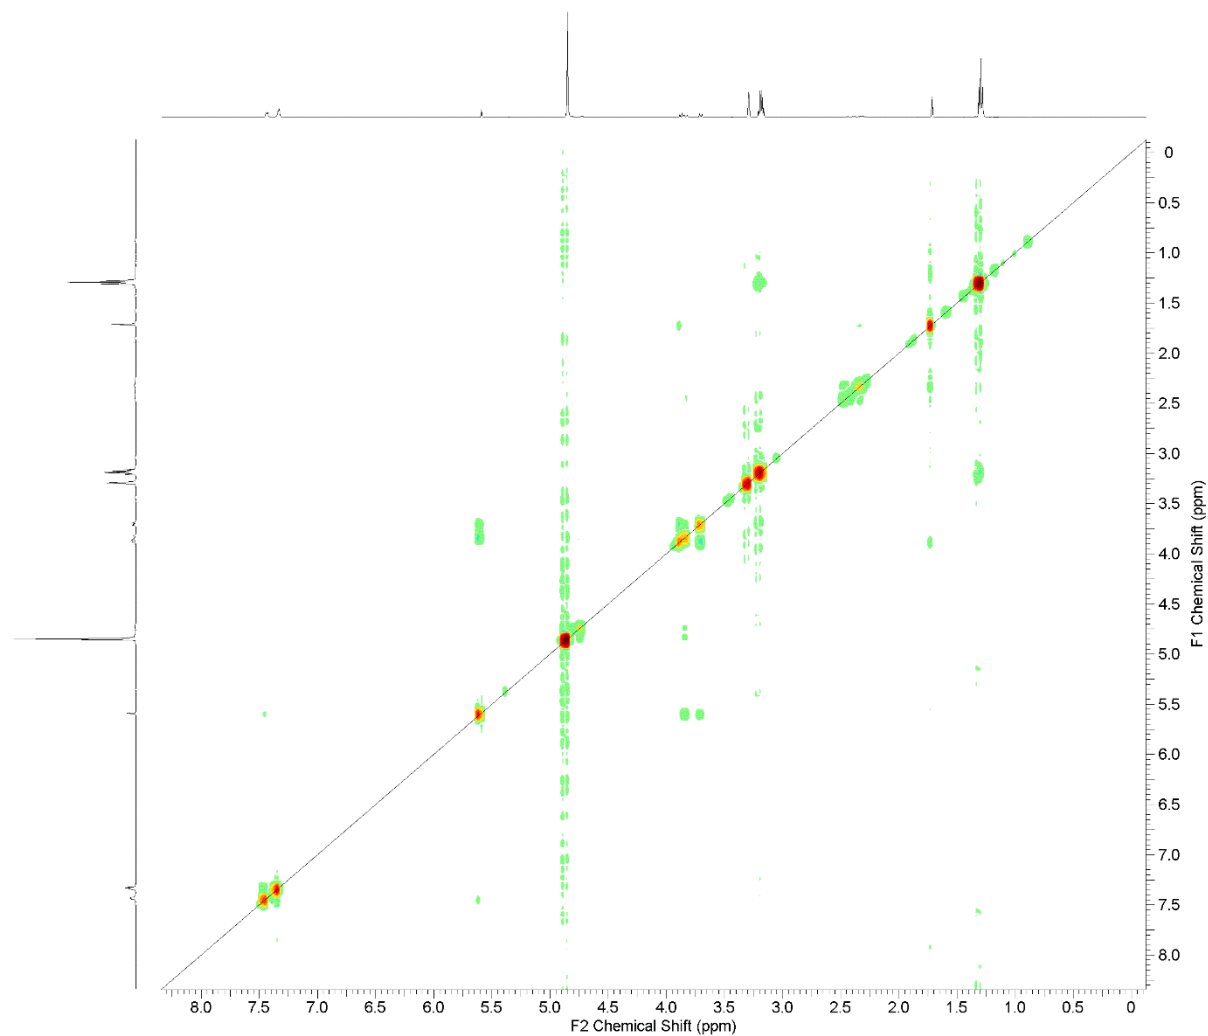

**Figure S2. Full spectrum of the  $^1\text{H}$ - $^1\text{H}$  NOE NMR experiment with 21a.** The full  $^1\text{H}$  NMR spectrum of 21a can be found on page S76.

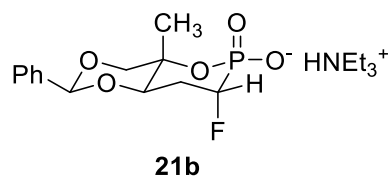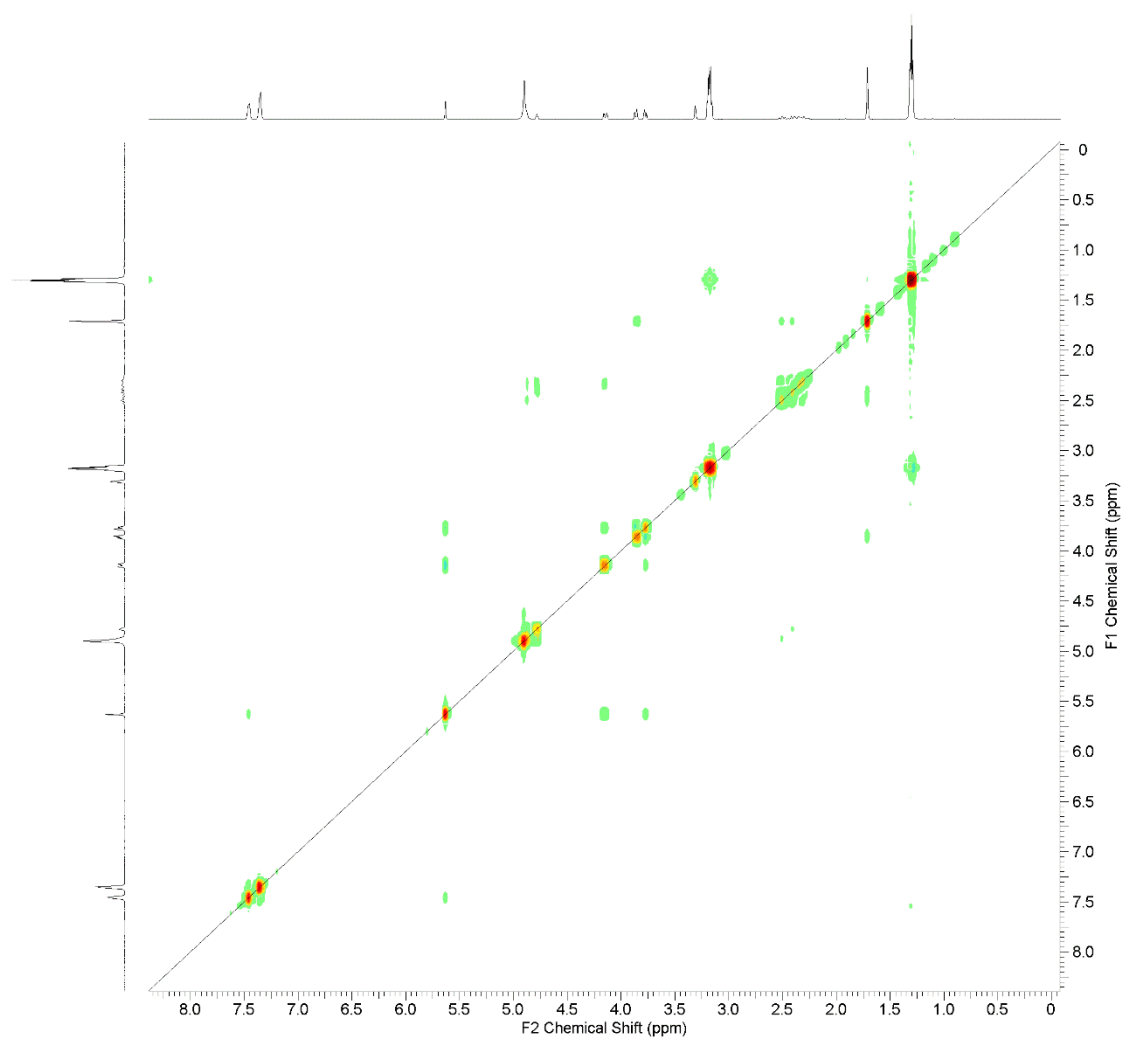

**Figure S3. Full spectrum of the  $^1\text{H}$ - $^1\text{H}$  NOE NMR experiment with 21b.** The full  $^1\text{H}$  NMR spectrum of 21b can be found on page S78.

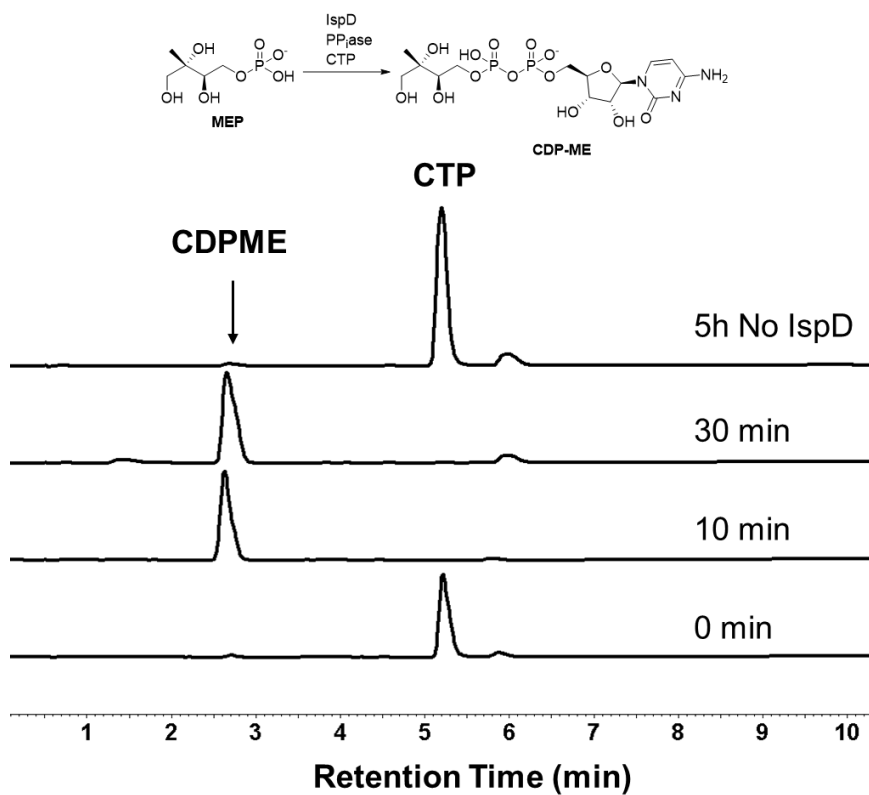

**Figure S4. HPLC analysis of MEP turnover by *E. coli* IspD**

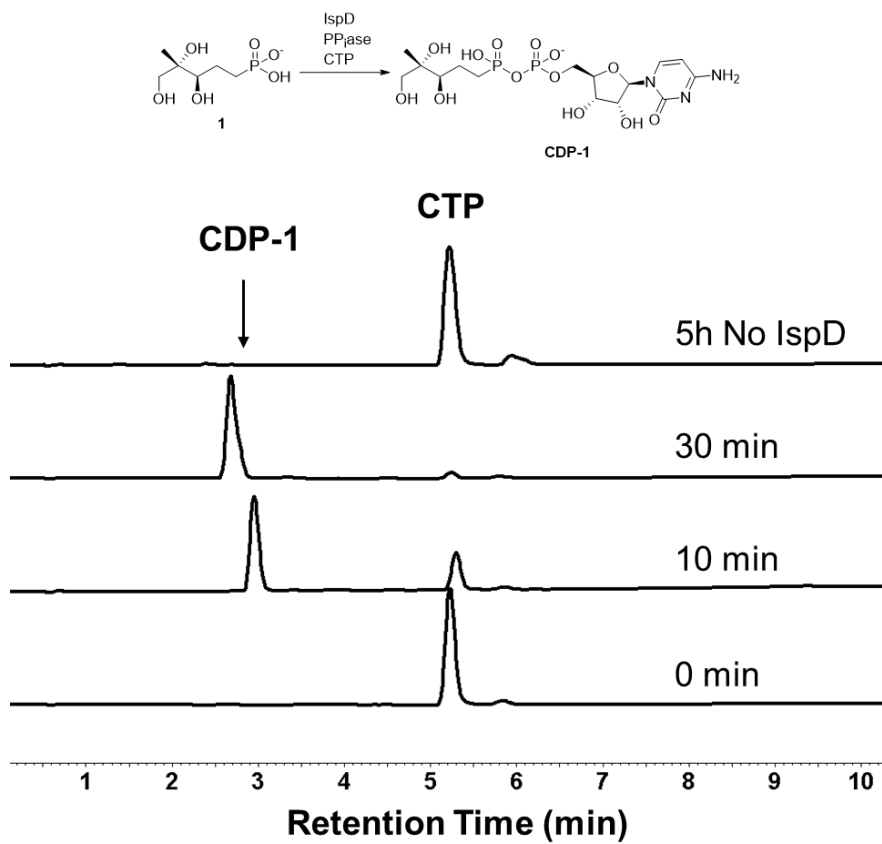

**Figure S5. HPLC analysis of 1 turnover by *E. coli* IspD**

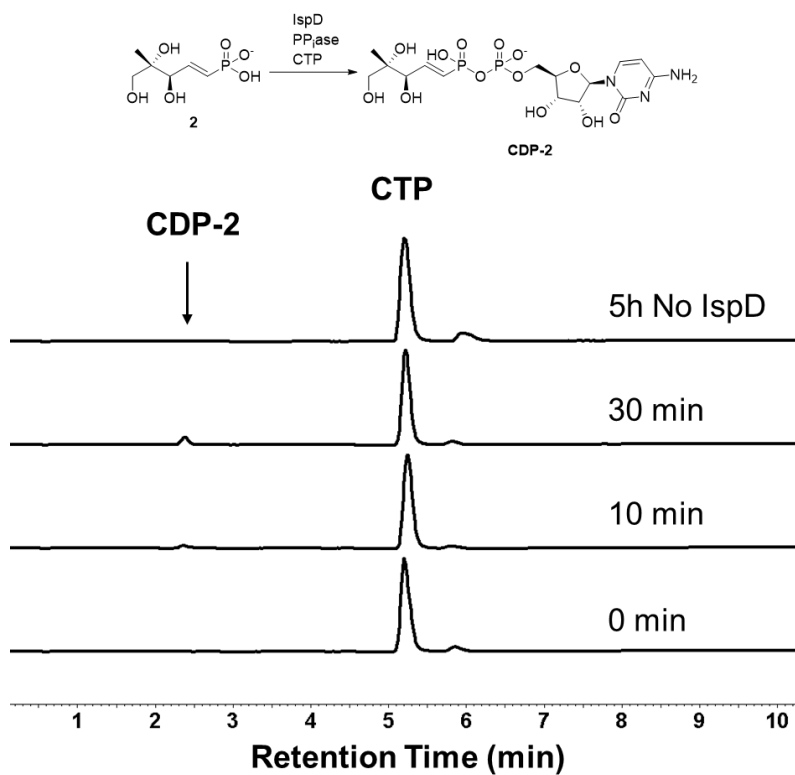

**Figure S6. HPLC analysis of **2** turnover by *E. coli* IspD**

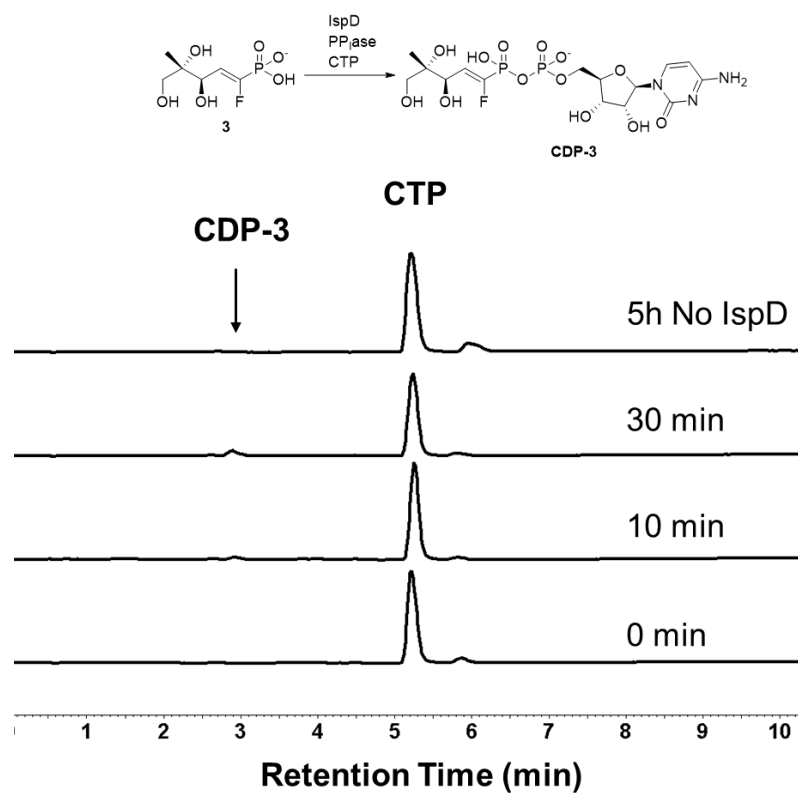

**Figure S7. HPLC analysis of **3** turnover by *E. coli* IspD**

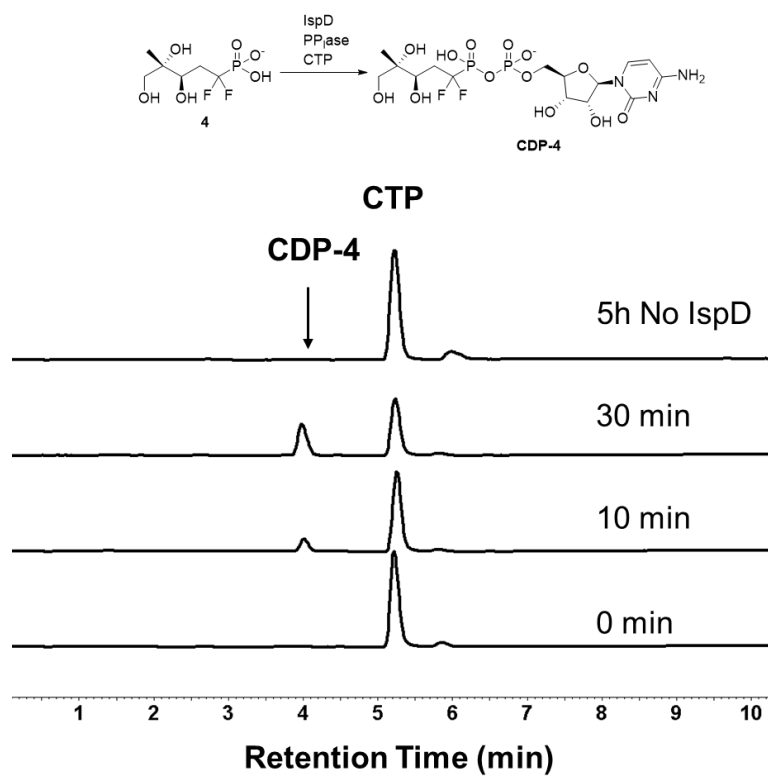

**Figure S8. HPLC analysis of **4** turnover by *E. coli* IspD**

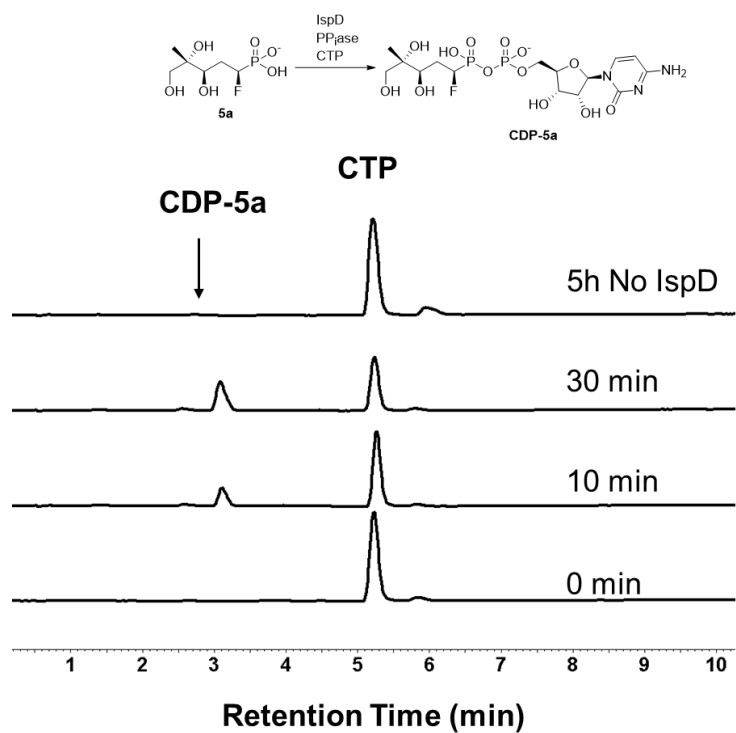

**Figure S9. HPLC analysis of **5a** turnover by *E. coli* IspD**

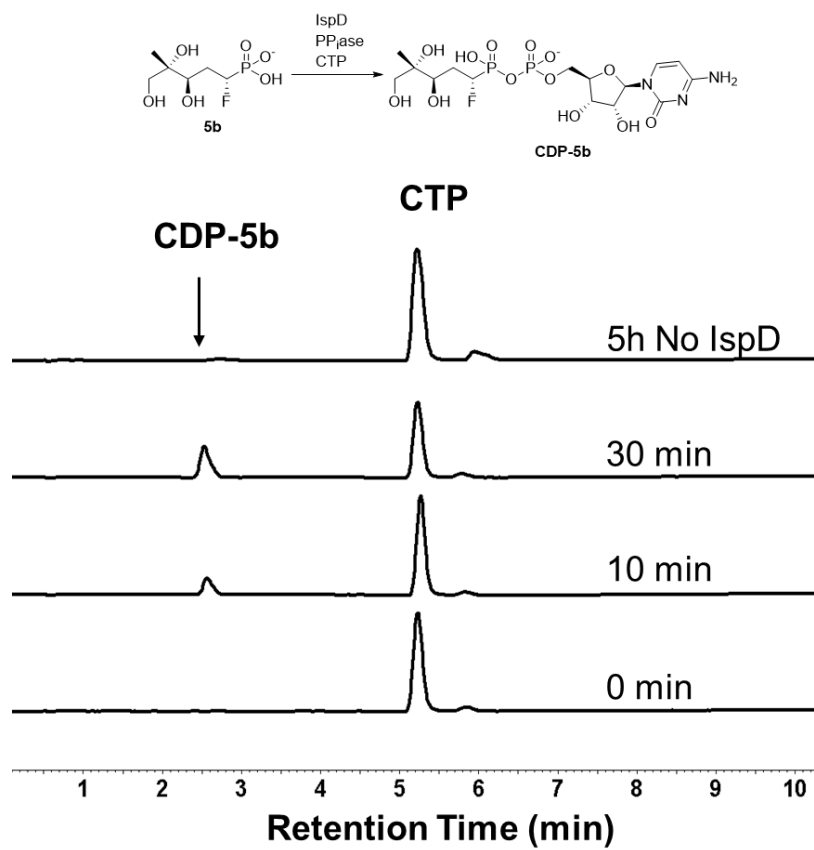

Figure S10. HPLC analysis of 5b turnover by *E. coli* IspD

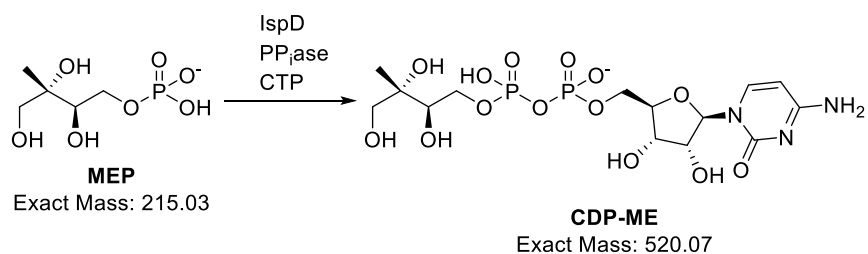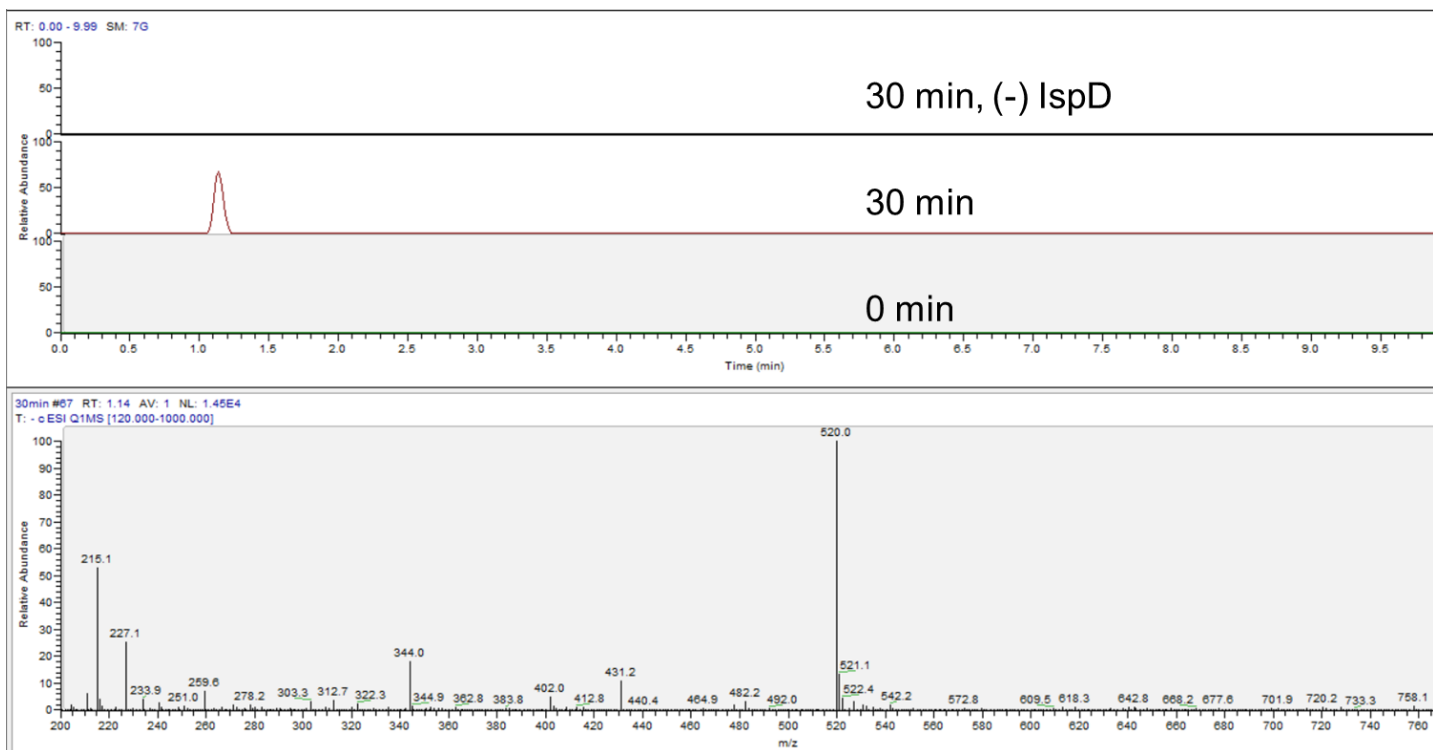

**Figure S11. LC-MS analysis of MEP turnover.** Chromatograms display the total ion count (TIC) for scans containing an ion with an  $m/z$  of 520 corresponding to **CDPME**. The mass spectrum is the scan at the center of the peak in the 30 min sample.

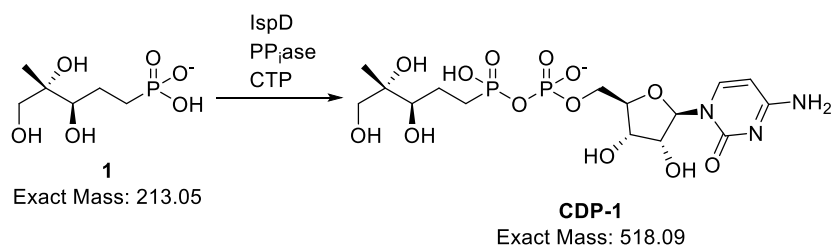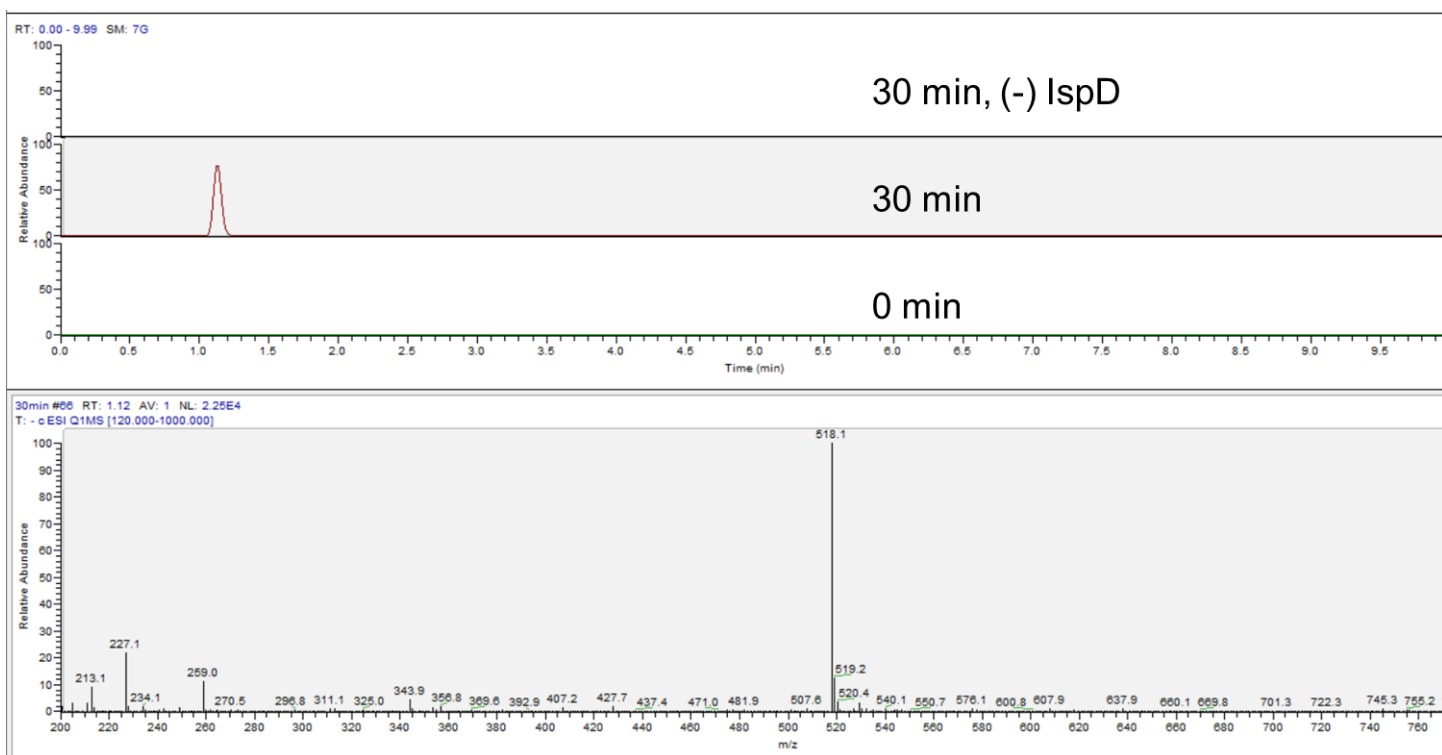

**Figure S12. LC-MS analysis of 1 turnover.** Chromatograms display the total ion count (TIC) for scans containing an ion with an  $m/z$  of 518 corresponding to the **CDP-1** product. The mass spectrum is the scan at the center of the peak in the 30 min sample.

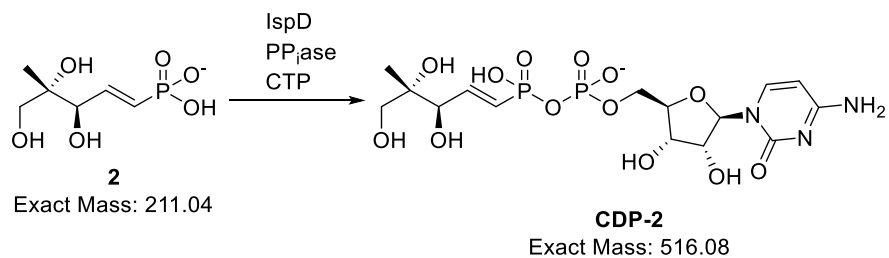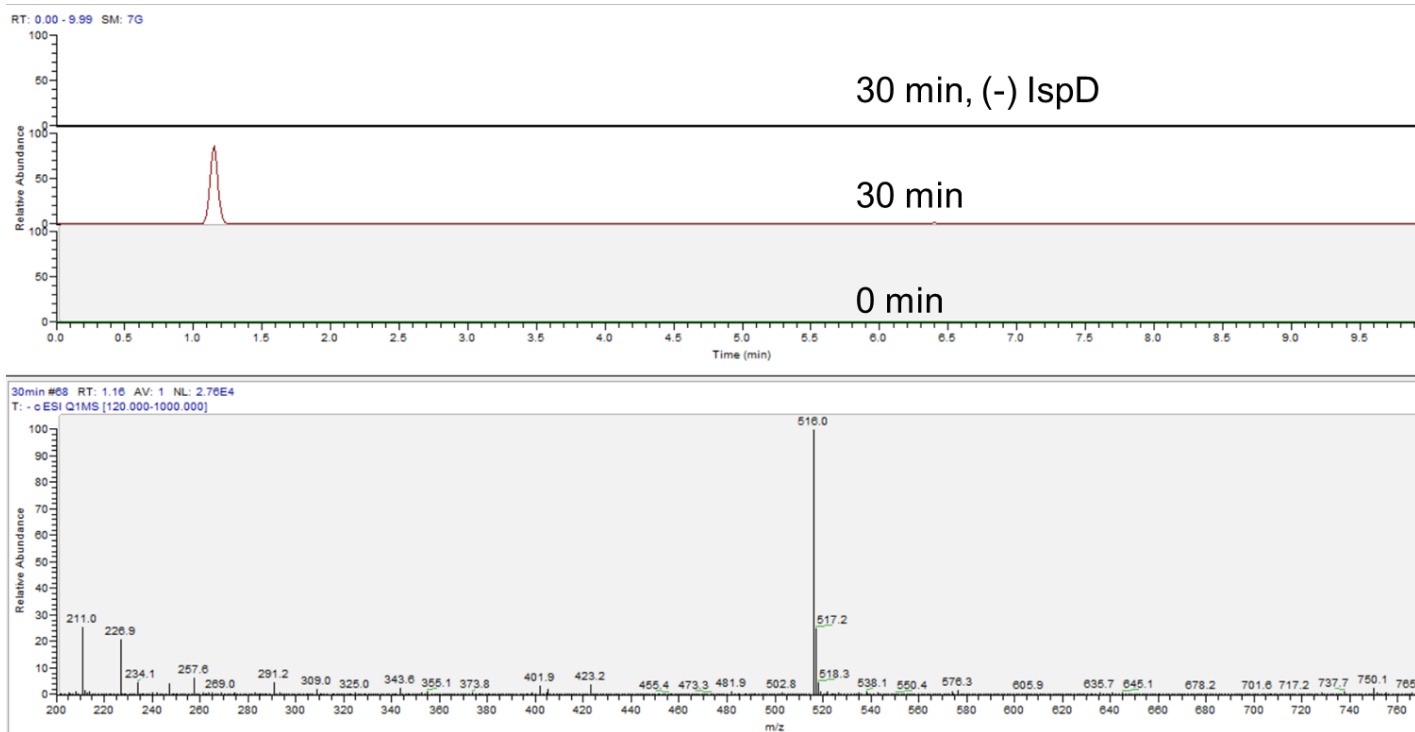

**Figure S13. LC-MS analysis of 2 turnover.** Chromatograms display the total ion count (TIC) for scans containing an ion with an  $m/z$  of 516 corresponding to the **CDP-2** product. The mass spectrum is the scan at the center of the peak in the 30 min sample.

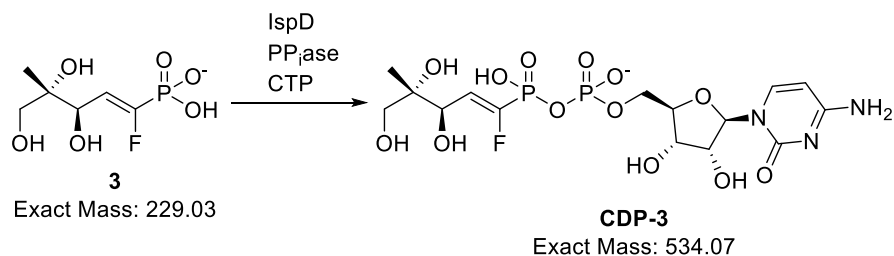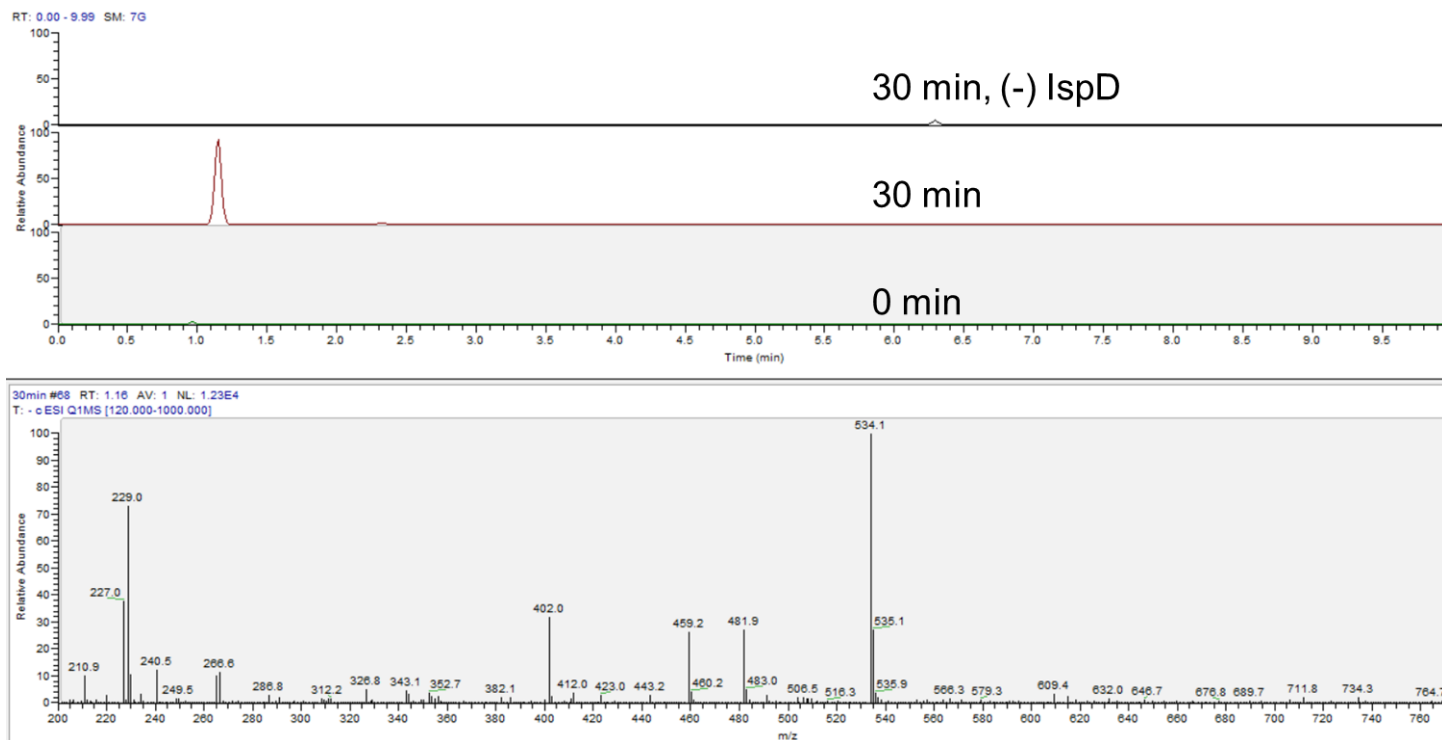

**Figure S14. LC-MS analysis of 1 turnover.** Chromatograms display the total ion count (TIC) for scans containing an ion with an  $m/z$  of 534 corresponding to the **CDP-3** product. The mass spectrum is the scan at the center of the peak in the 30 min sample.

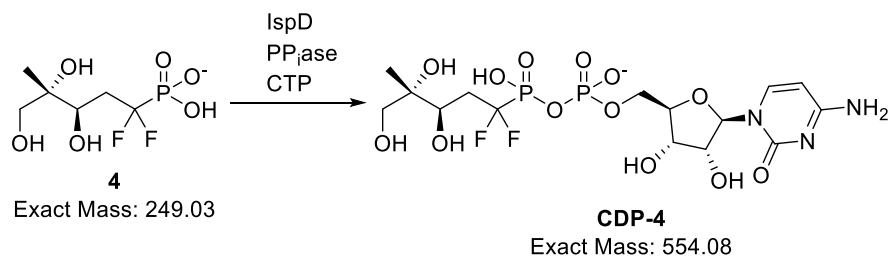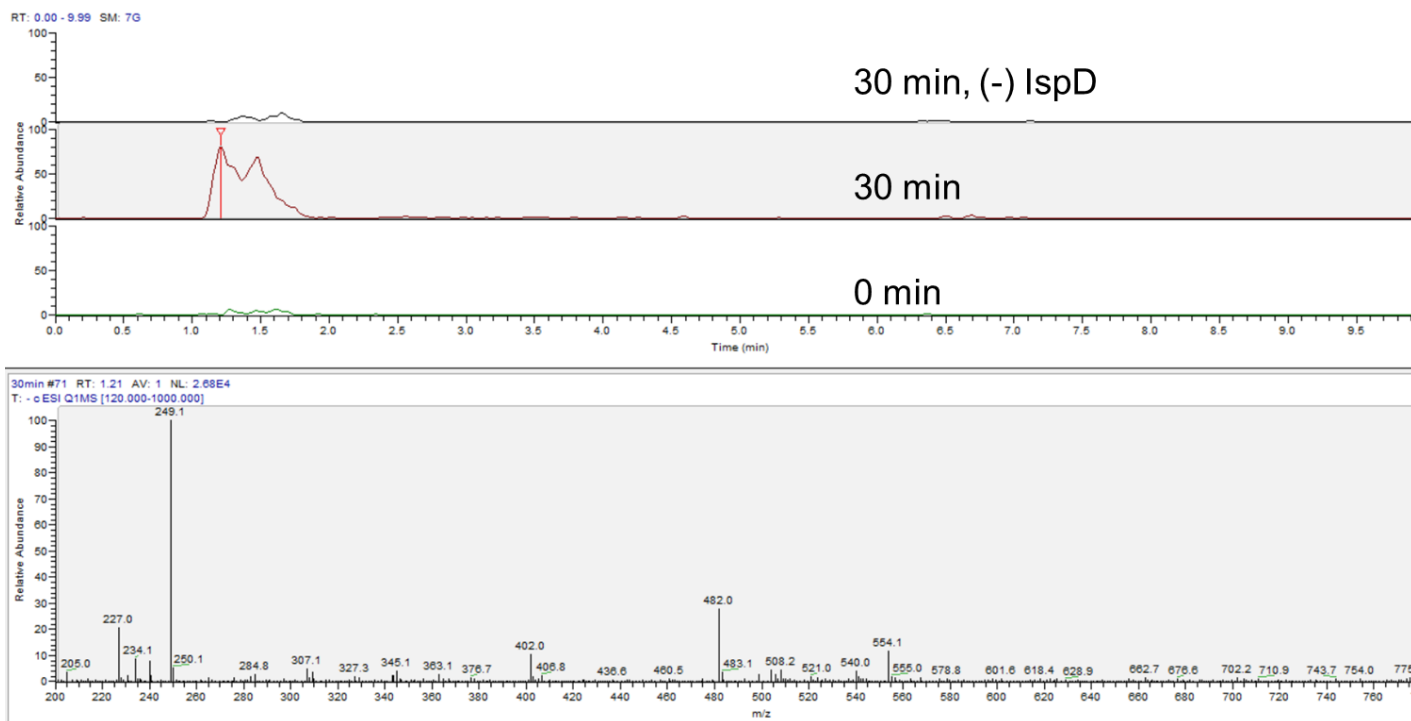

**Figure S15. LC-MS analysis of 4 turnover.** Chromatograms display the total ion count (TIC) for scans containing an ion with an  $m/z$  of 554 corresponding to the **CDP-4** product. The mass spectrum is the scan at 1.21 min (indicated by the red line) in the 30 min sample.

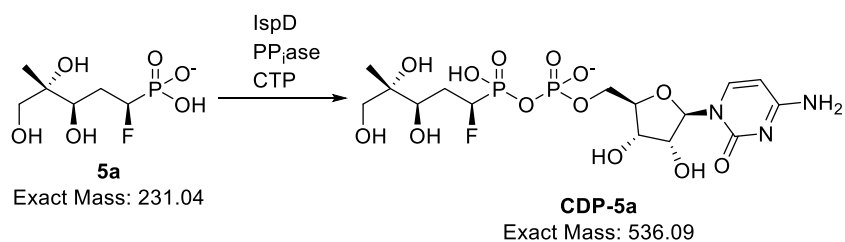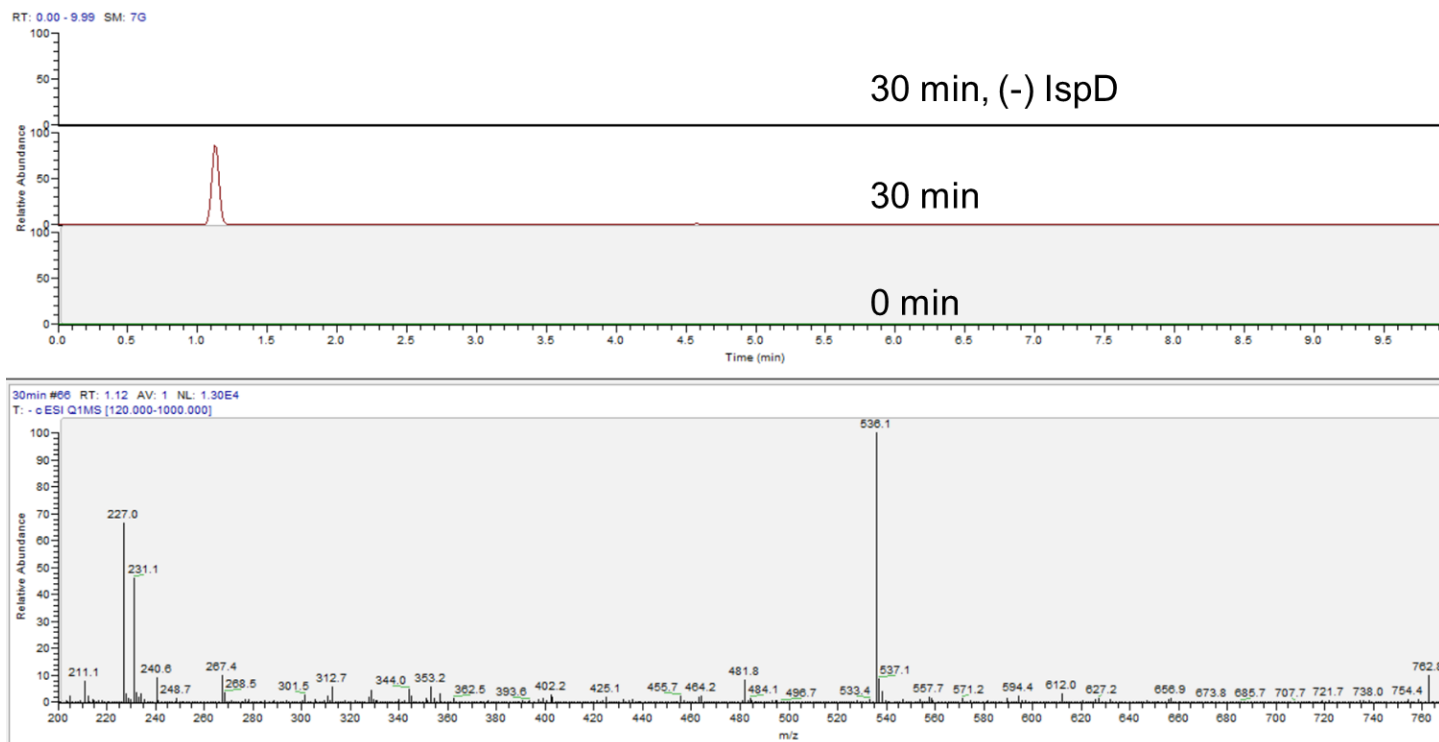

**Figure S16. LC-MS analysis of 5a turnover.** Chromatograms display the total ion count (TIC) for scans containing an ion with an  $m/z$  of 536 corresponding to the **CDP-5a** product. The mass spectrum is the scan at the center of the peak in the 30 min sample.

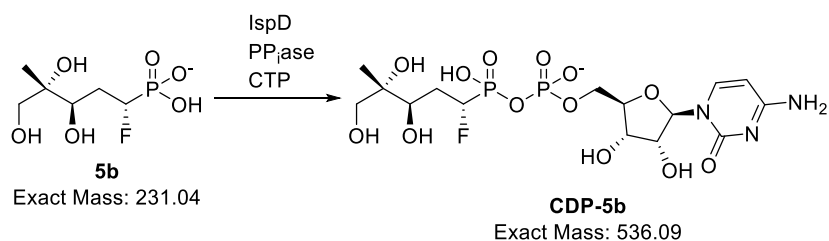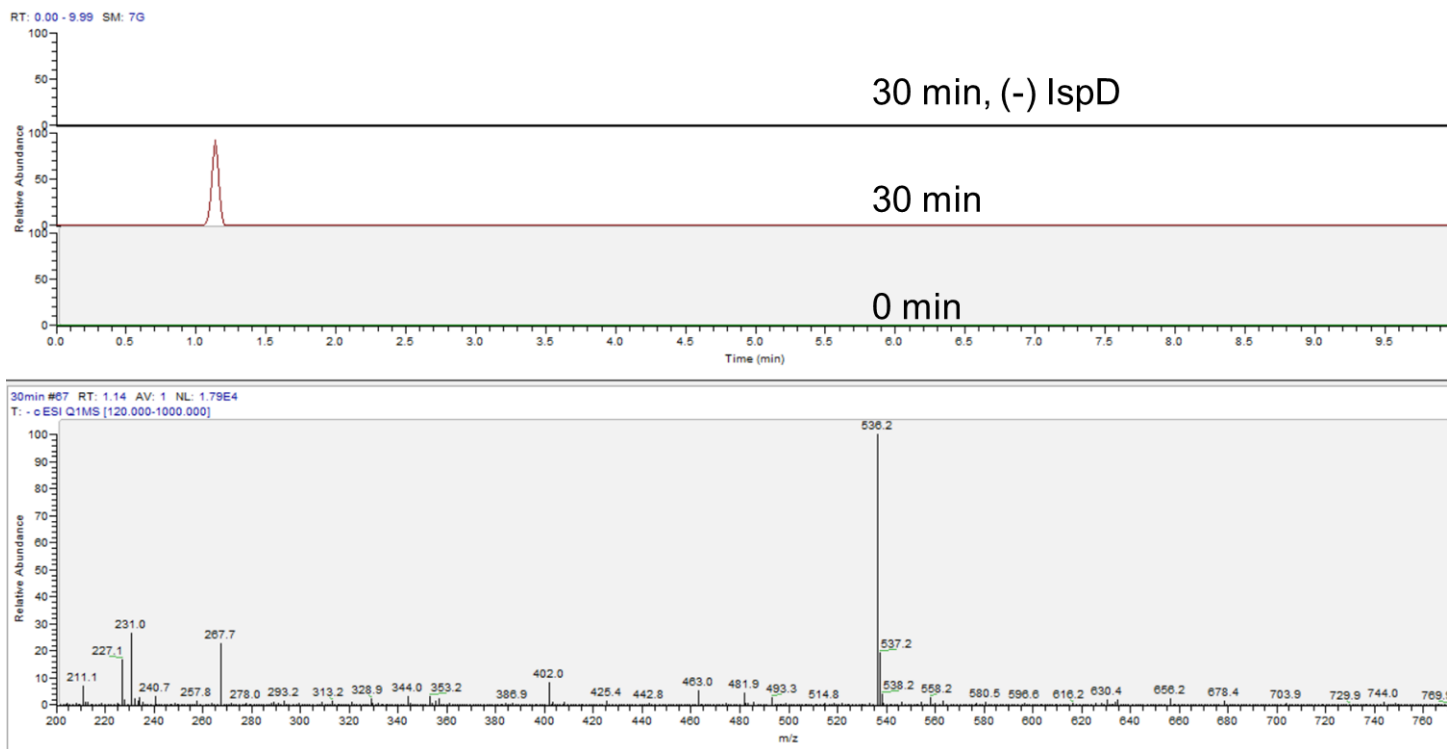

**Figure S17. LC-MS analysis of 5a turnover.** Chromatograms display the total ion count (TIC) for scans containing an ion with an  $m/z$  of 536 corresponding to the **CDP-5b** product. The mass spectrum is the scan at the center of the peak in the 30 min sample.

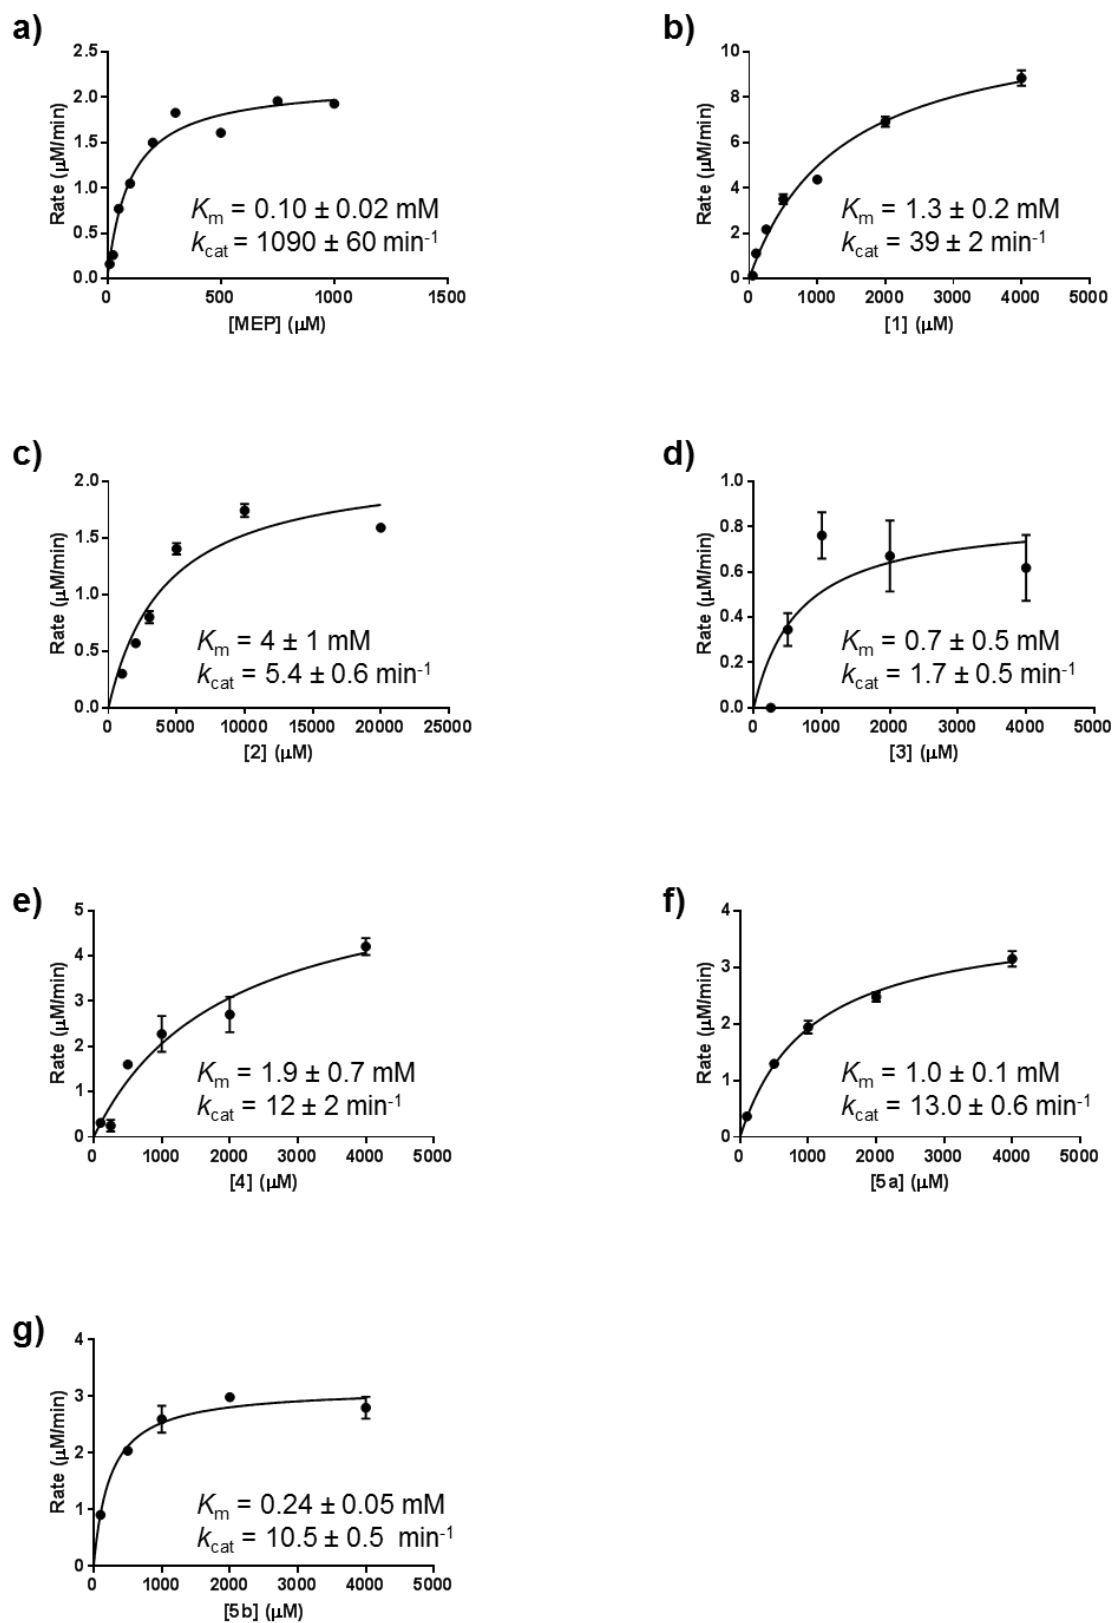

**Figure S18. Michaelis-Menten plots for MEP and analogs 1 – 5a,b with *E. coli* IspD.**

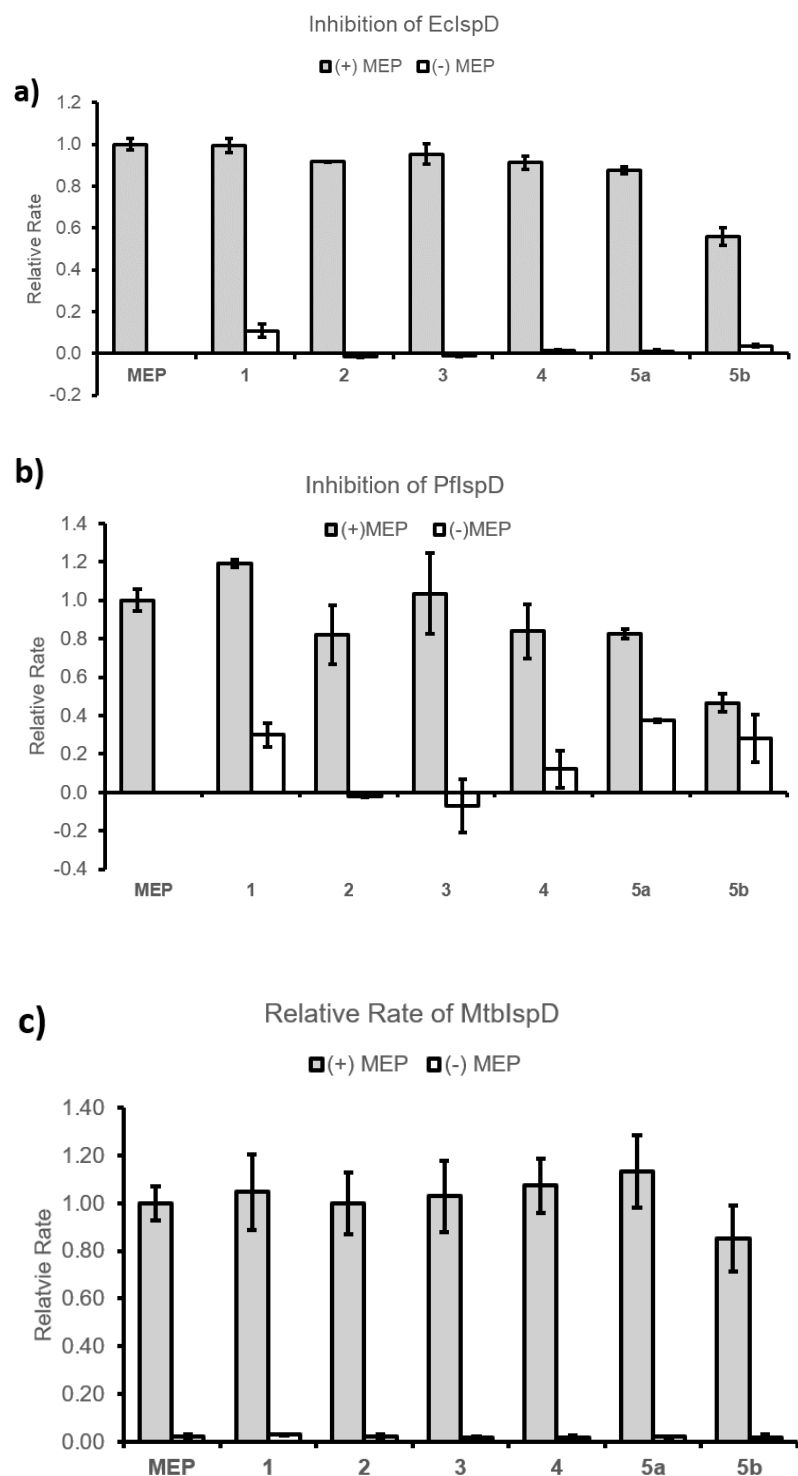

**Figure S19. Evaluation of inhibitory activity of analogs 1 – 5a,b against a) *E. coli*, b) *P. falciparum*, and c) *M. tuberculosis* IspD.** The white (-) MEP bars indicate control experiments where MEP was excluded from the reaction mixture in order to determine if the observed rates were being significantly influenced by analog turnover. In the *P. falciparum* experiments testing analogs **1**, **5a** and **5b**, analog turnover appeared to be non-negligible prompting the evaluation of these analogs as substrates (see below, figure S27).

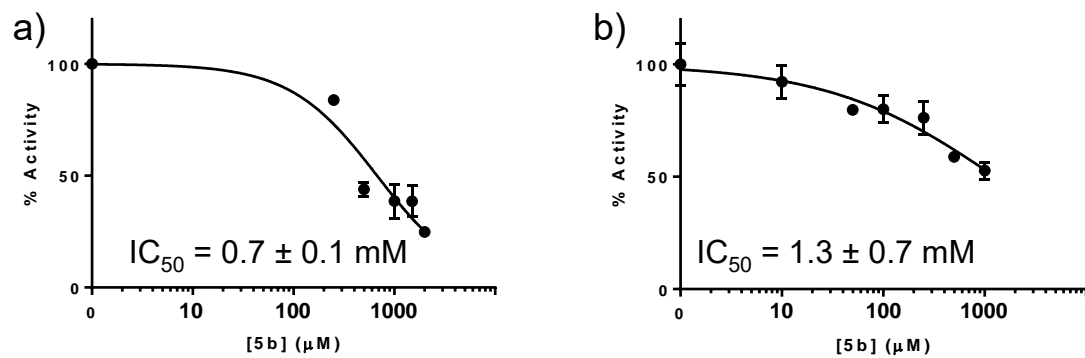

**Figure S20. IC<sub>50</sub> plots for analog 5b against a) *E. coli* IspD and b) *P. falciparum* IspD.**

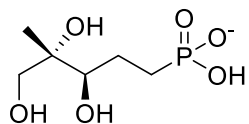

1

Exact Mass: 213.0533

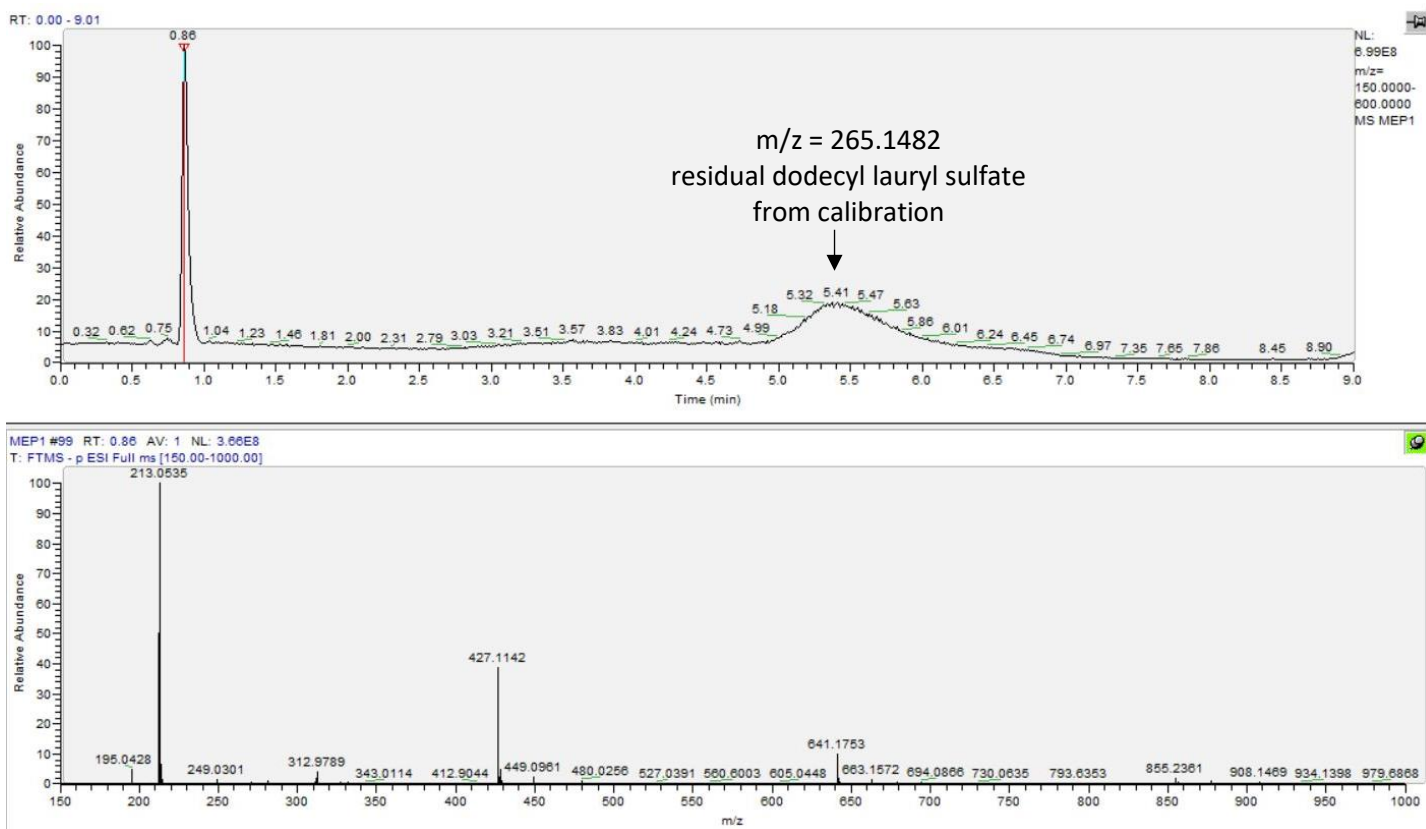

Figure S21. LC-HRMS analysis of analog 1 demonstrating >95% purity.

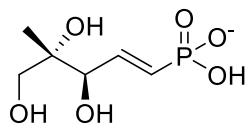

**2**

Exact Mass: 211.0377

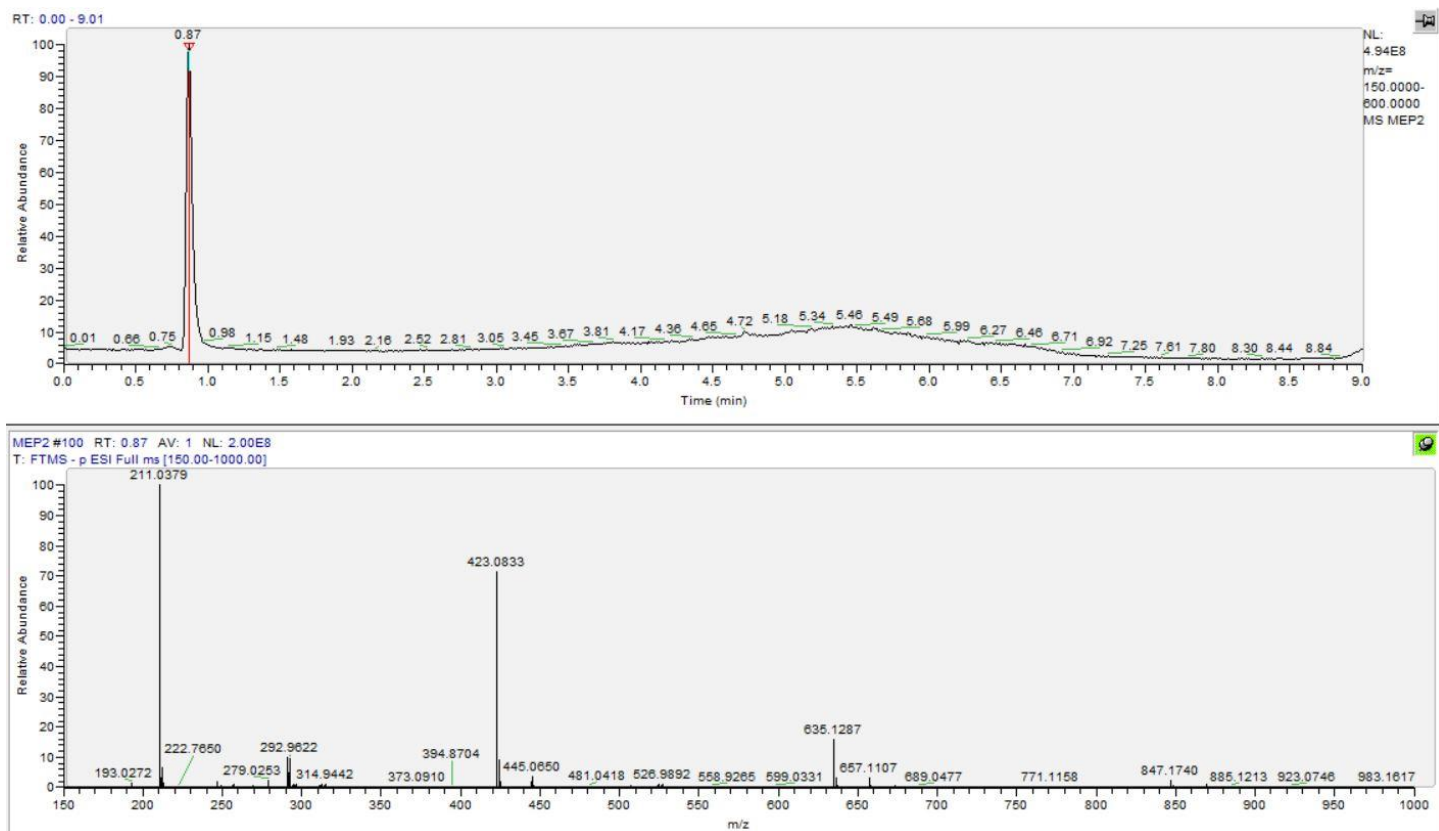

**Figure S22. LC-HRMS analysis of analog 2 demonstrating >95% purity.**

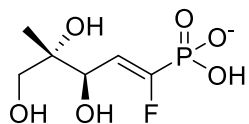

**3**

Exact Mass: 229.0283

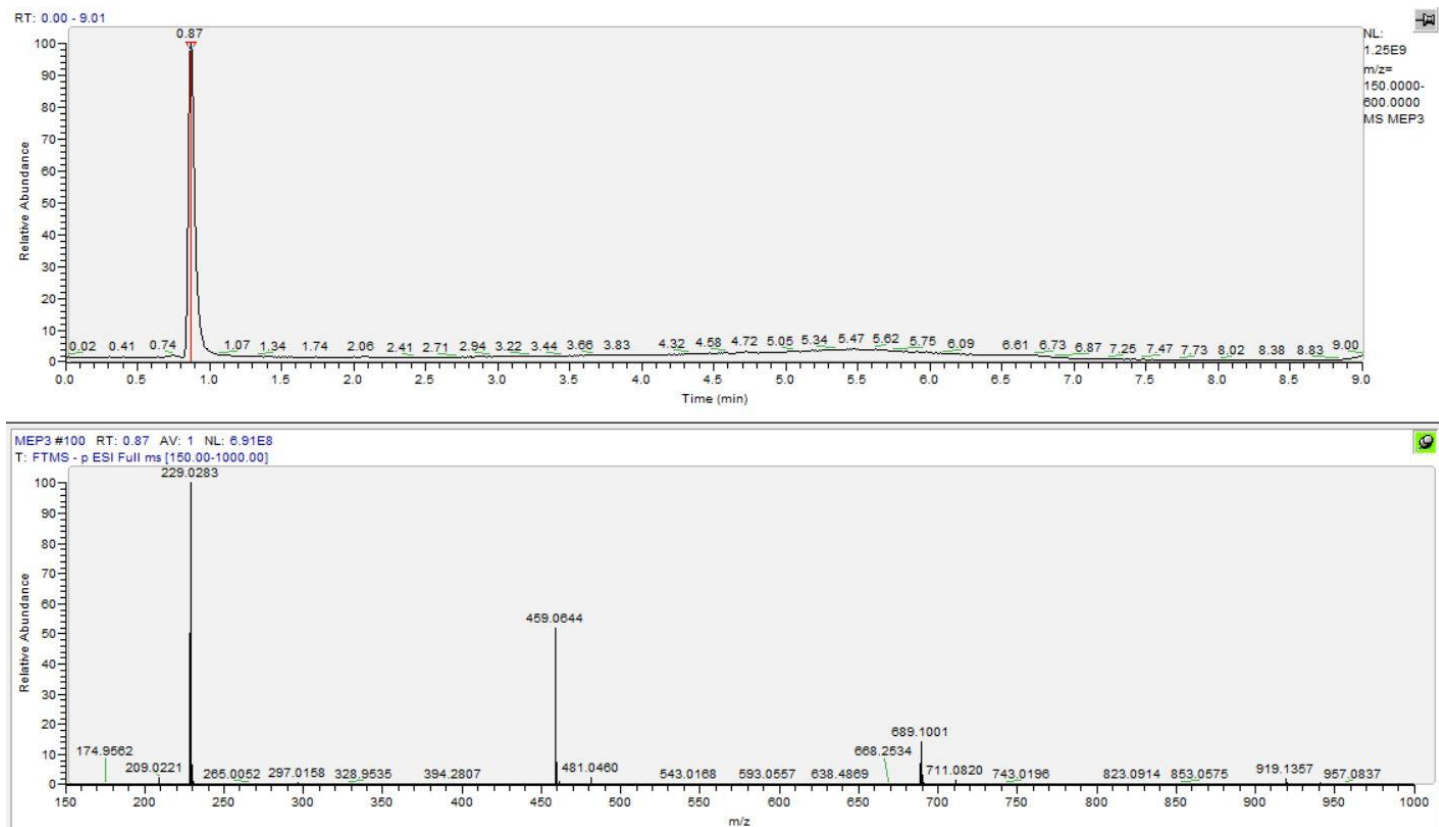

**Figure S23. LC-HRMS analysis of analog 3 demonstrating >95% purity.**

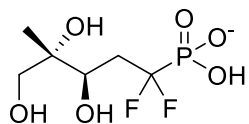

4

Exact Mass: 249.0345

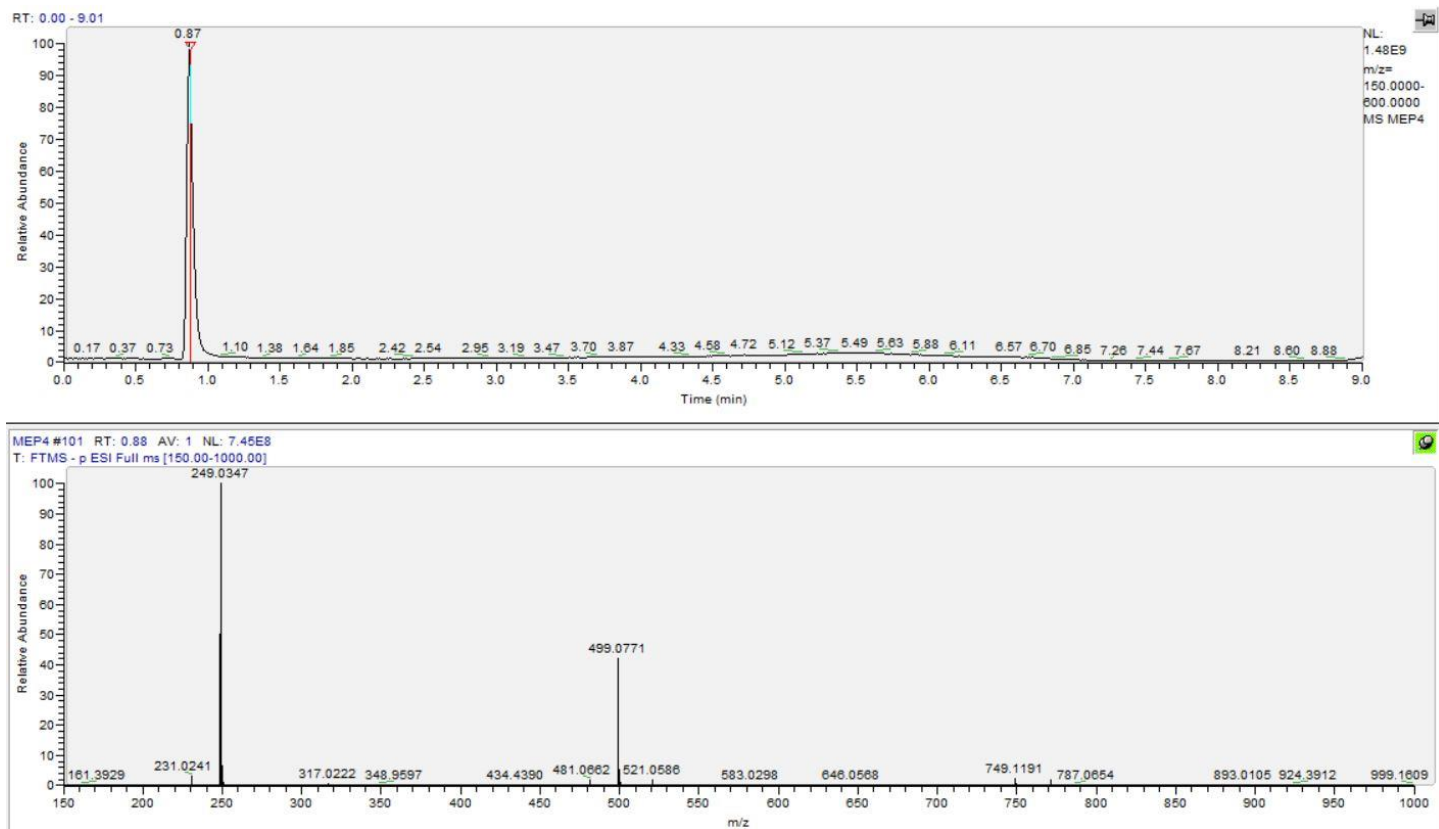

Figure S24. LC-HRMS analysis of analog 4 demonstrating >95% purity.

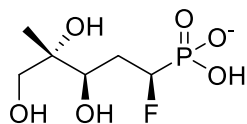

**5a**

Exact Mass: 231.0439

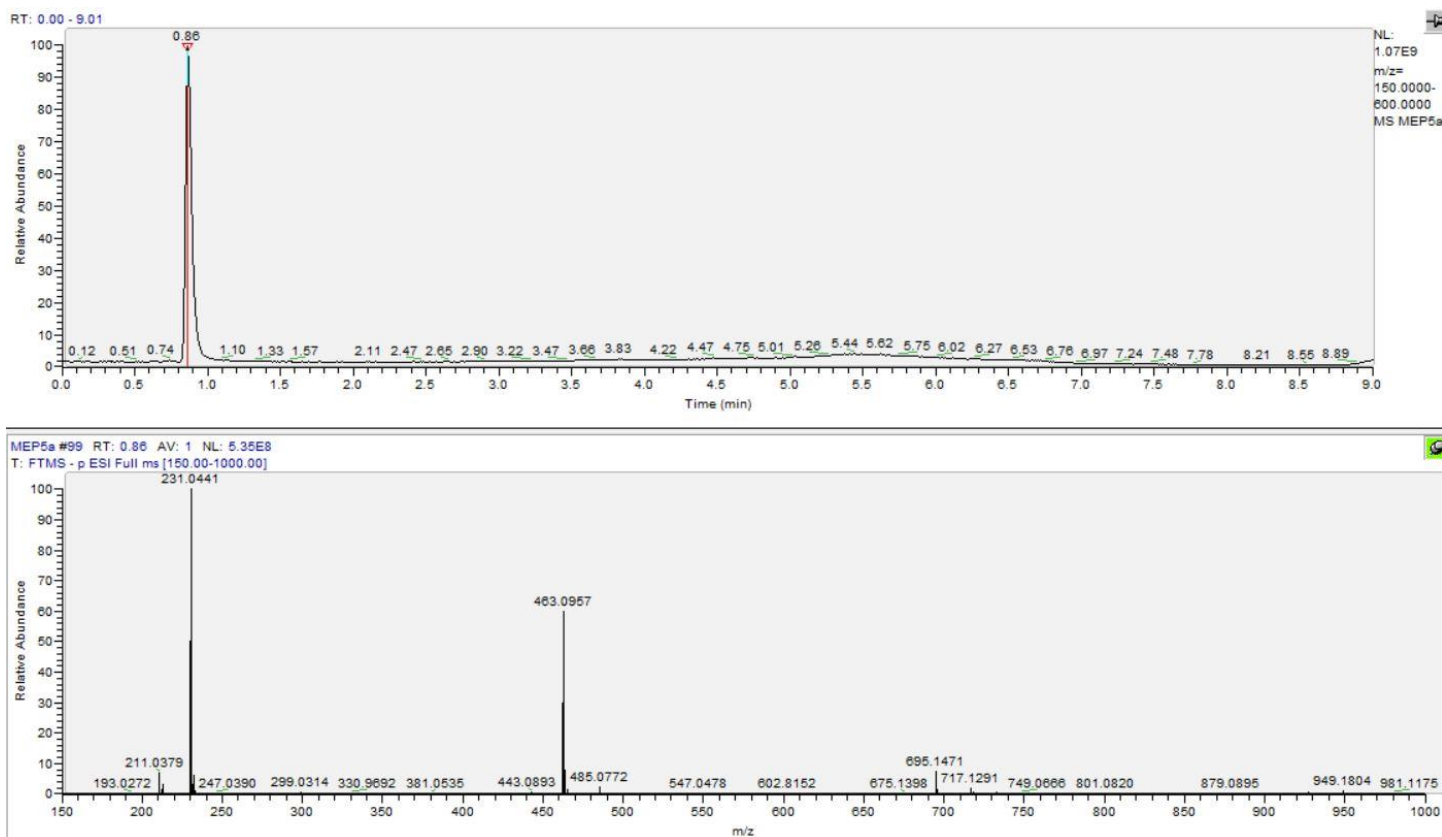

**Figure S25. LC-HRMS analysis of analog 5a demonstrating >95% purity.** The mass observed at 211.0379 corresponds to the fluoride elimination product, vinyl phosphonate **2**. This product appears to be an artifact of the ionization process as there are no observable peaks corresponding to **2** in the  $^1\text{H}$  NMR spectrum (below).

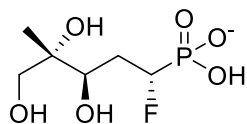

**5b**

Exact Mass: 231.0439

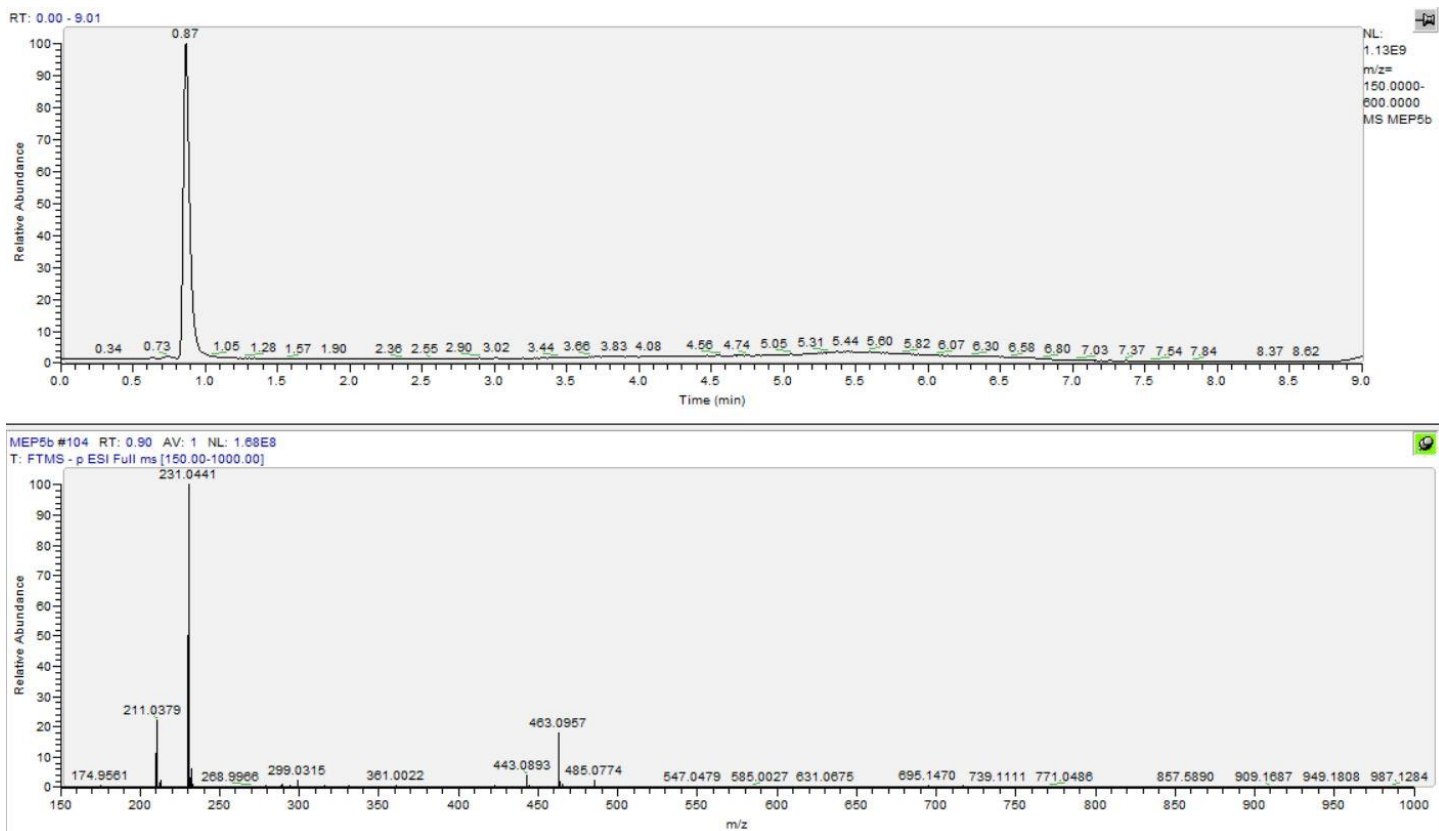

**Figure S26. LC-HRMS analysis of analog 5b demonstrating >95% purity.** The mass observed at 211.0379 corresponds to the fluoride elimination product, vinyl phosphonate **2**. This product appears to be an artifact of the ionization process as there are no observable peaks corresponding to **2** in the  $^1\text{H}$  NMR spectrum (below).

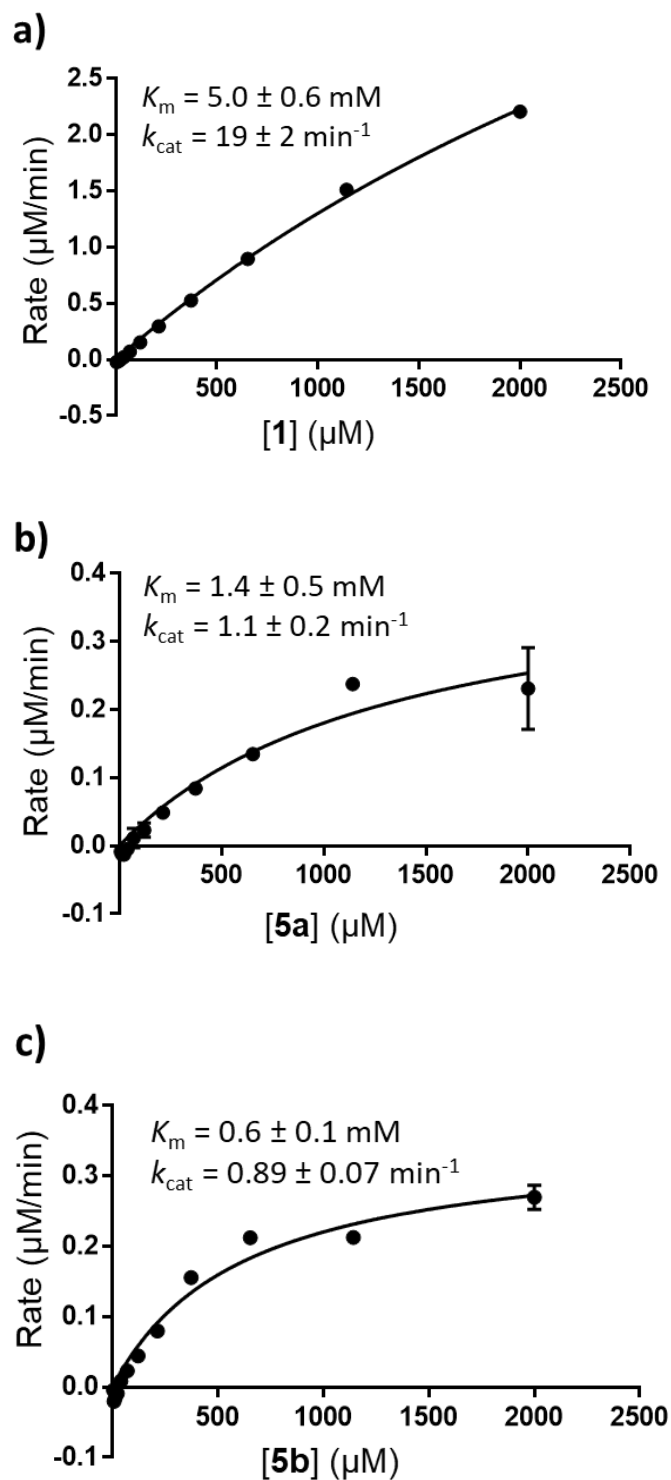

**Figure S27. Michaelis-Menten plots for MEP and analogs 1 and 5a,b with *P. falciparum* IspD.** The relatively high  $K_m$  values determined by these experiments demonstrate that the non-negligible (-) MEP control rates observed in Figure S19 are very unlikely to be masking potent inhibition.

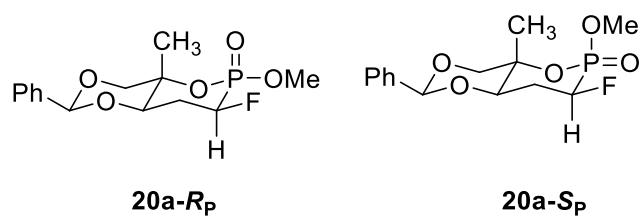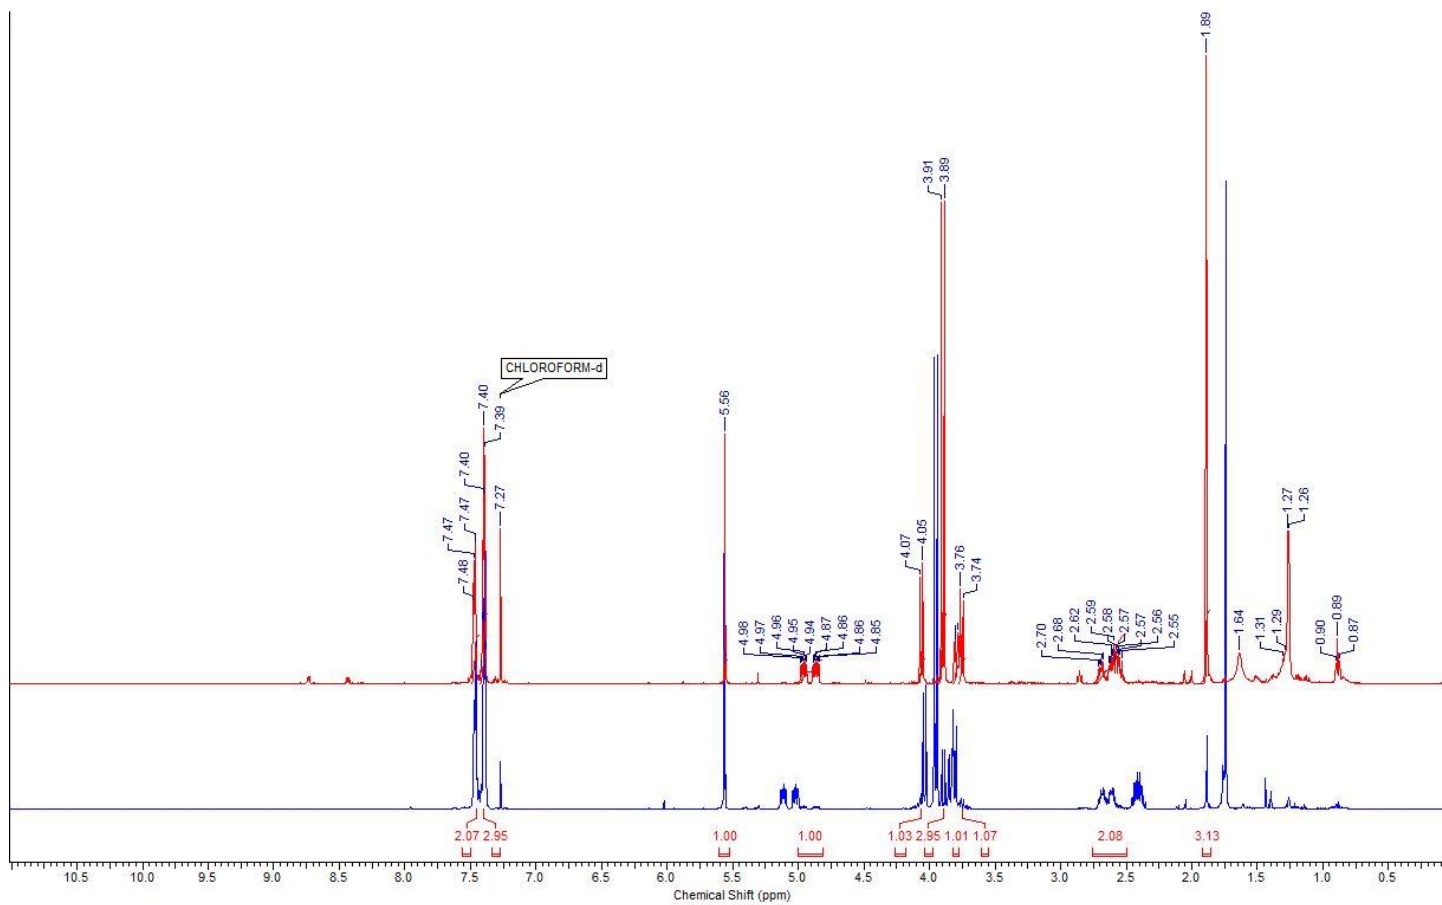

**Figure S28.** Overlay of  $^1\text{H}$  spectra for diastereomers of phosphonolactone 20a. The top and bottom spectra are assigned to be the *R*- and *S*- configurations at the phosphonate, respectively.

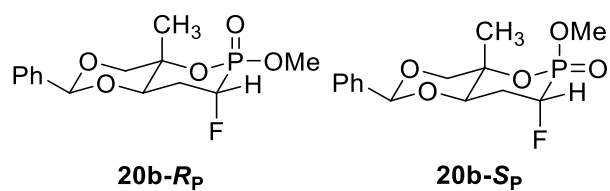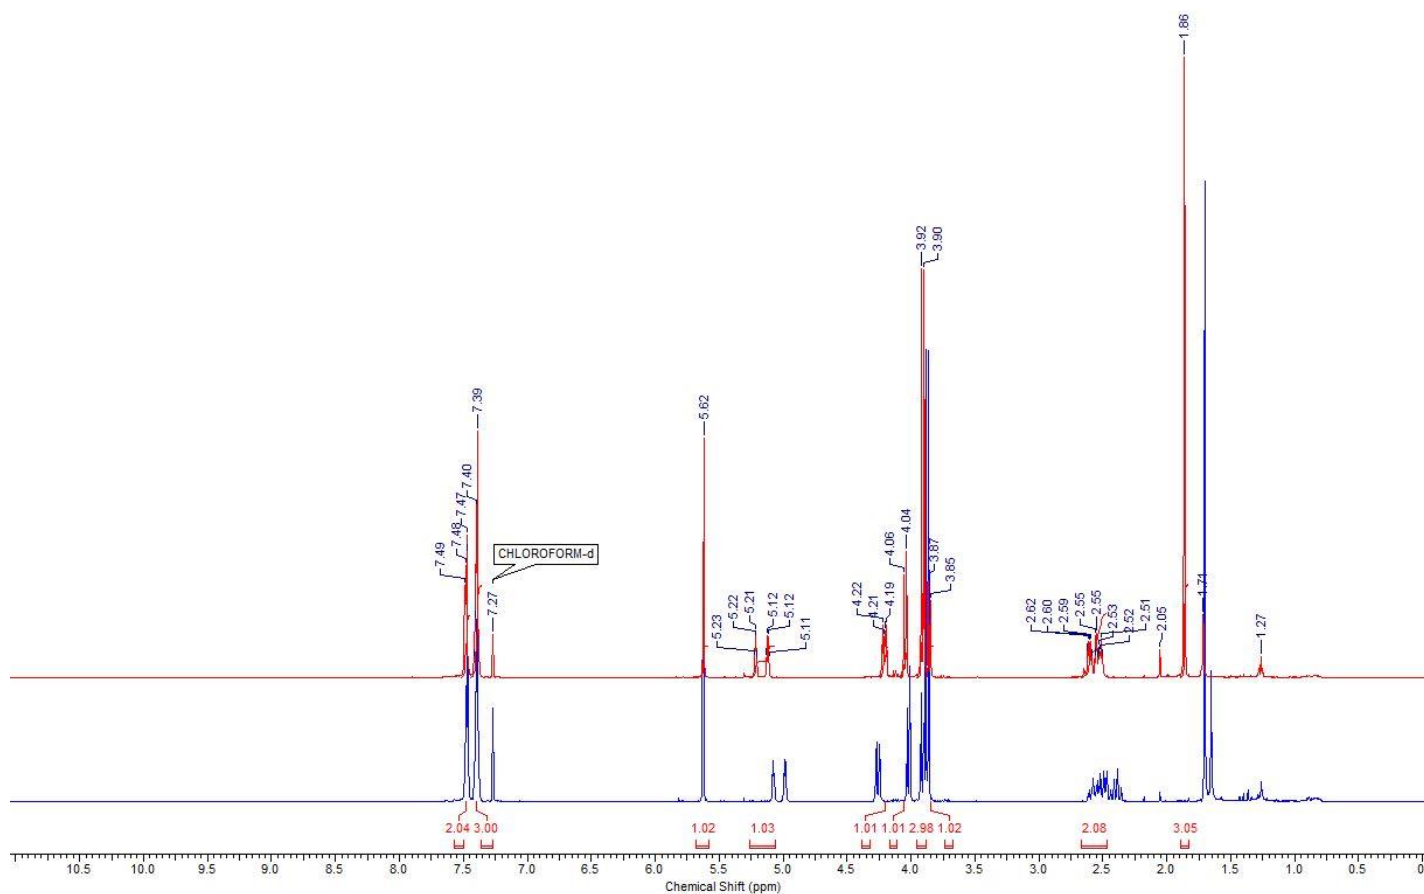

**Figure S29.** Overlay of  $^1\text{H}$  spectra for diastereomers of phosphonolactone 20b. The top and bottom spectra are assigned to be the *R*- and *S*- configurations at the phosphonate, respectively.

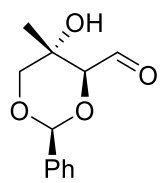

7

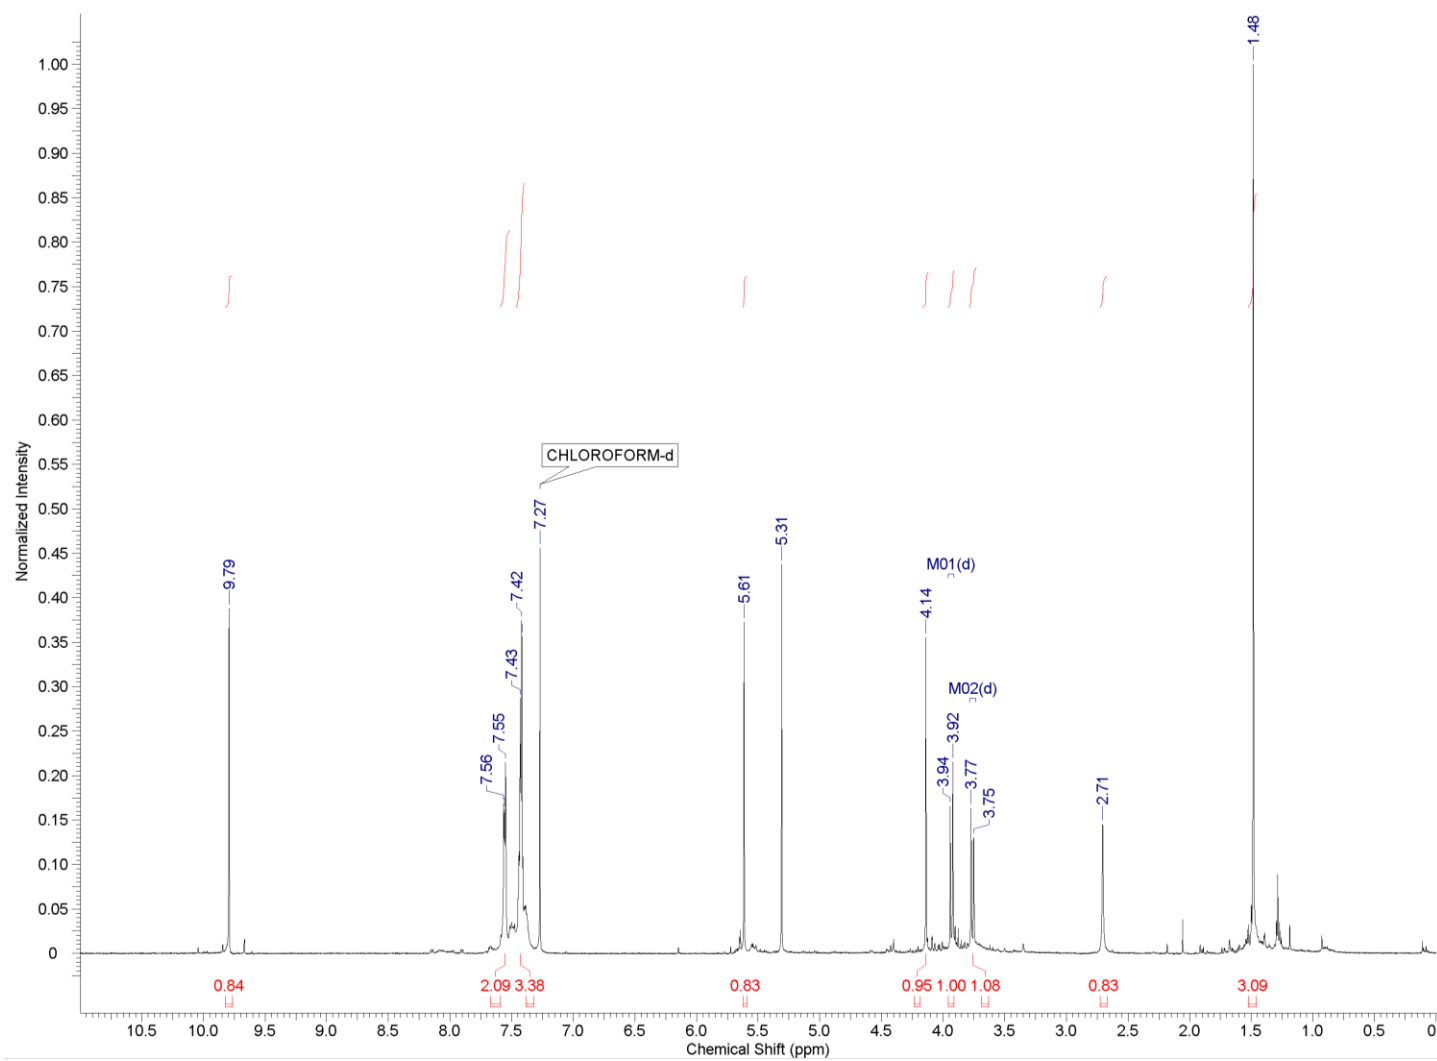



7

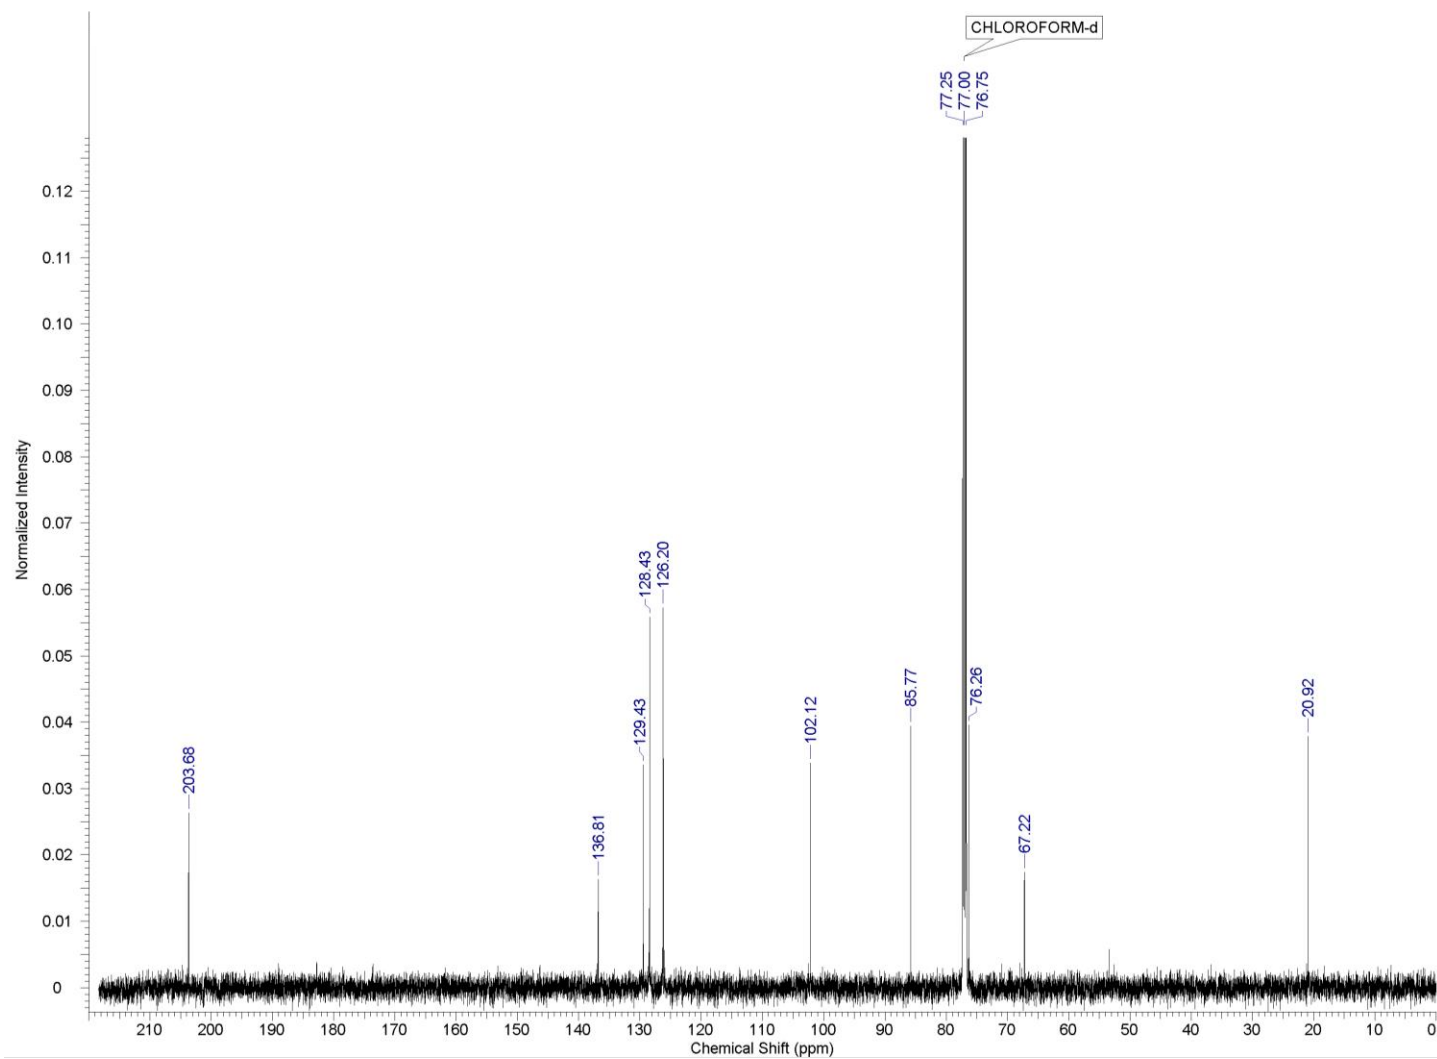

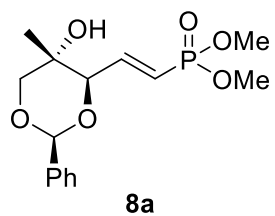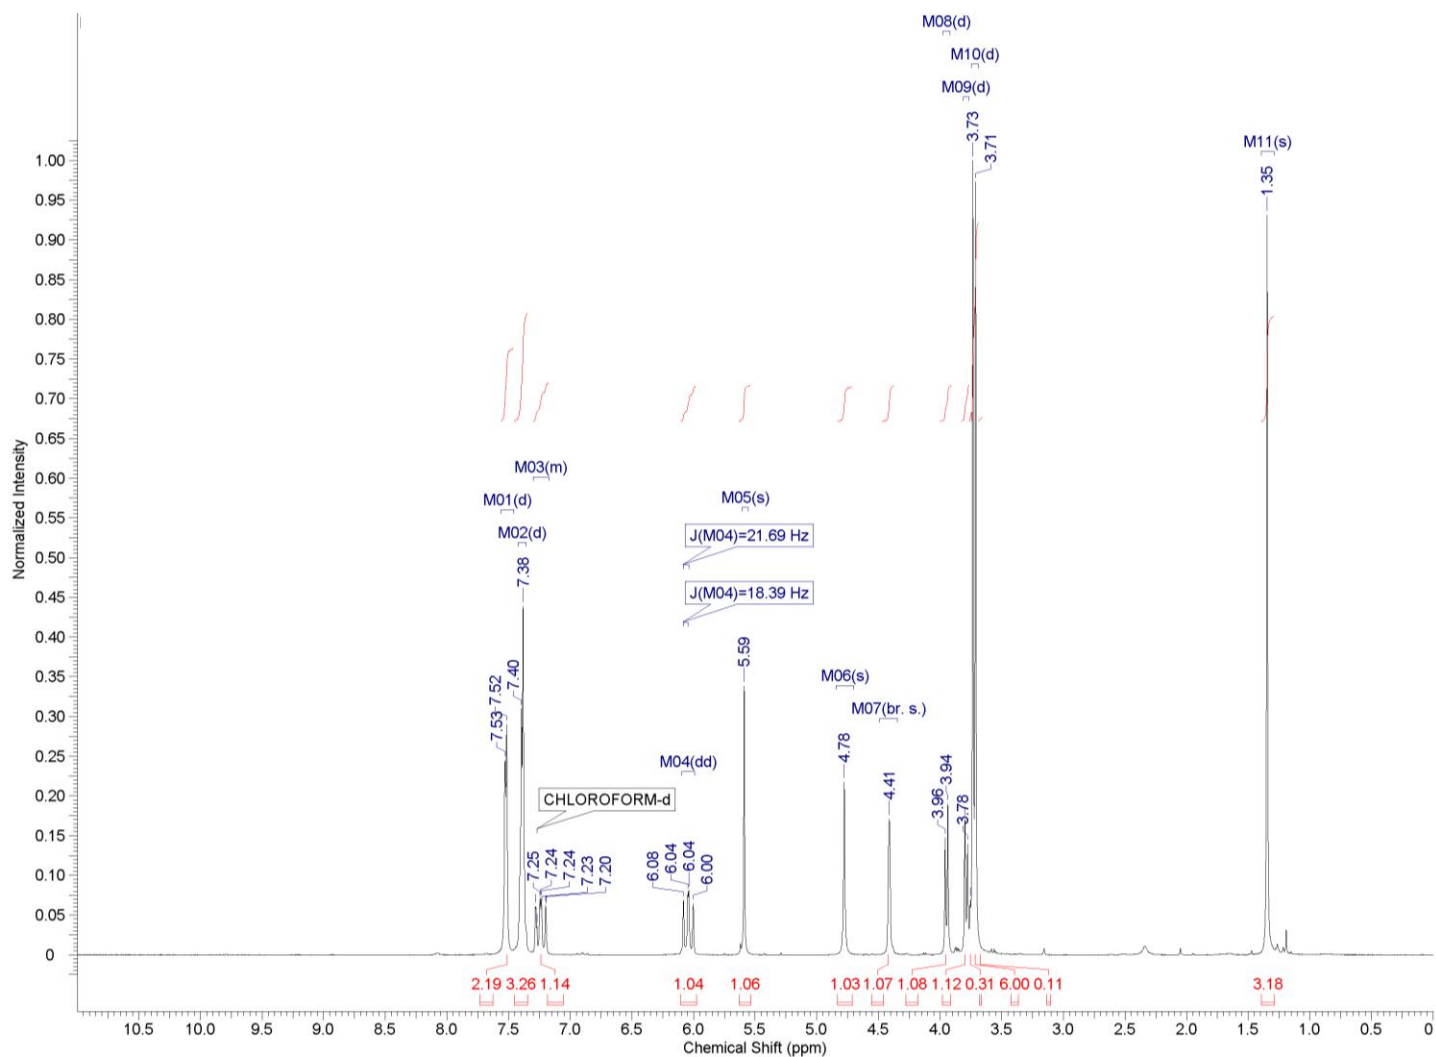

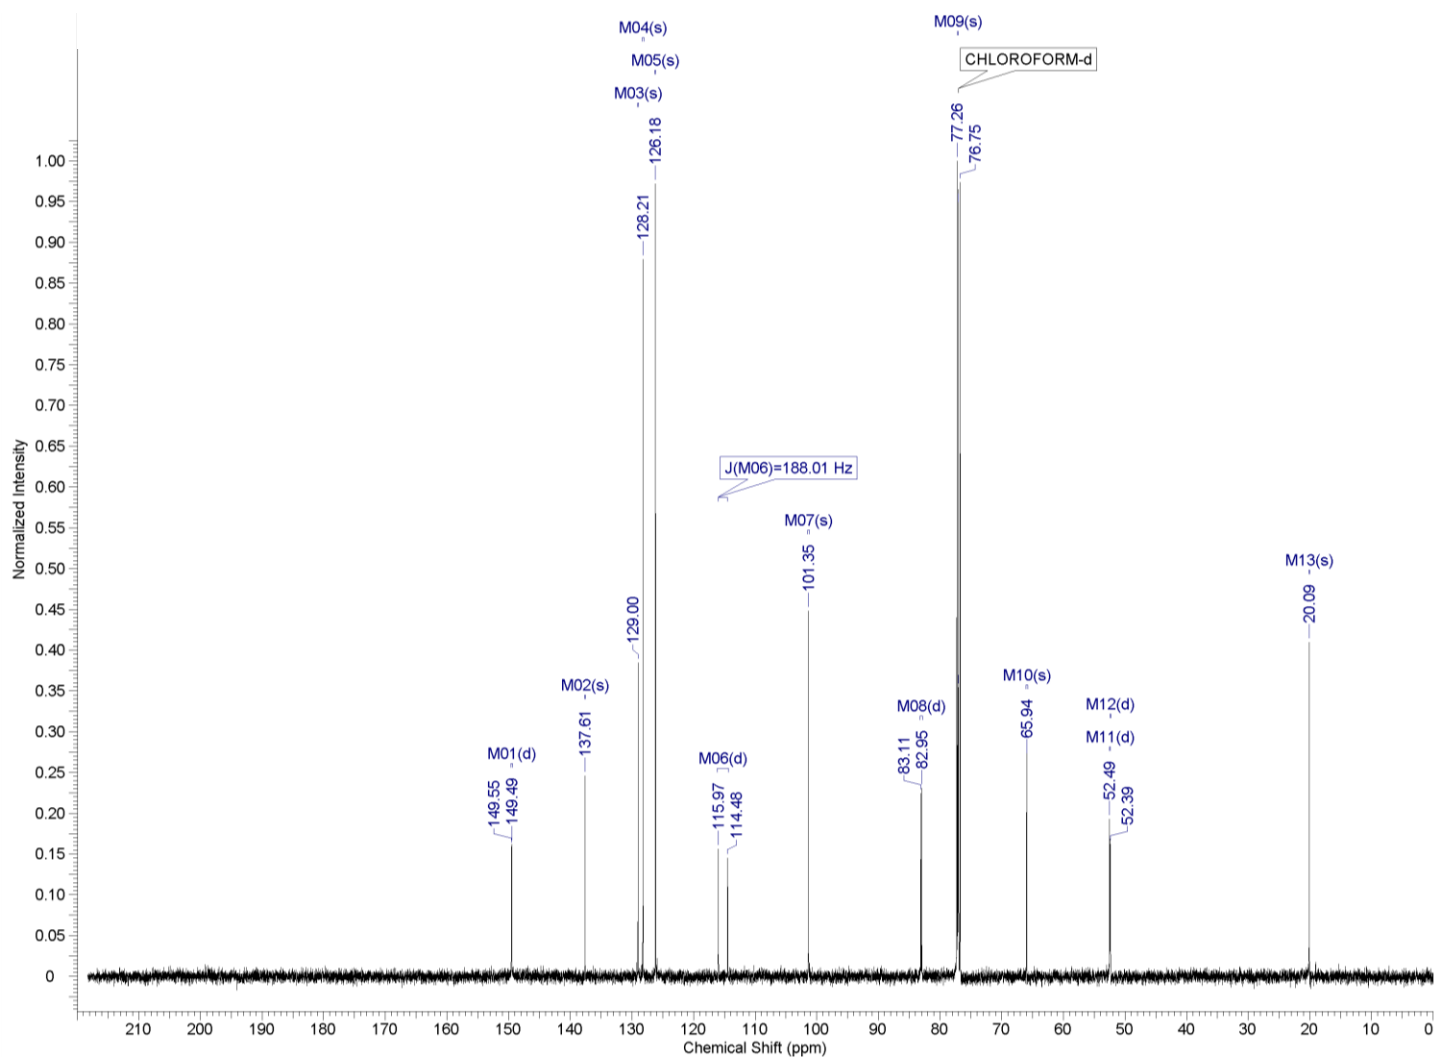

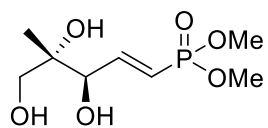

10a

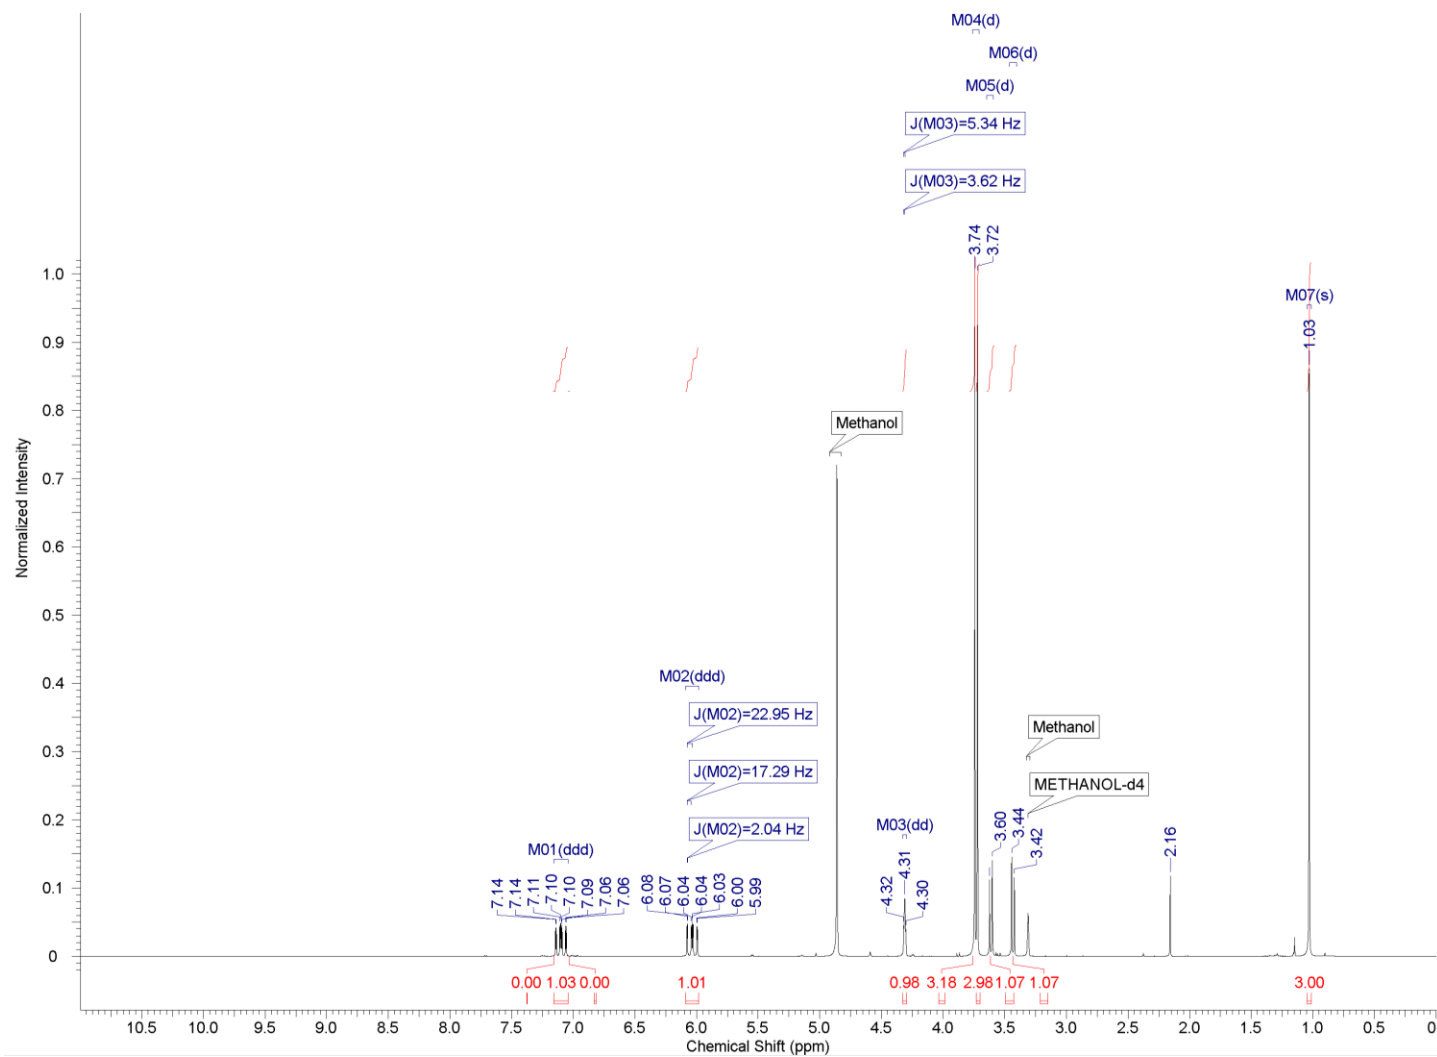



**10a**

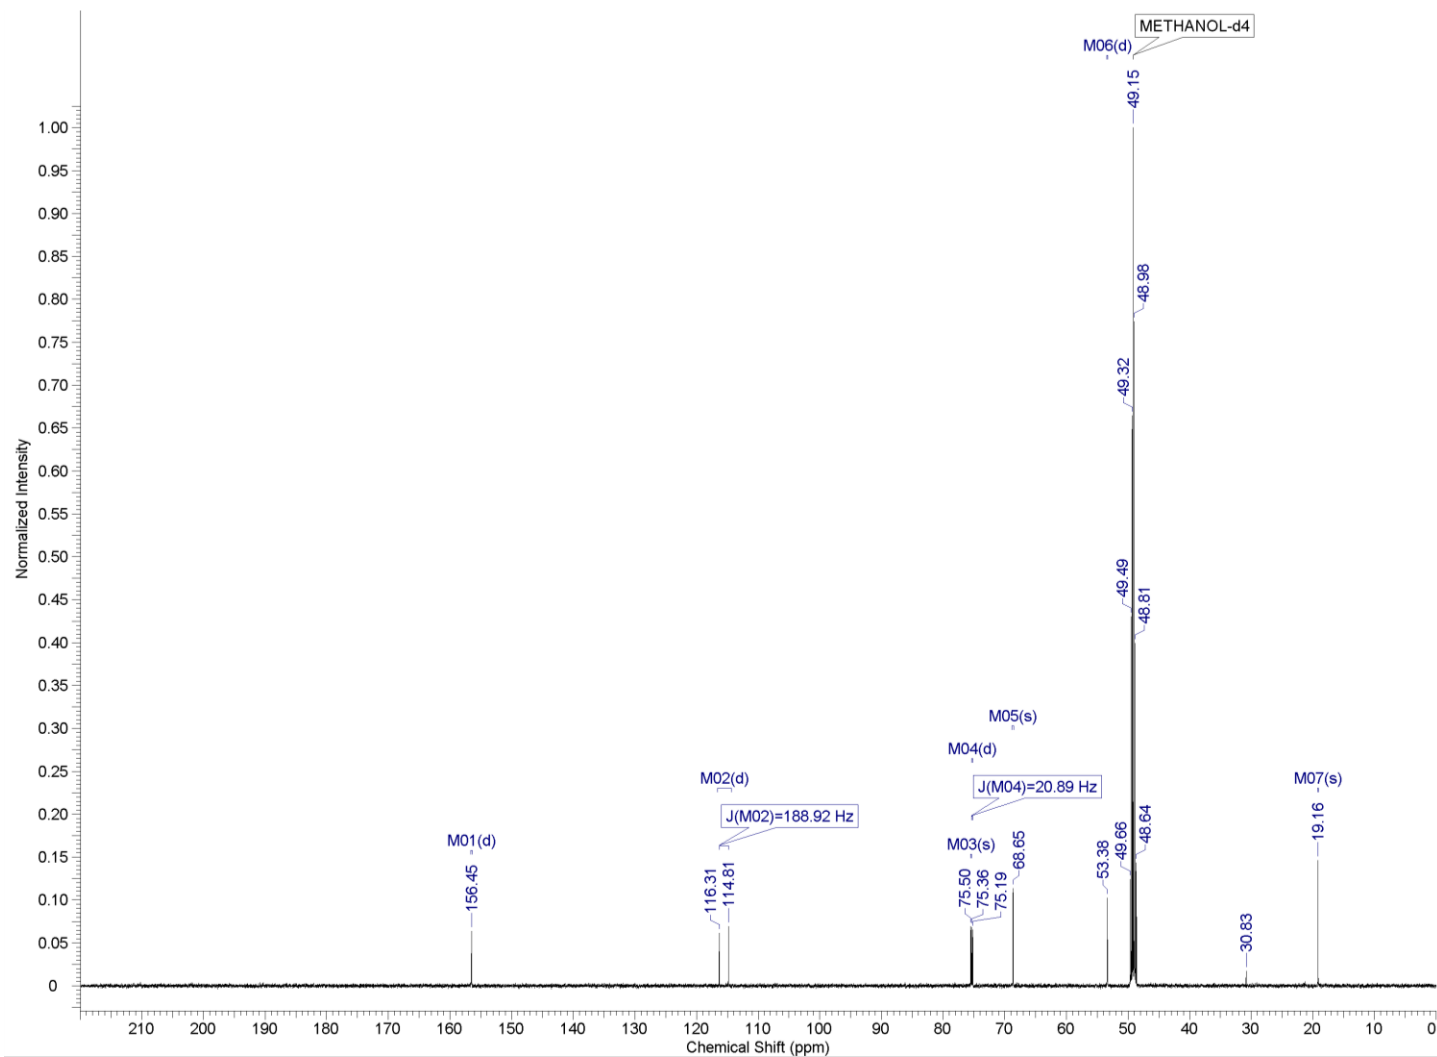

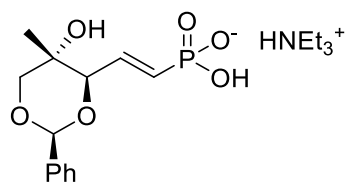

**9a**

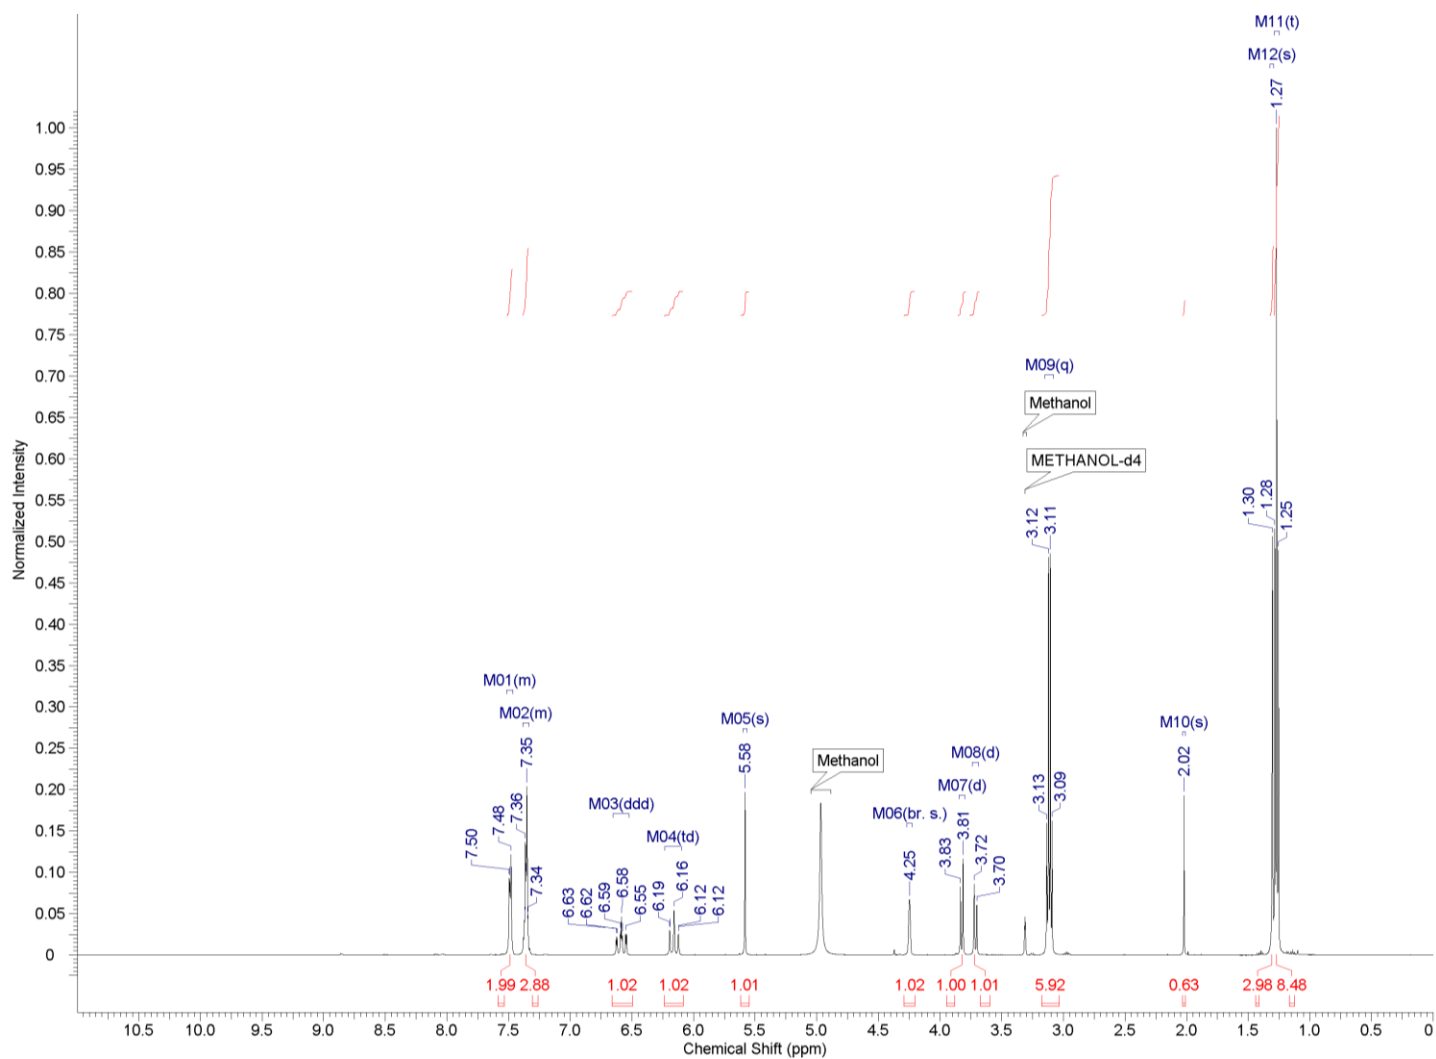

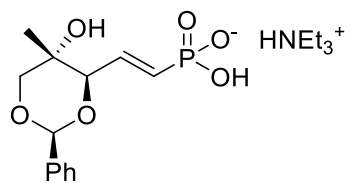

**9a**

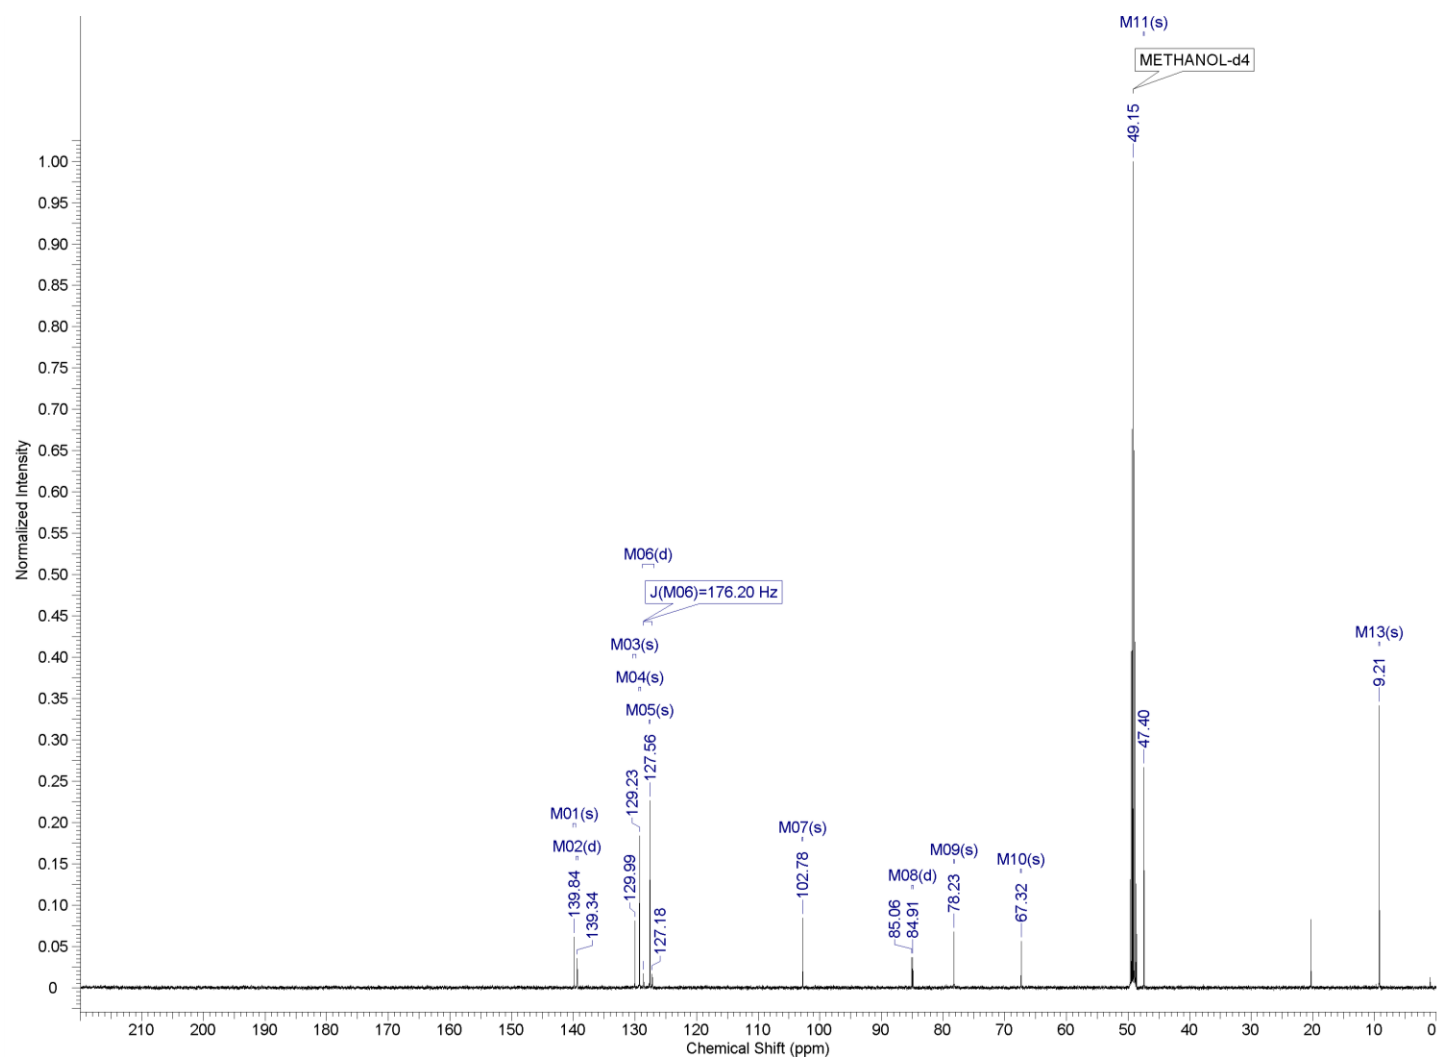

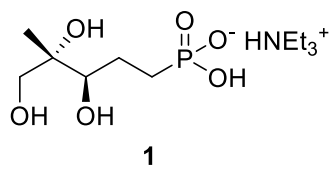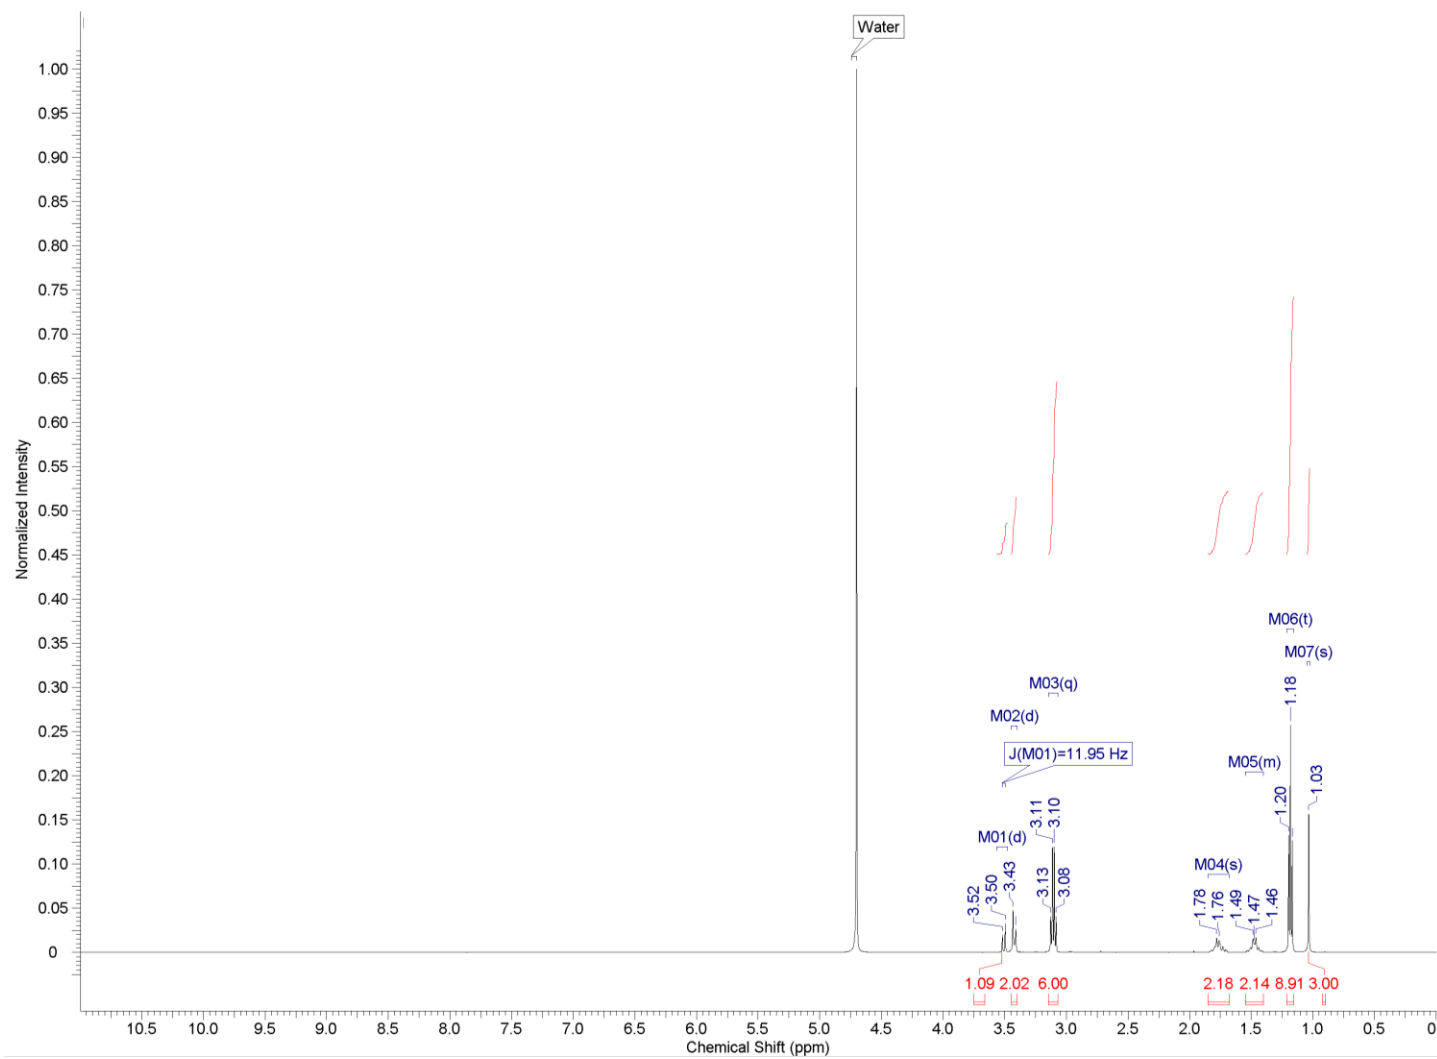

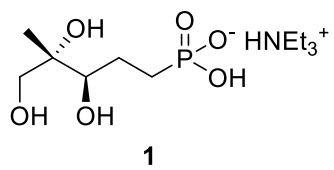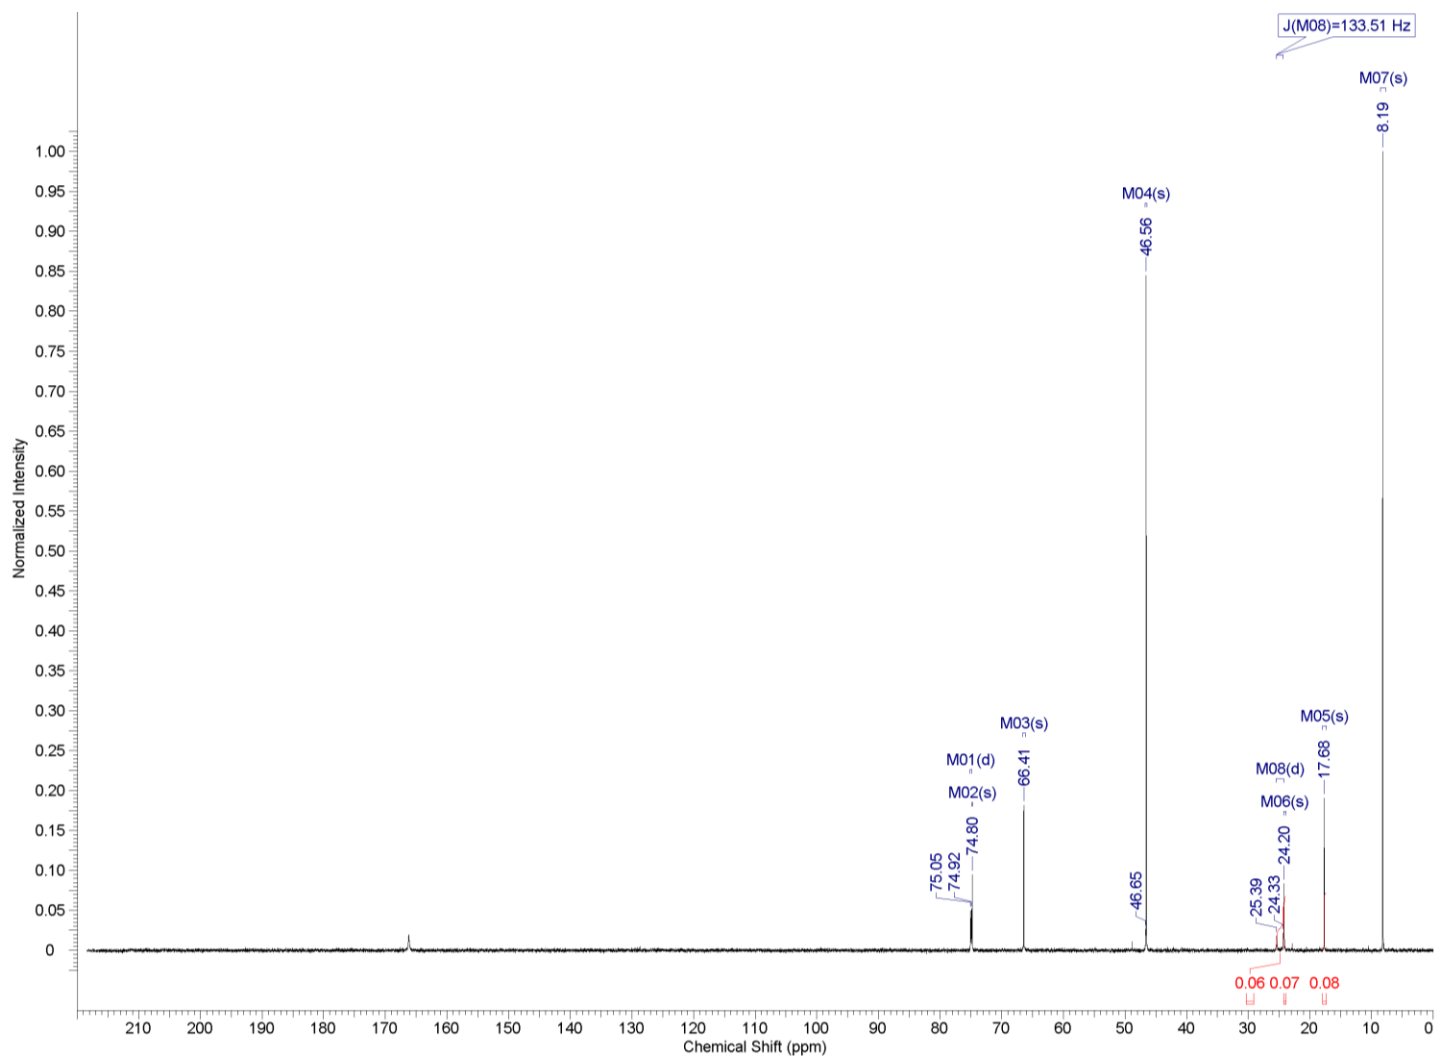

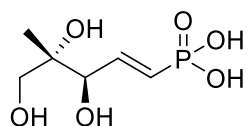

2

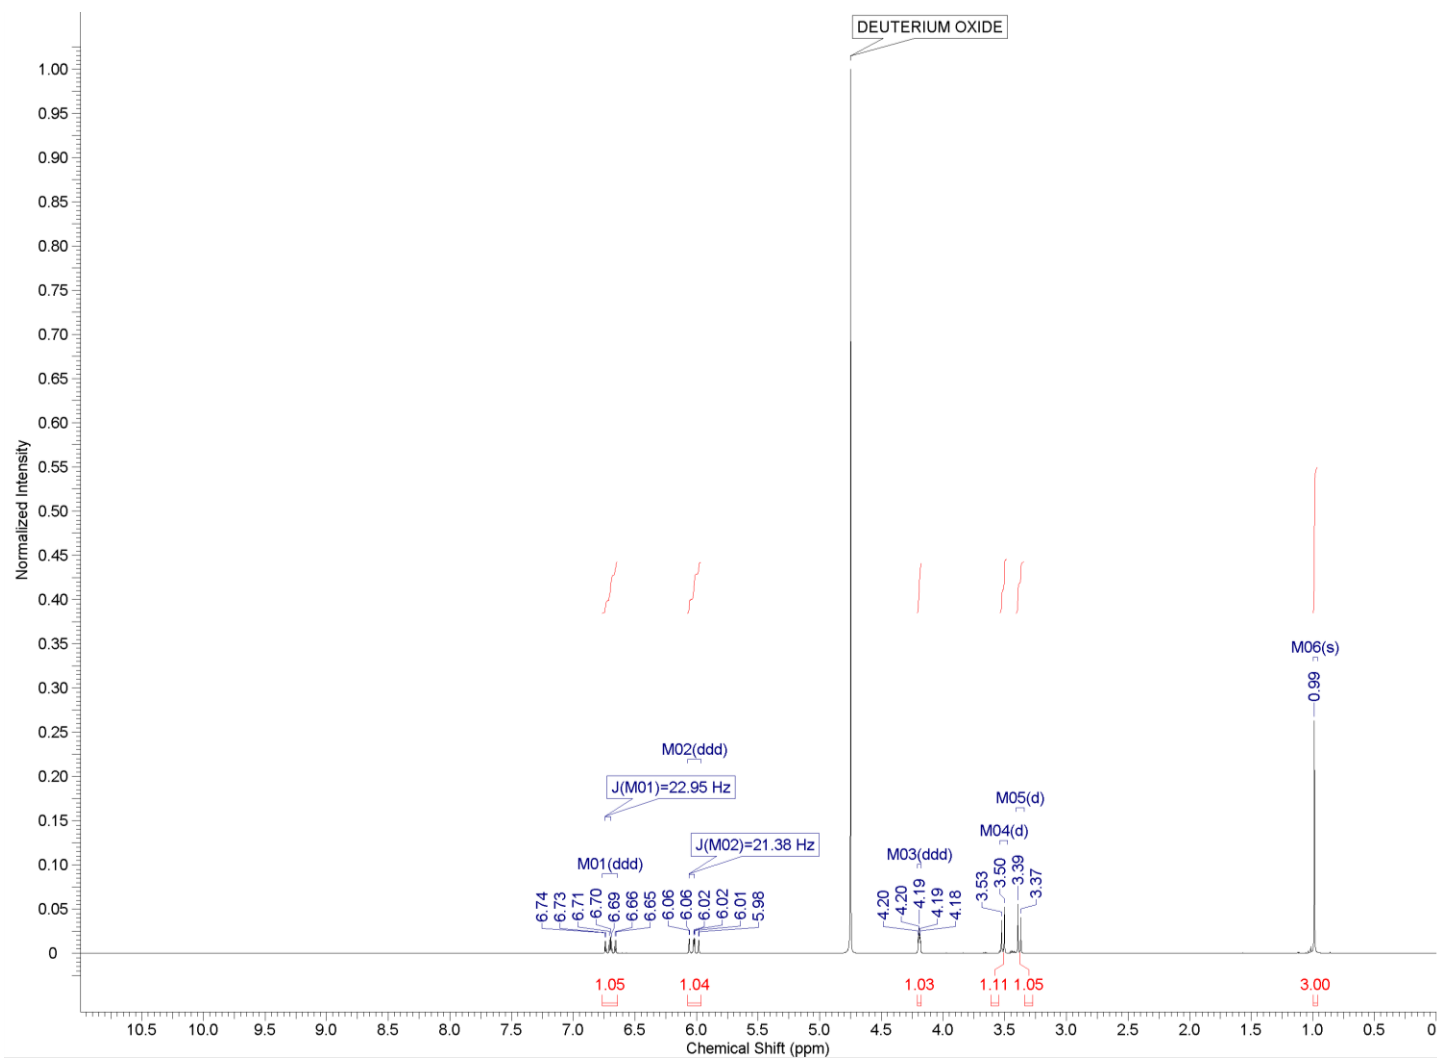



2

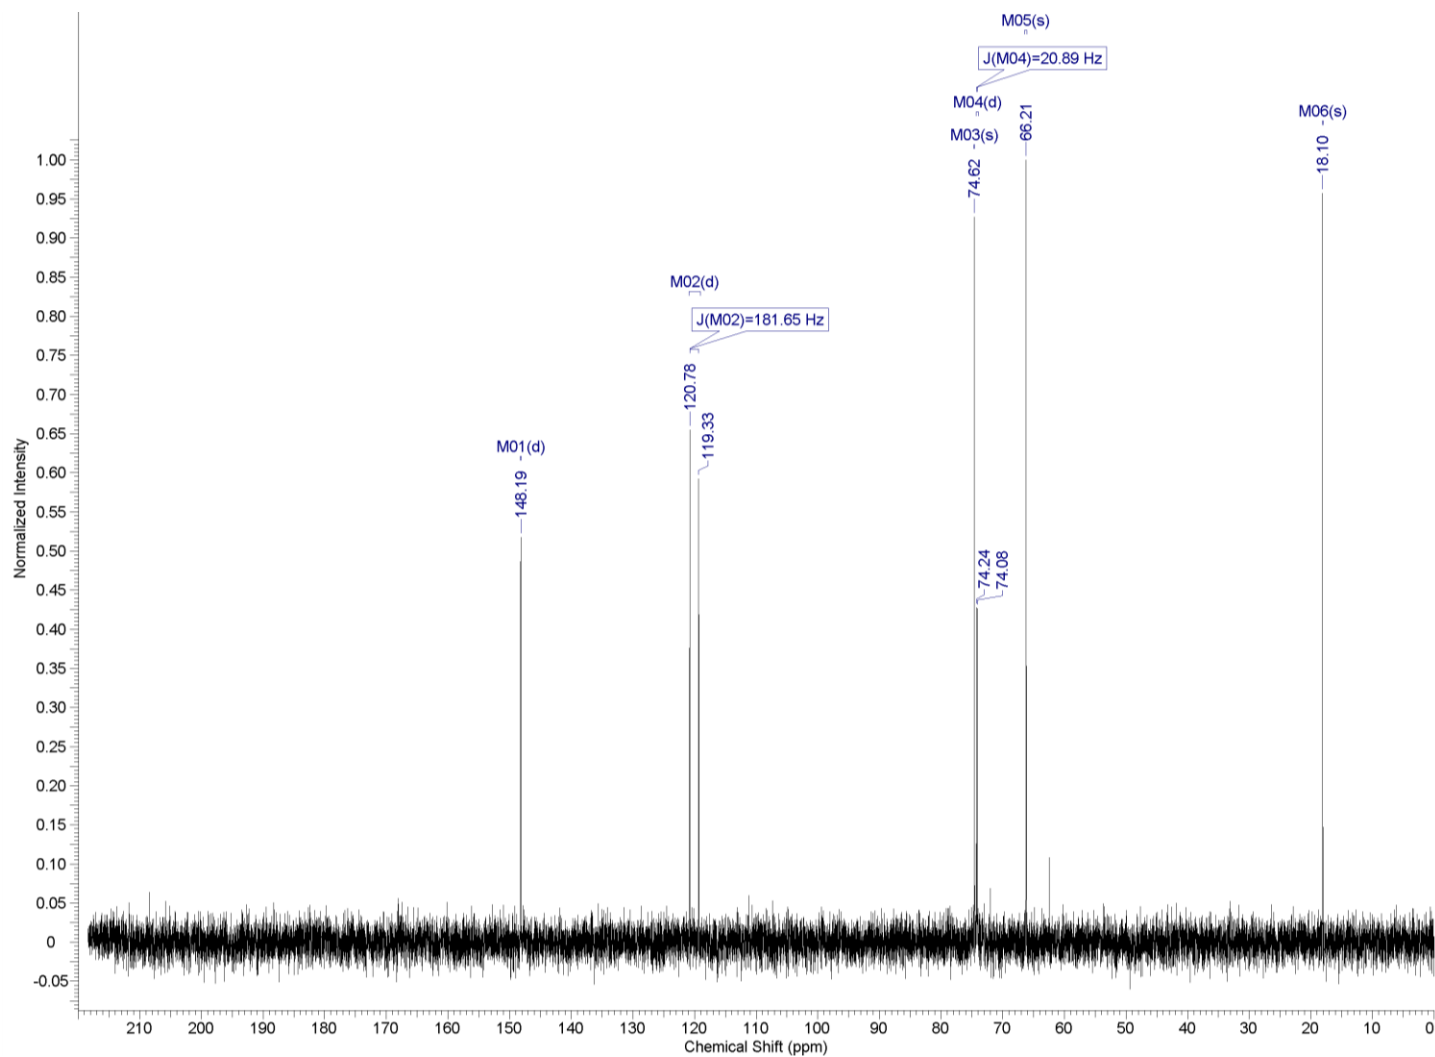

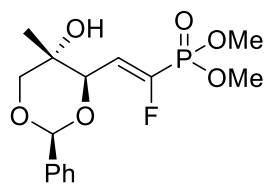

8b

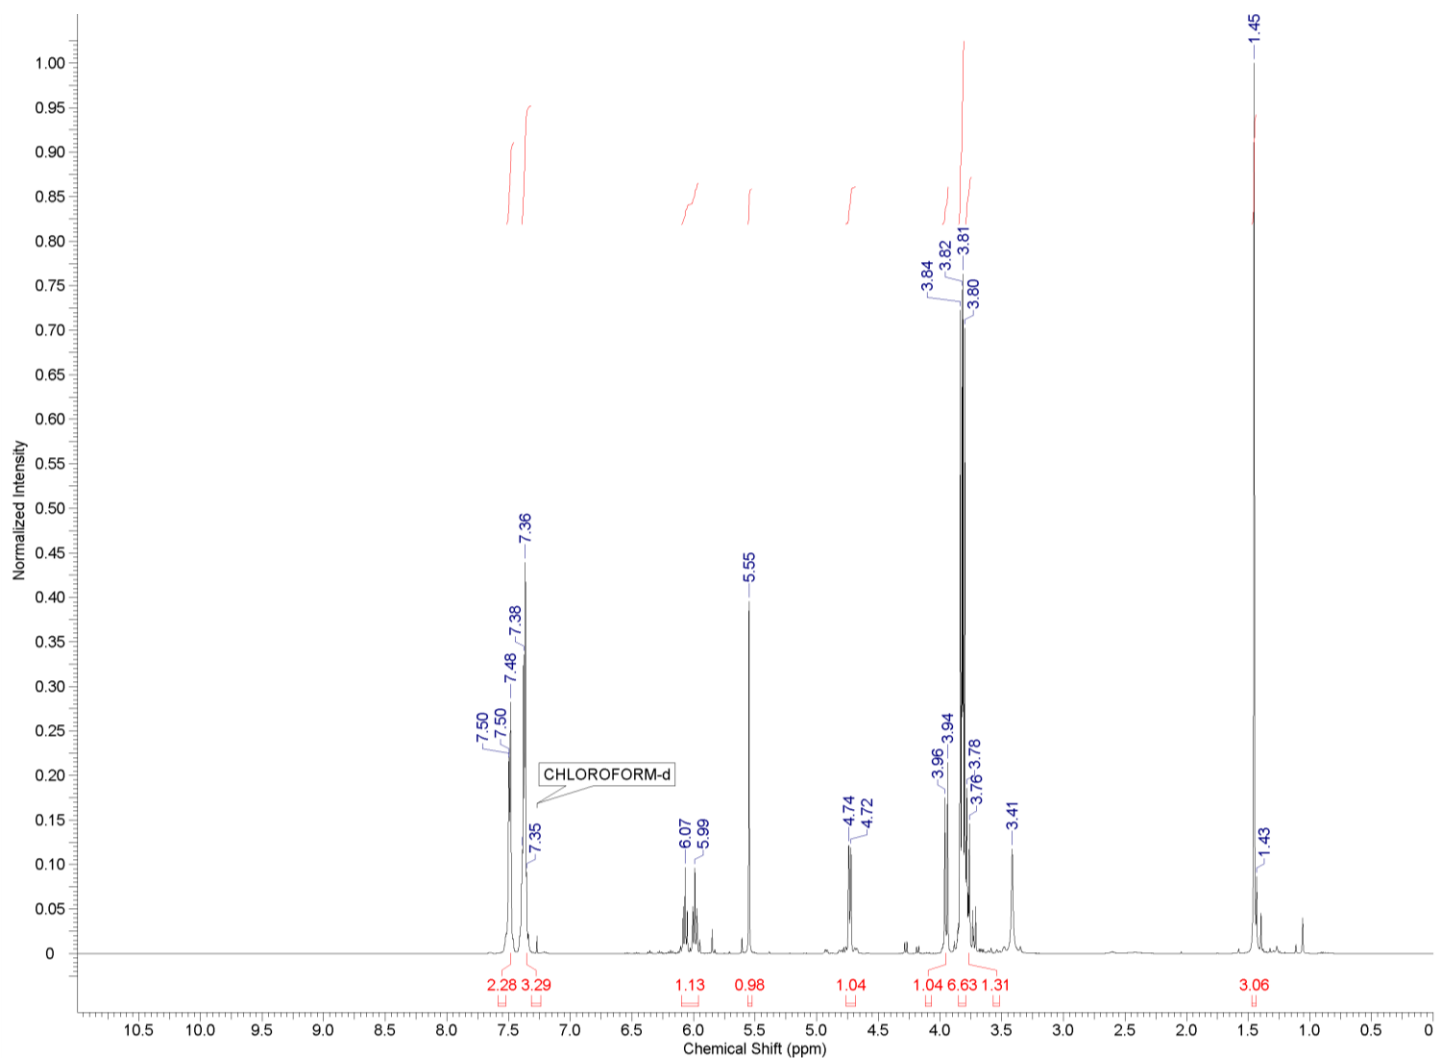



**8b**

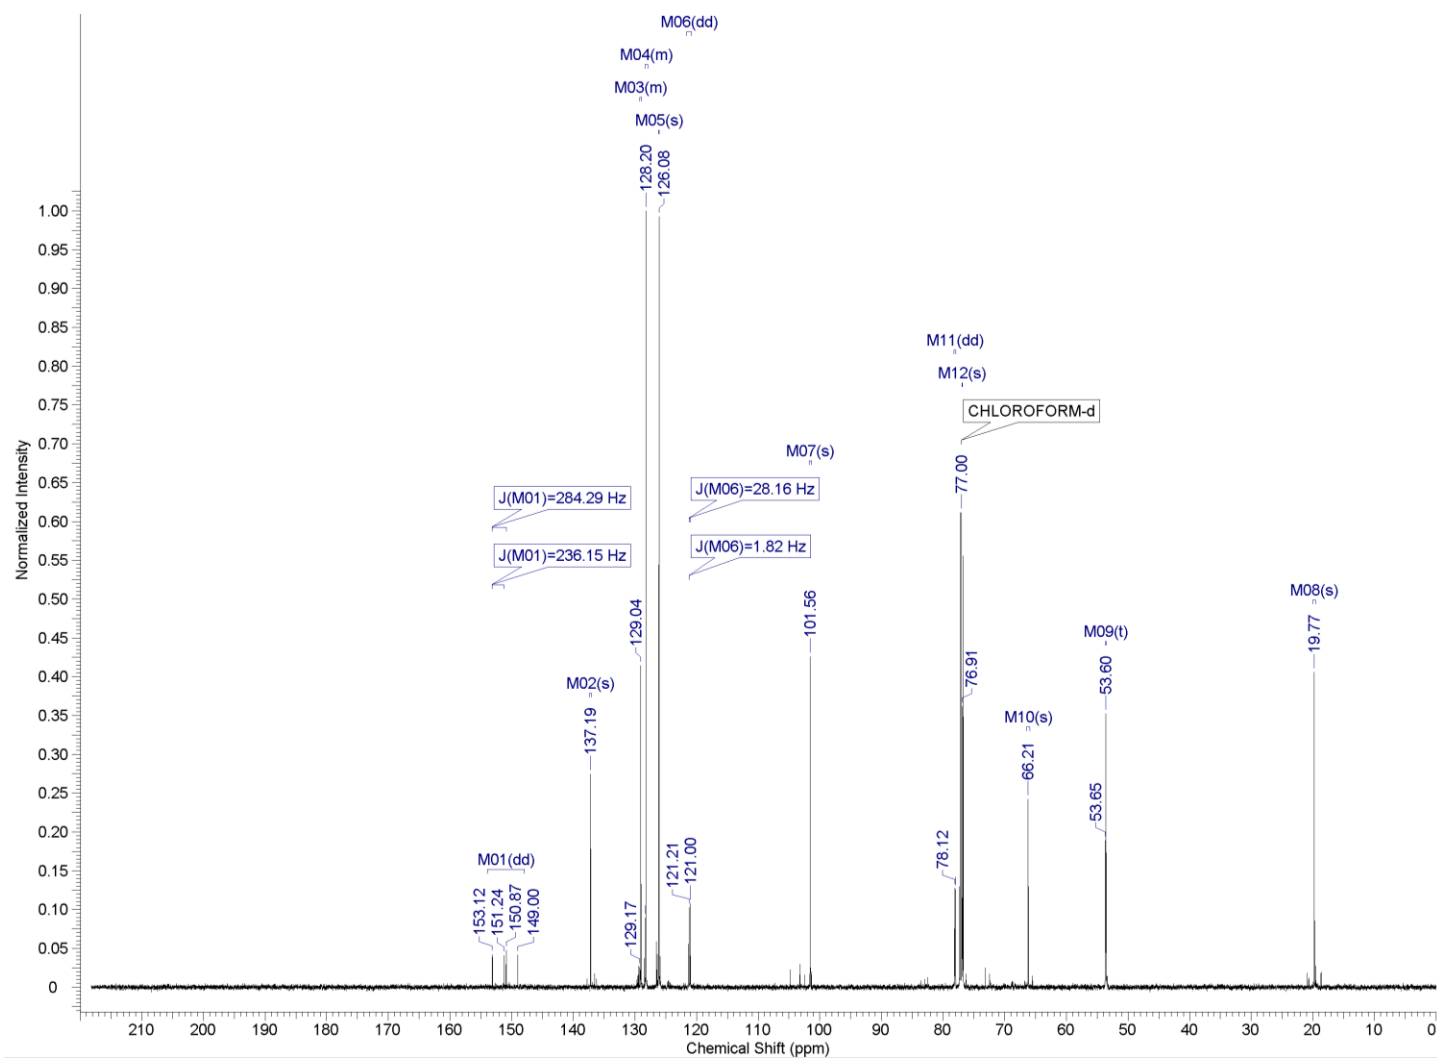

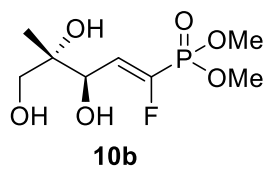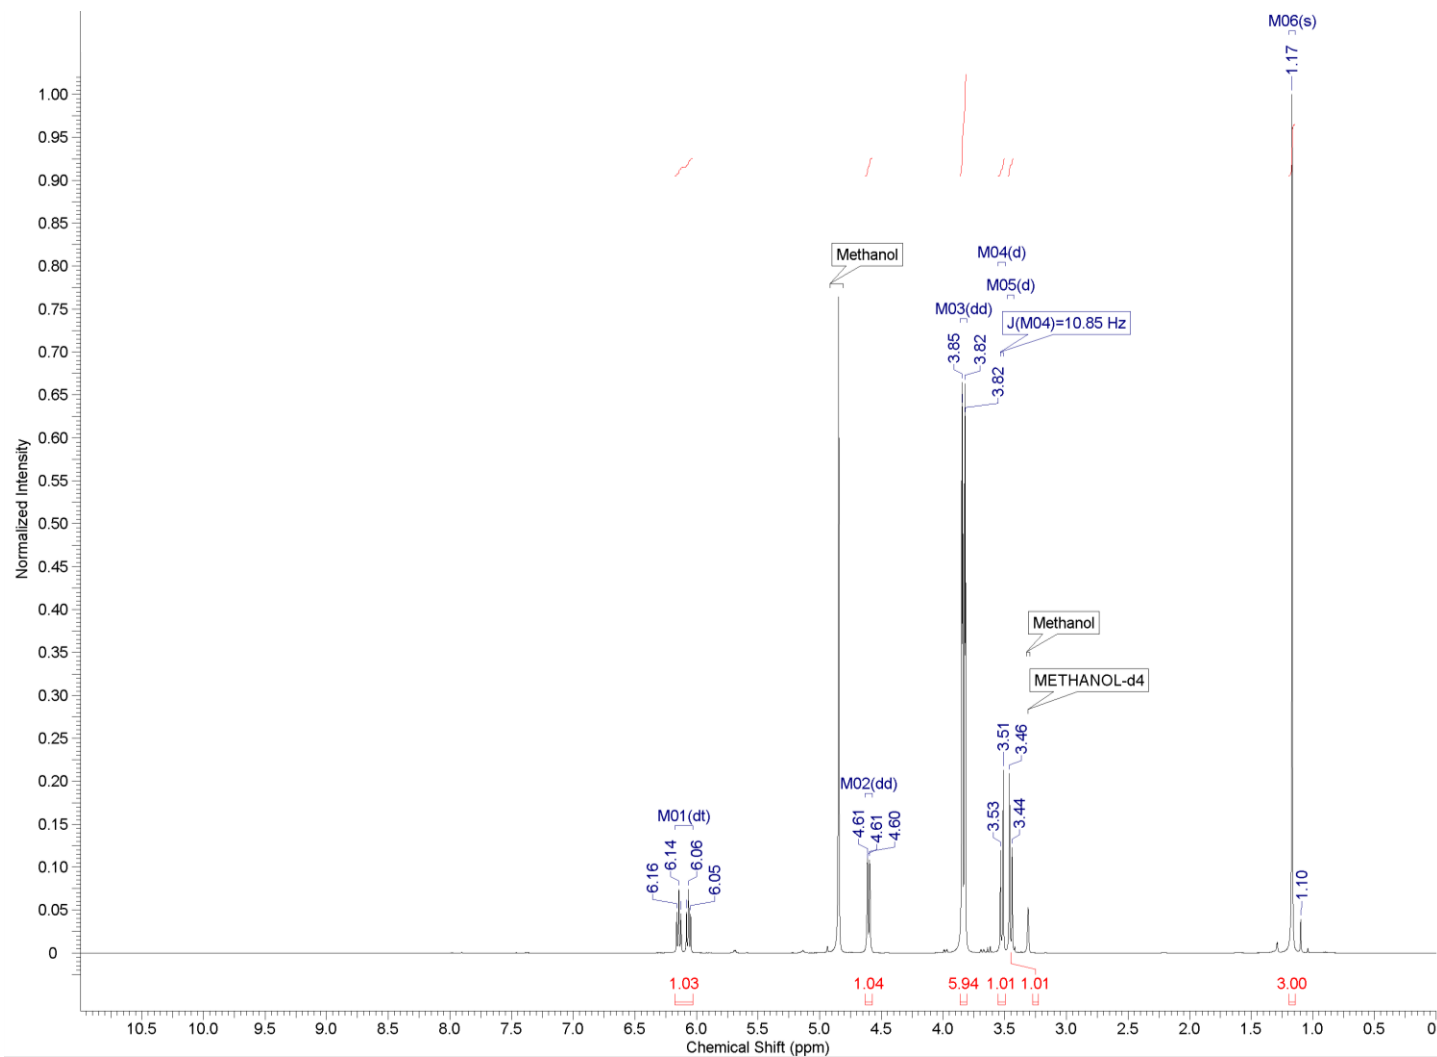

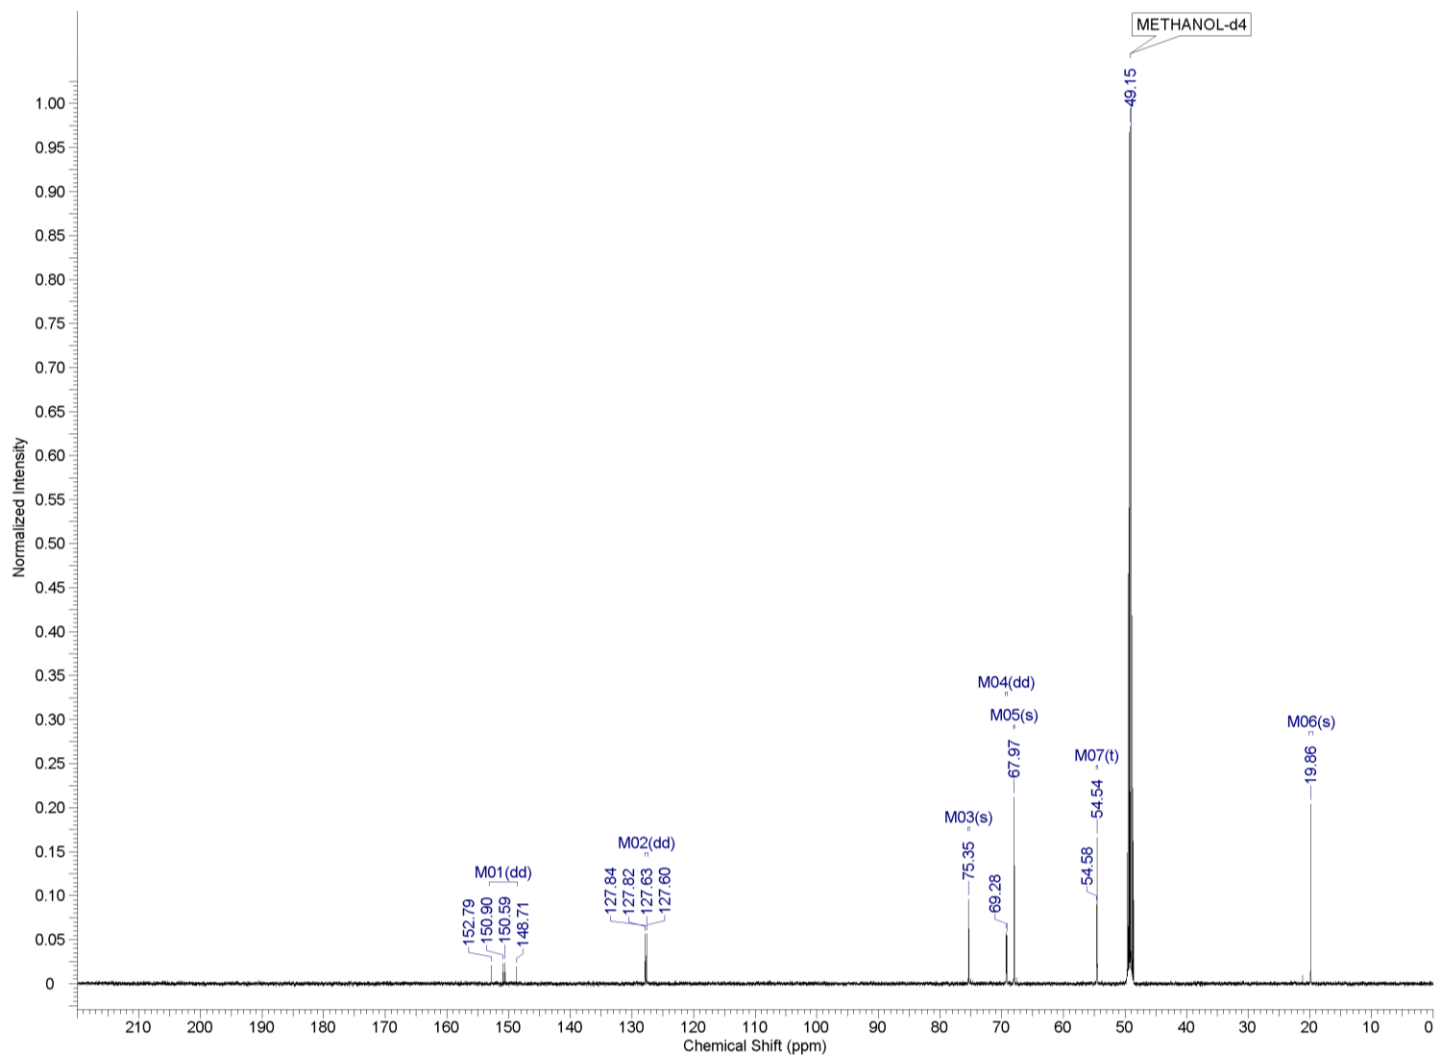

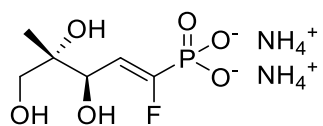

3

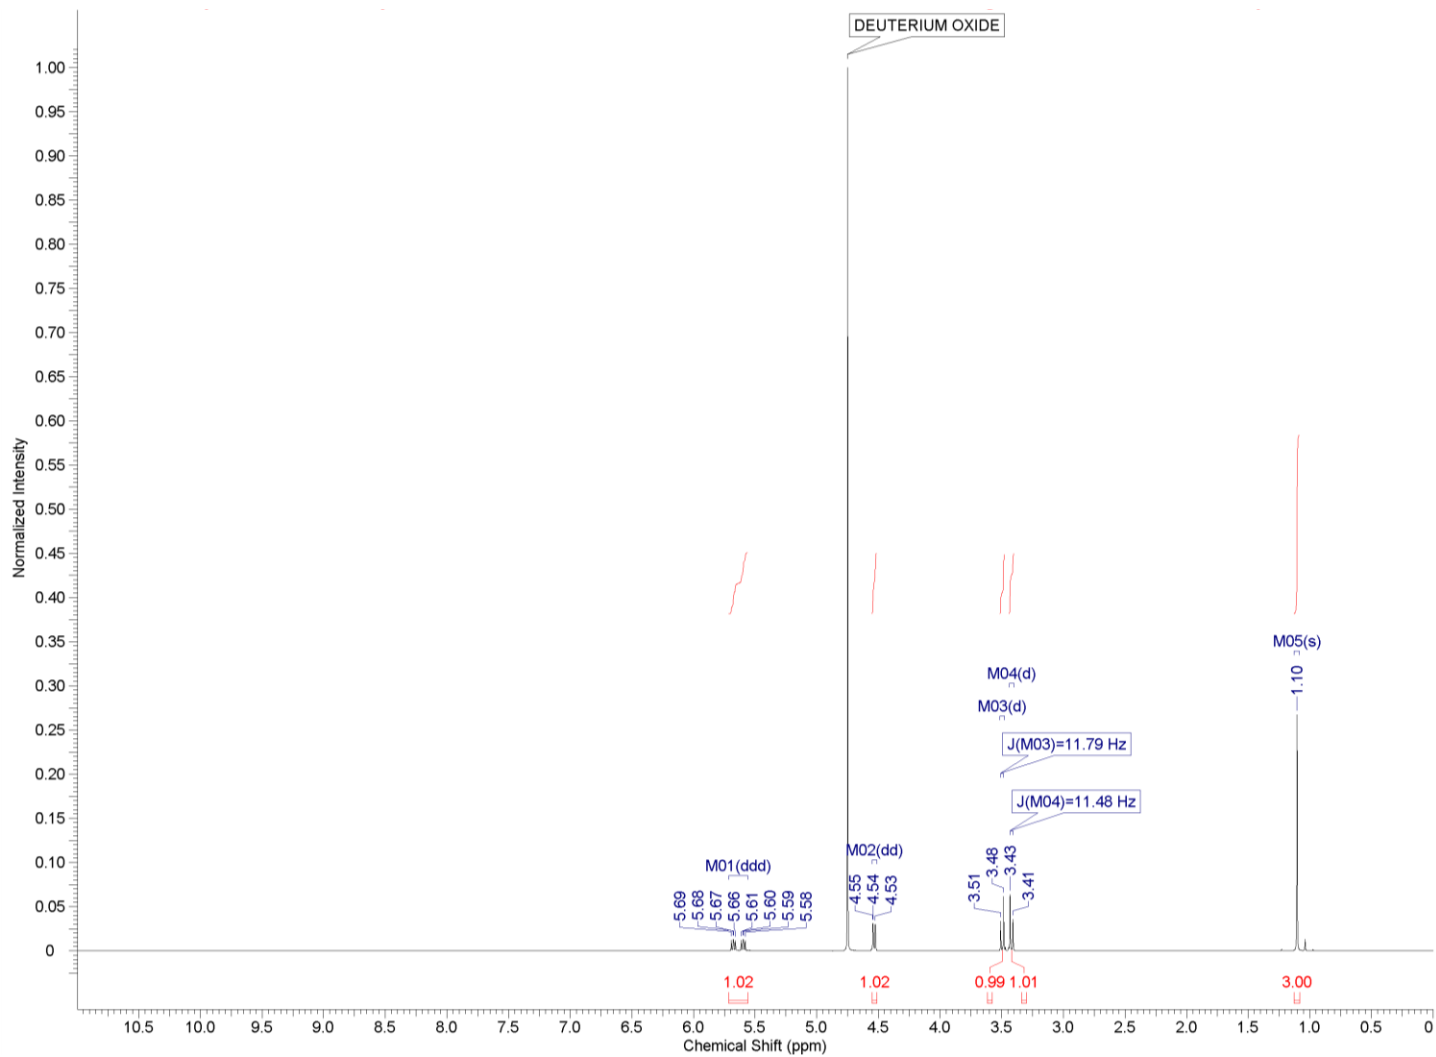

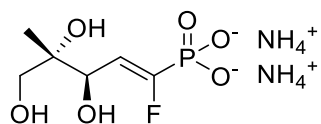

3

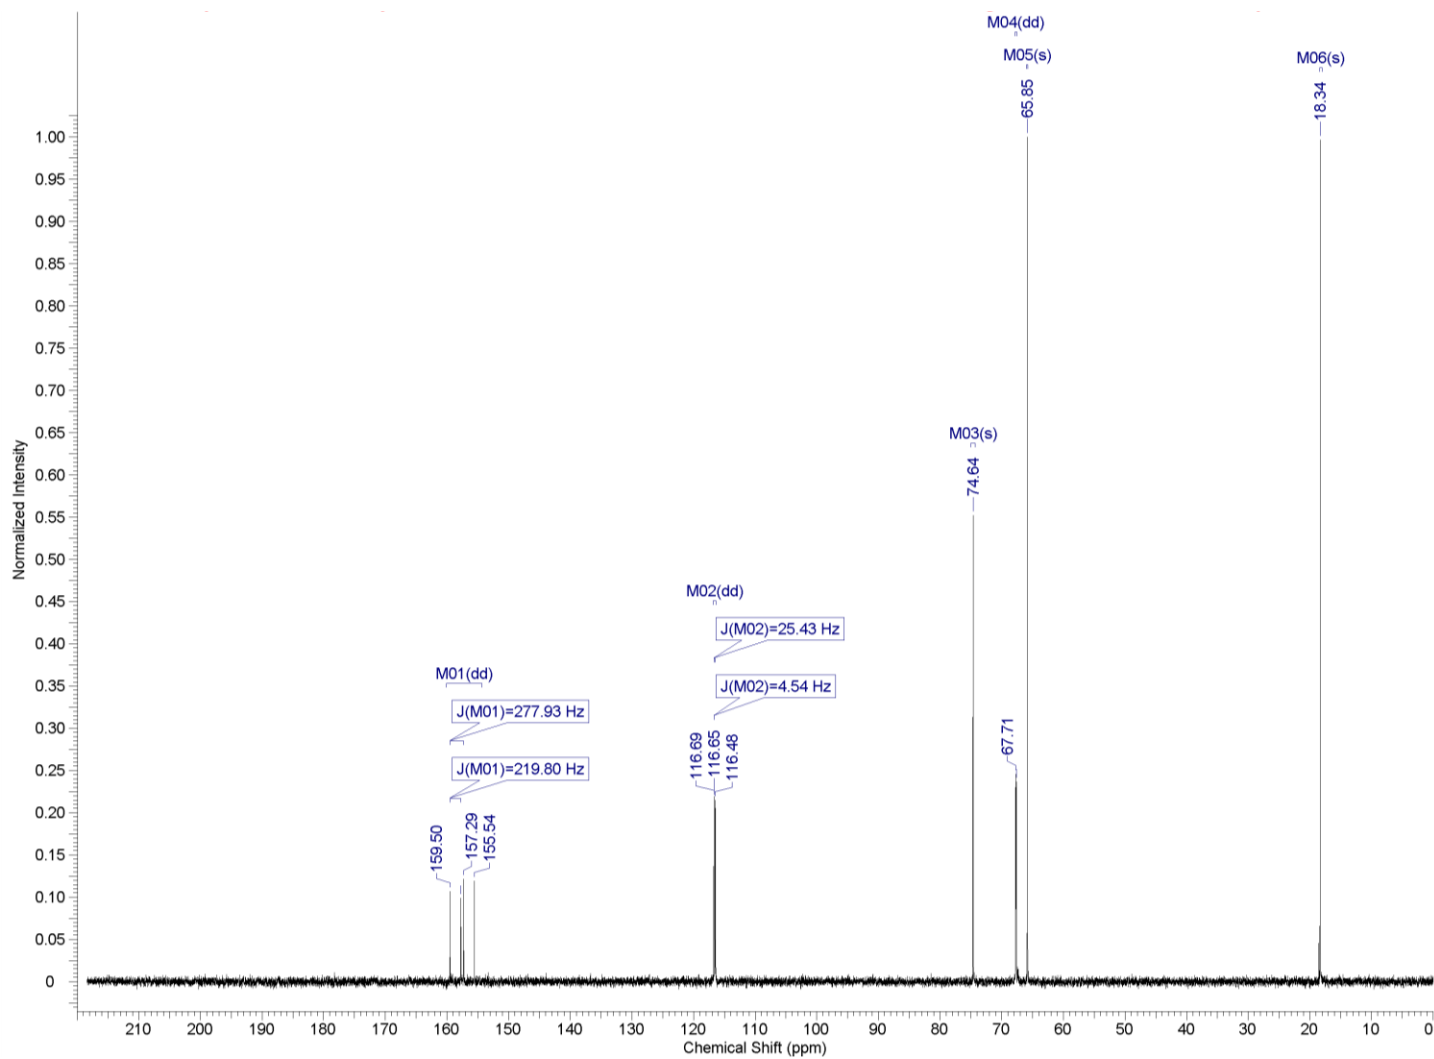

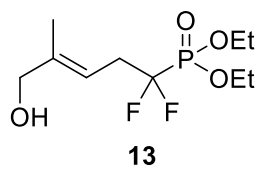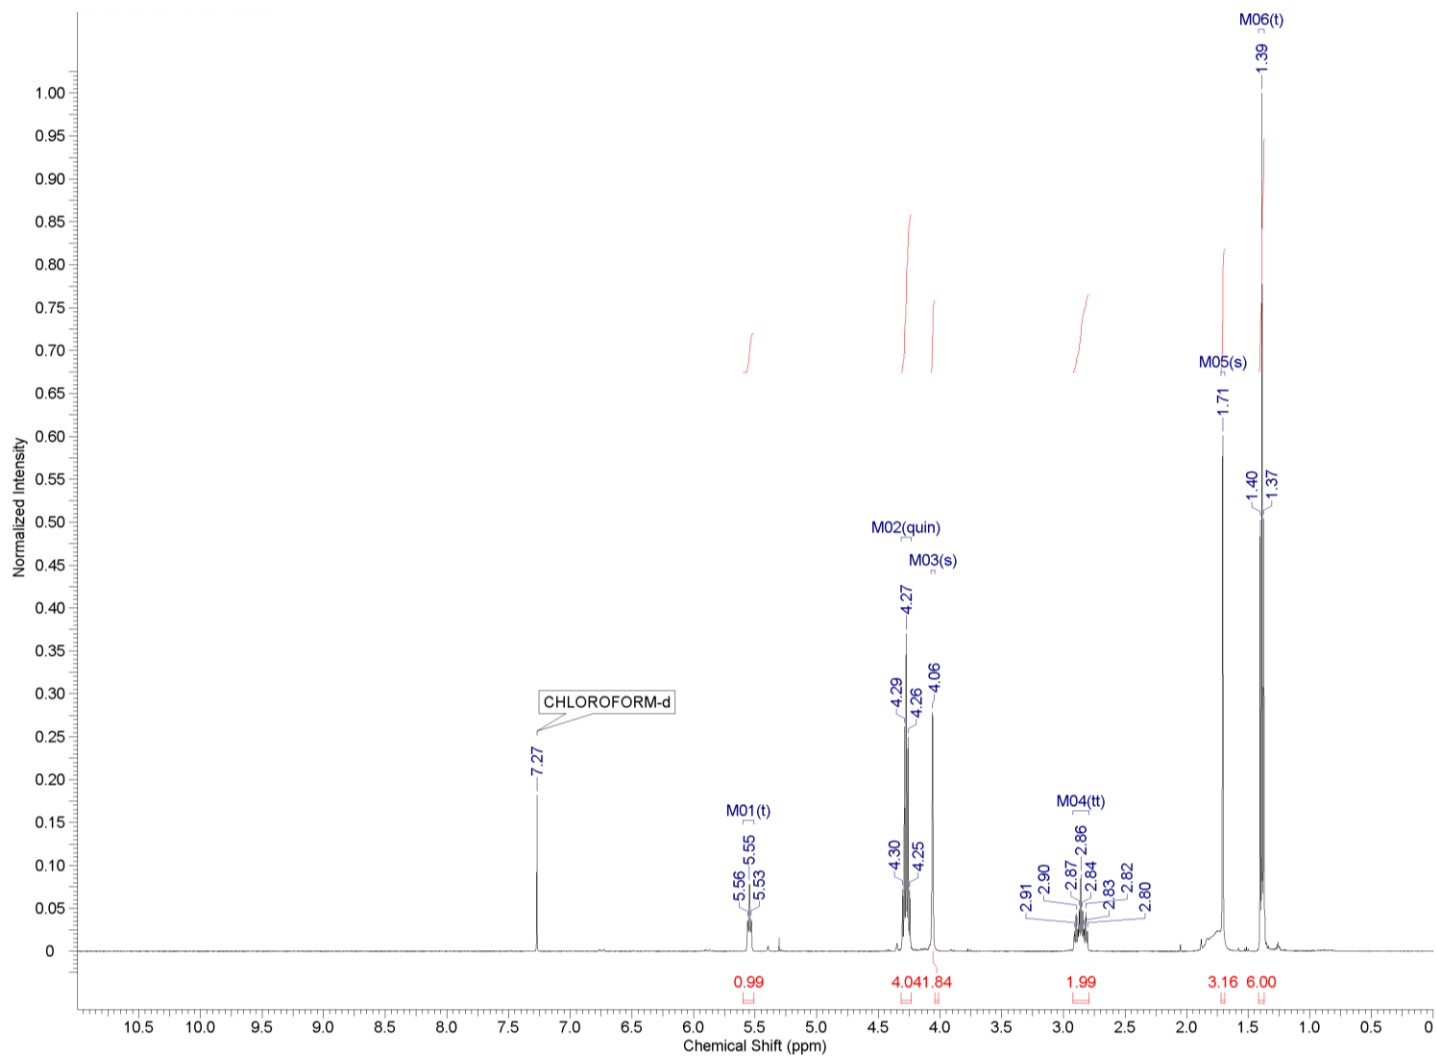

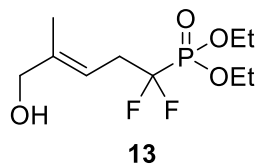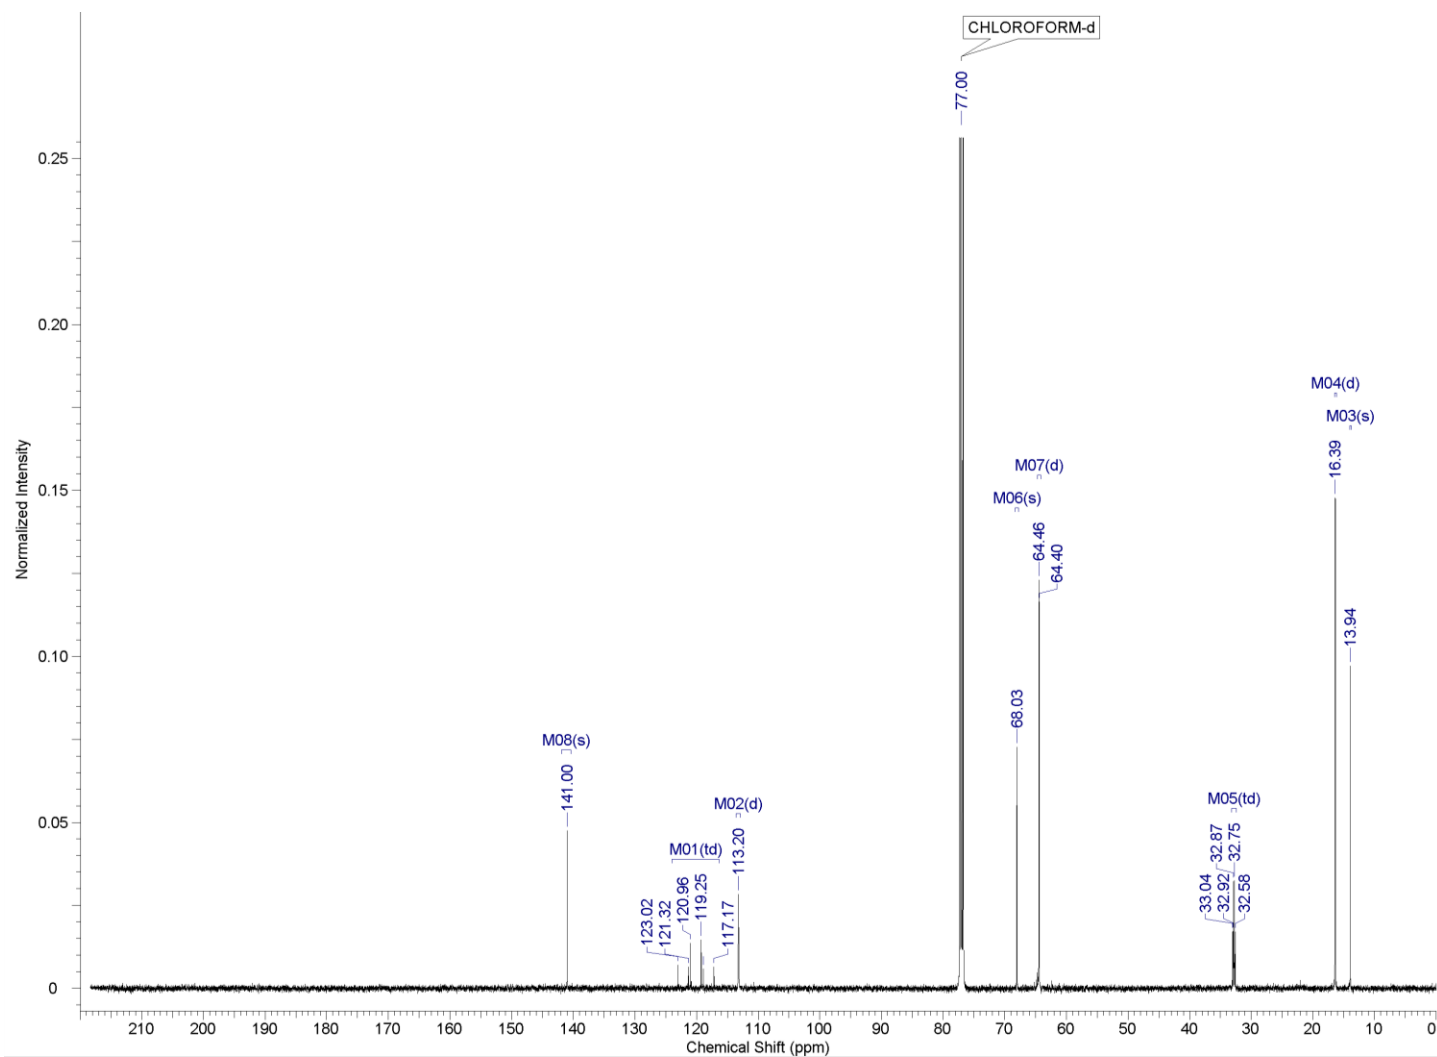

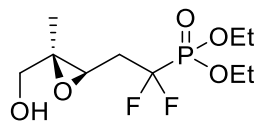

14

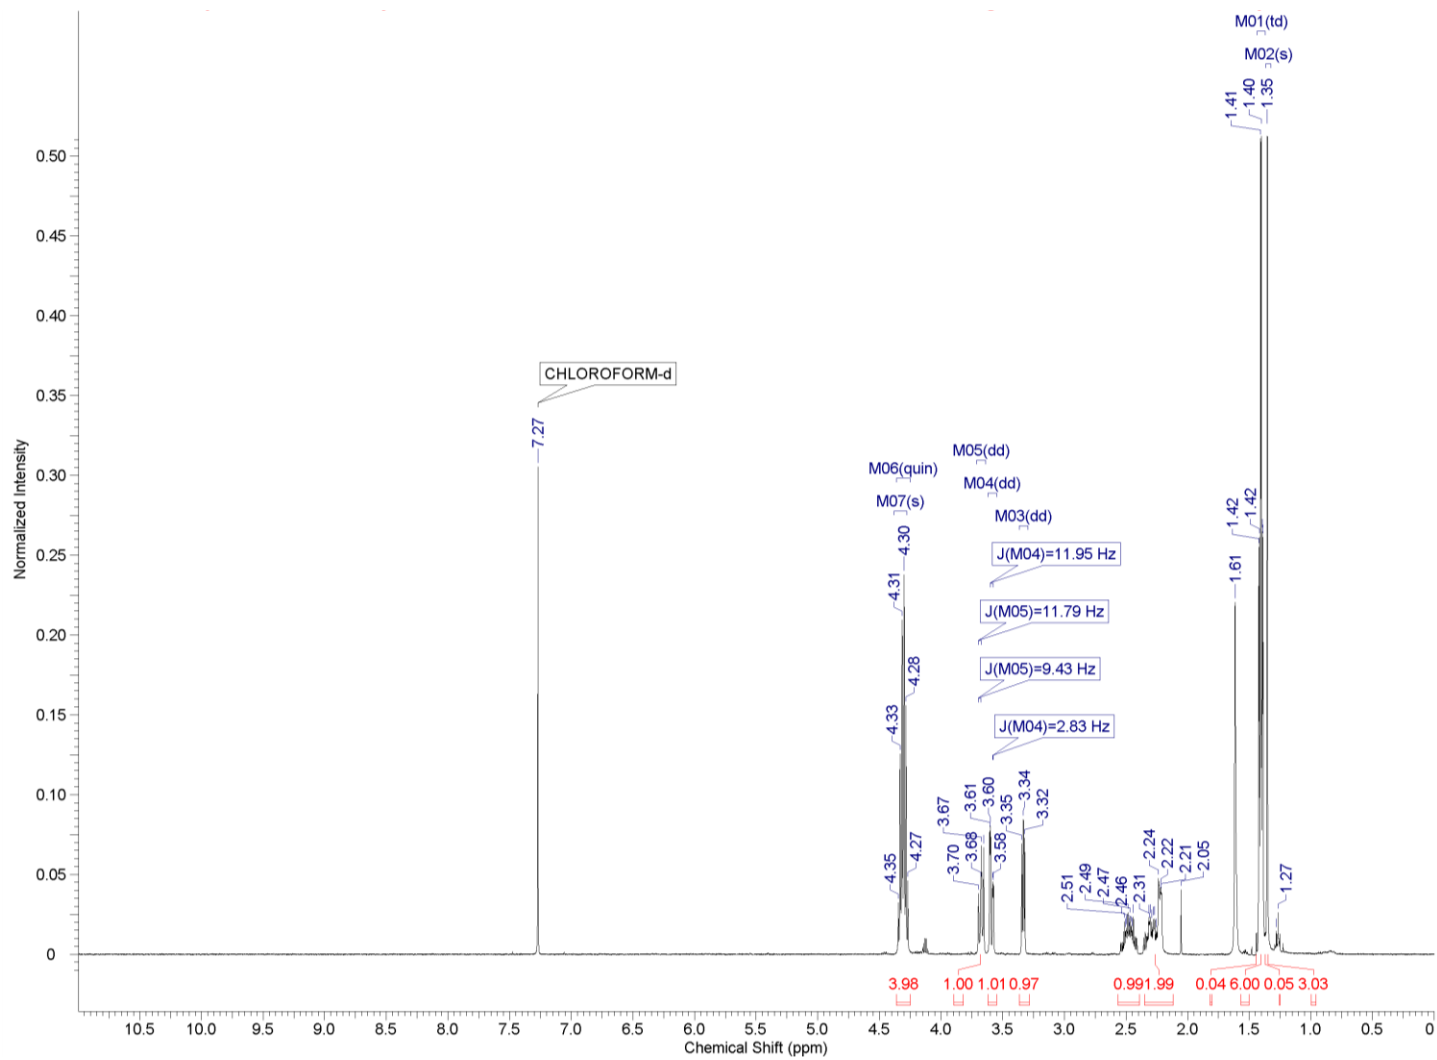



14

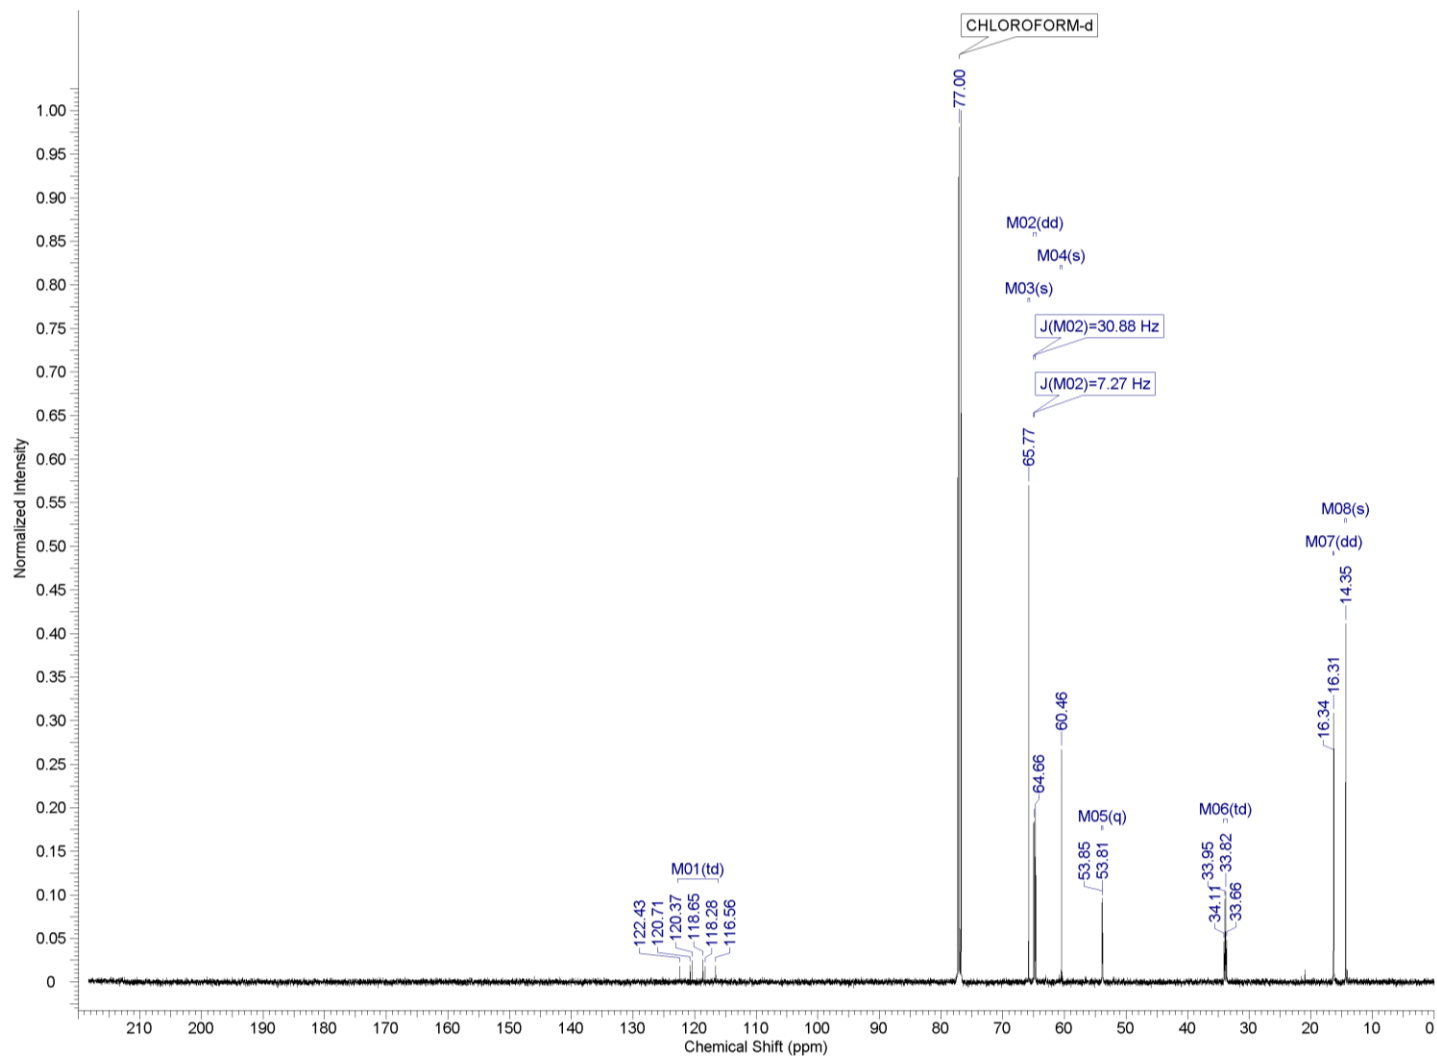

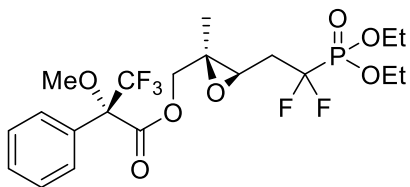

Mosher's Acid Derivative of 14

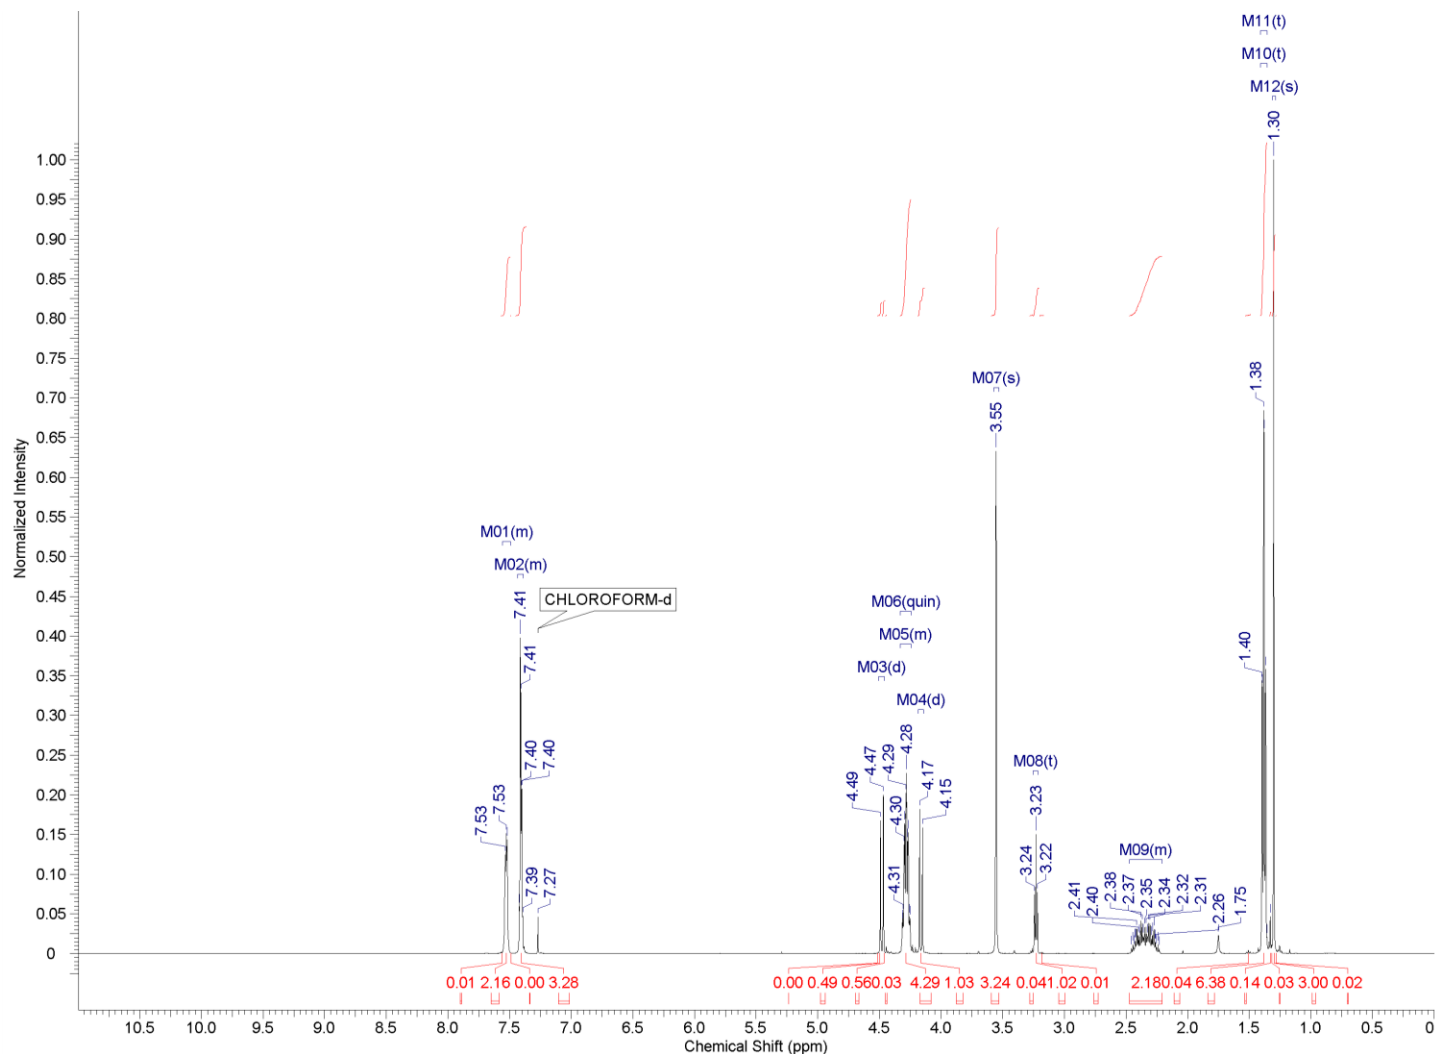

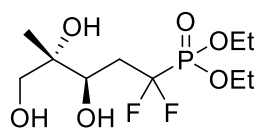

15

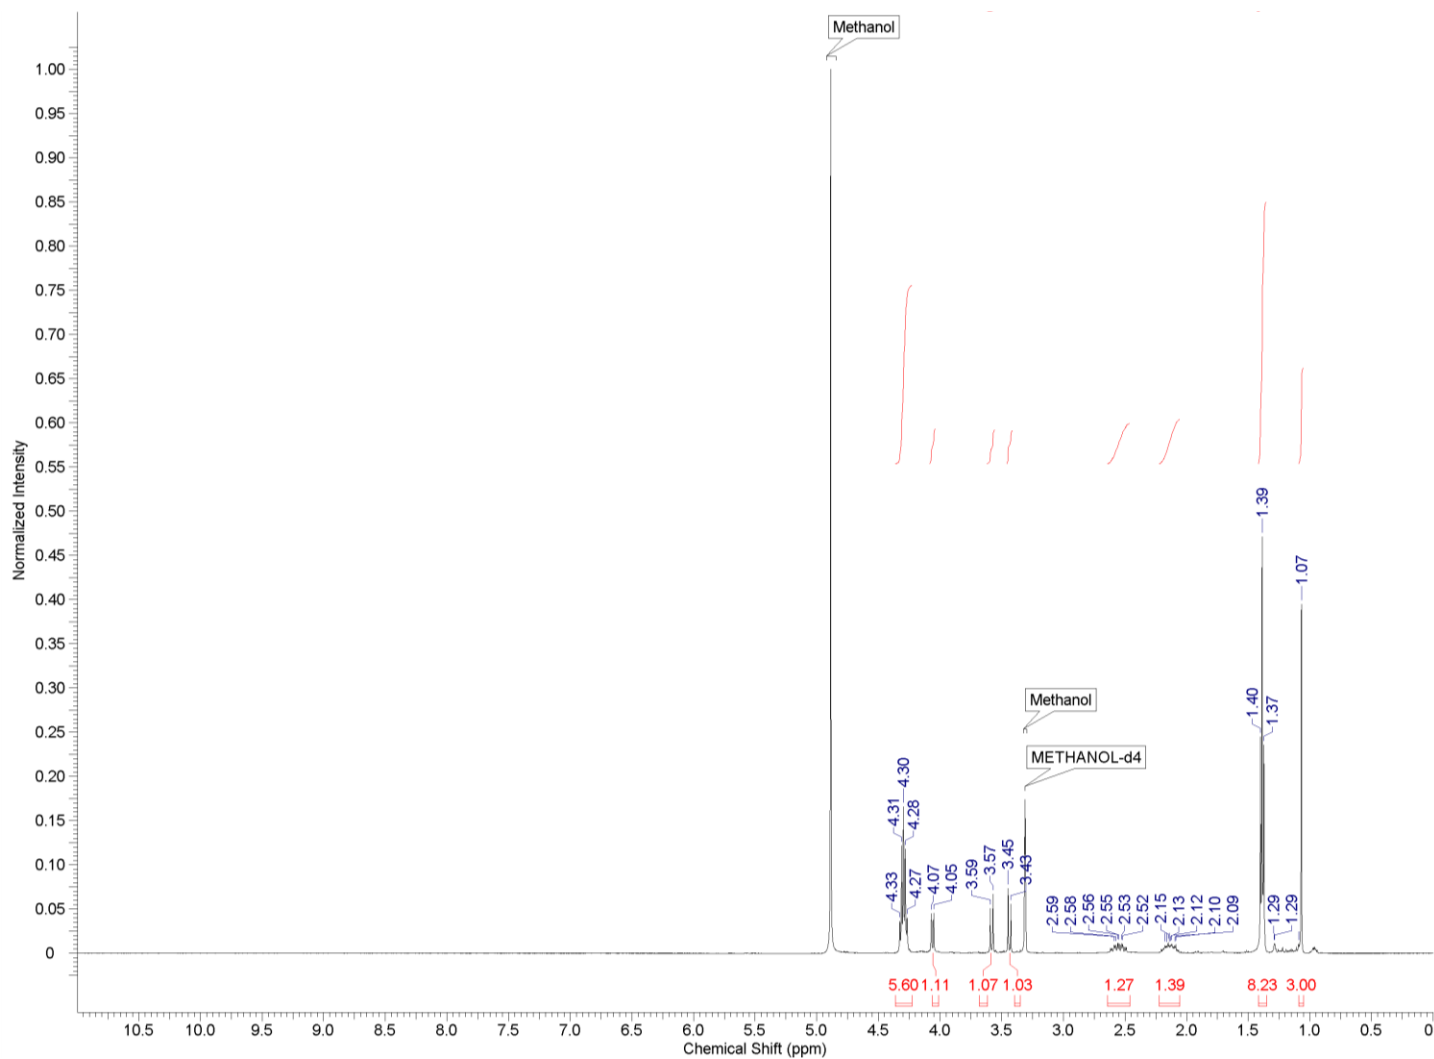

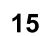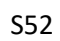

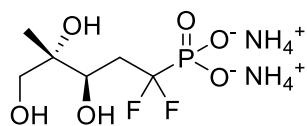

4

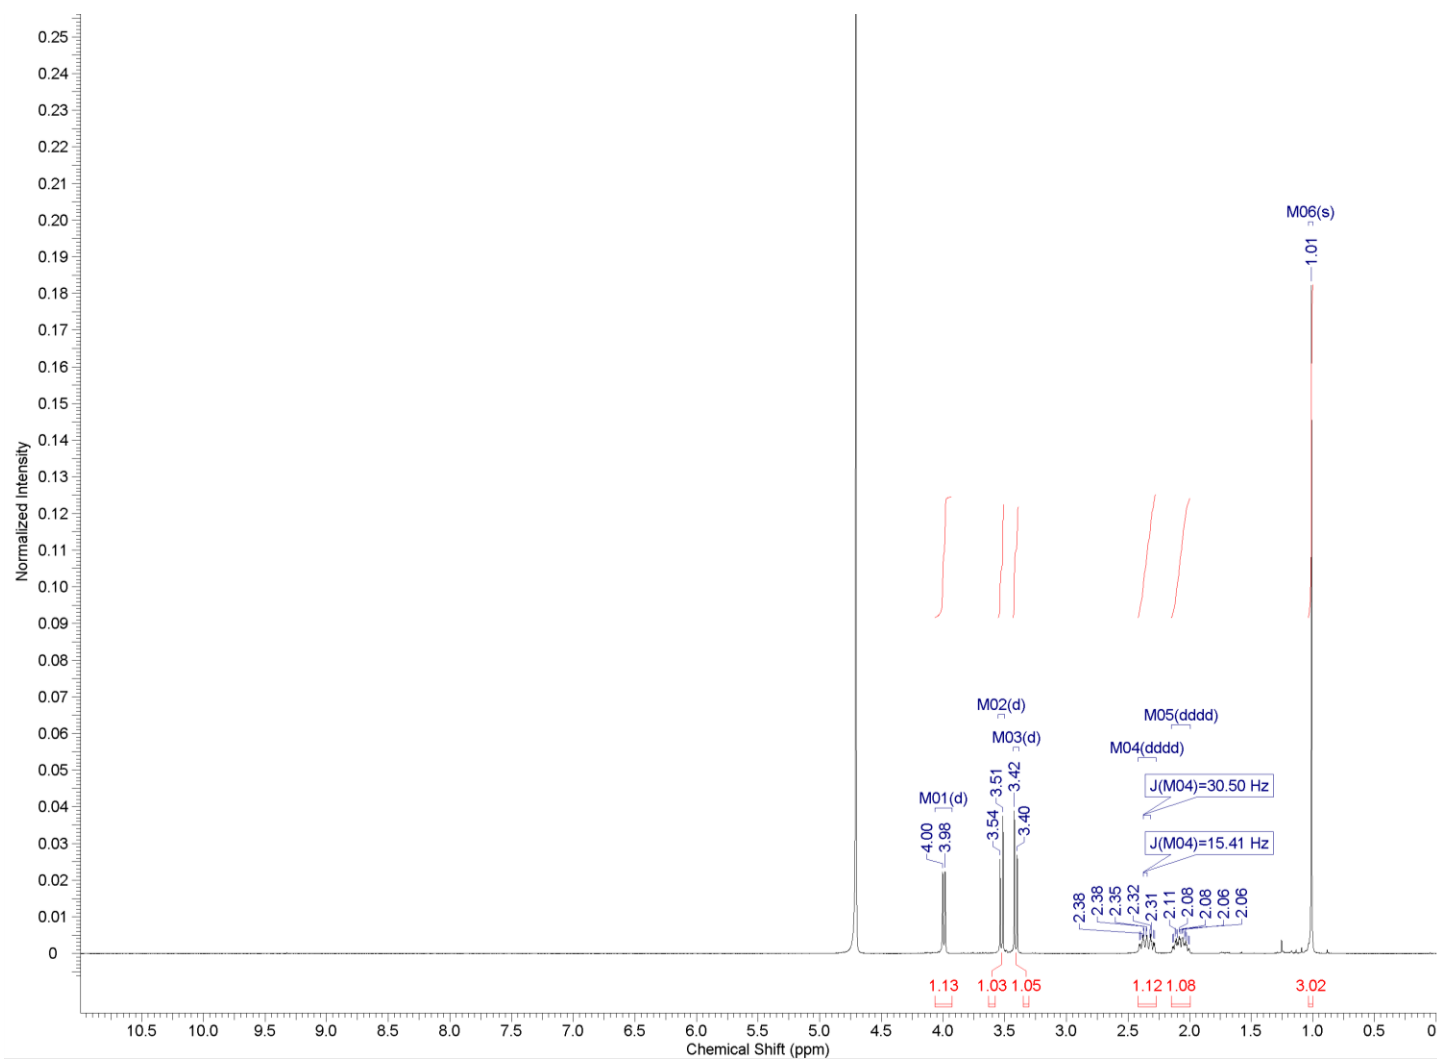



4

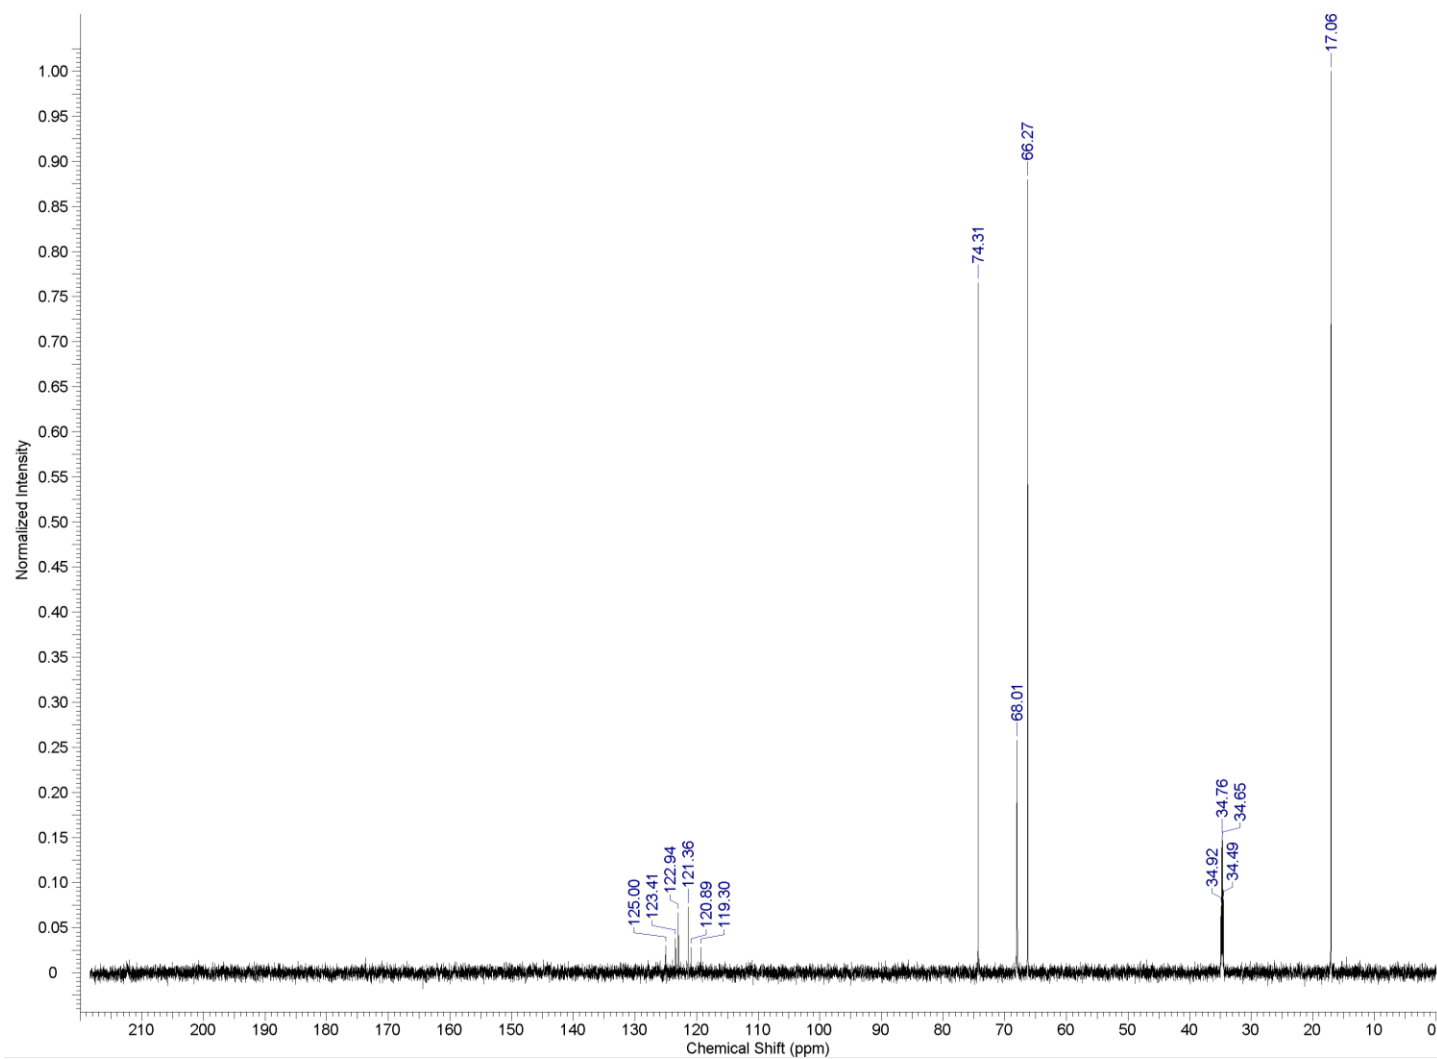

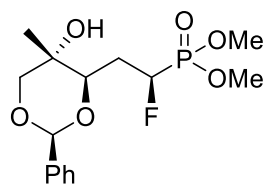

**16a**

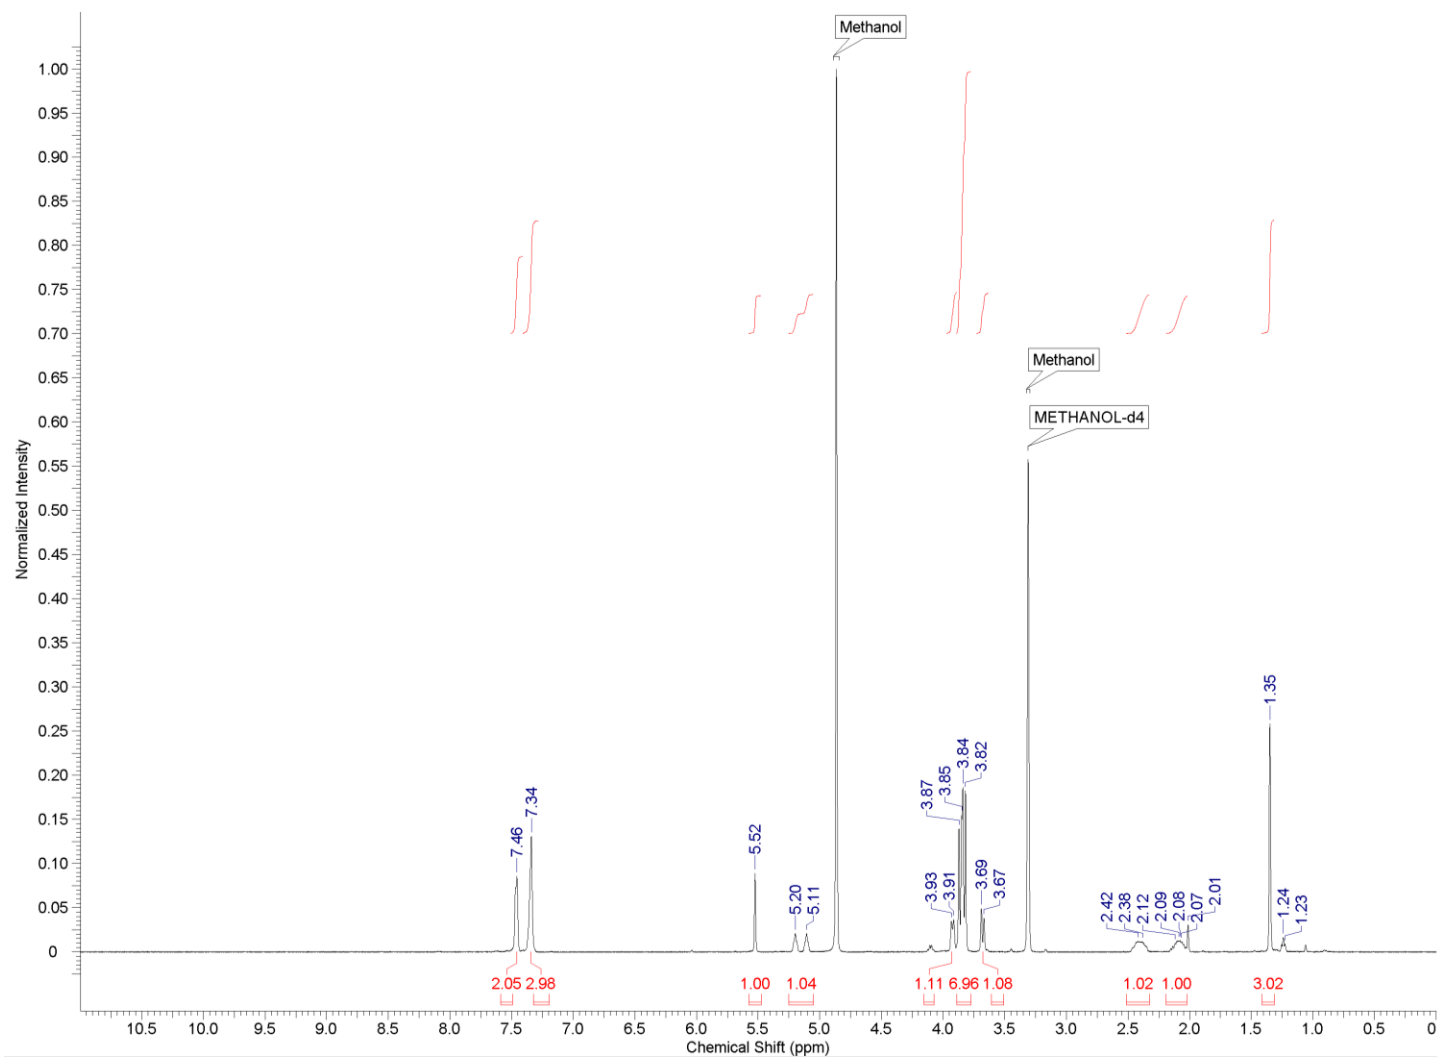



**16a**

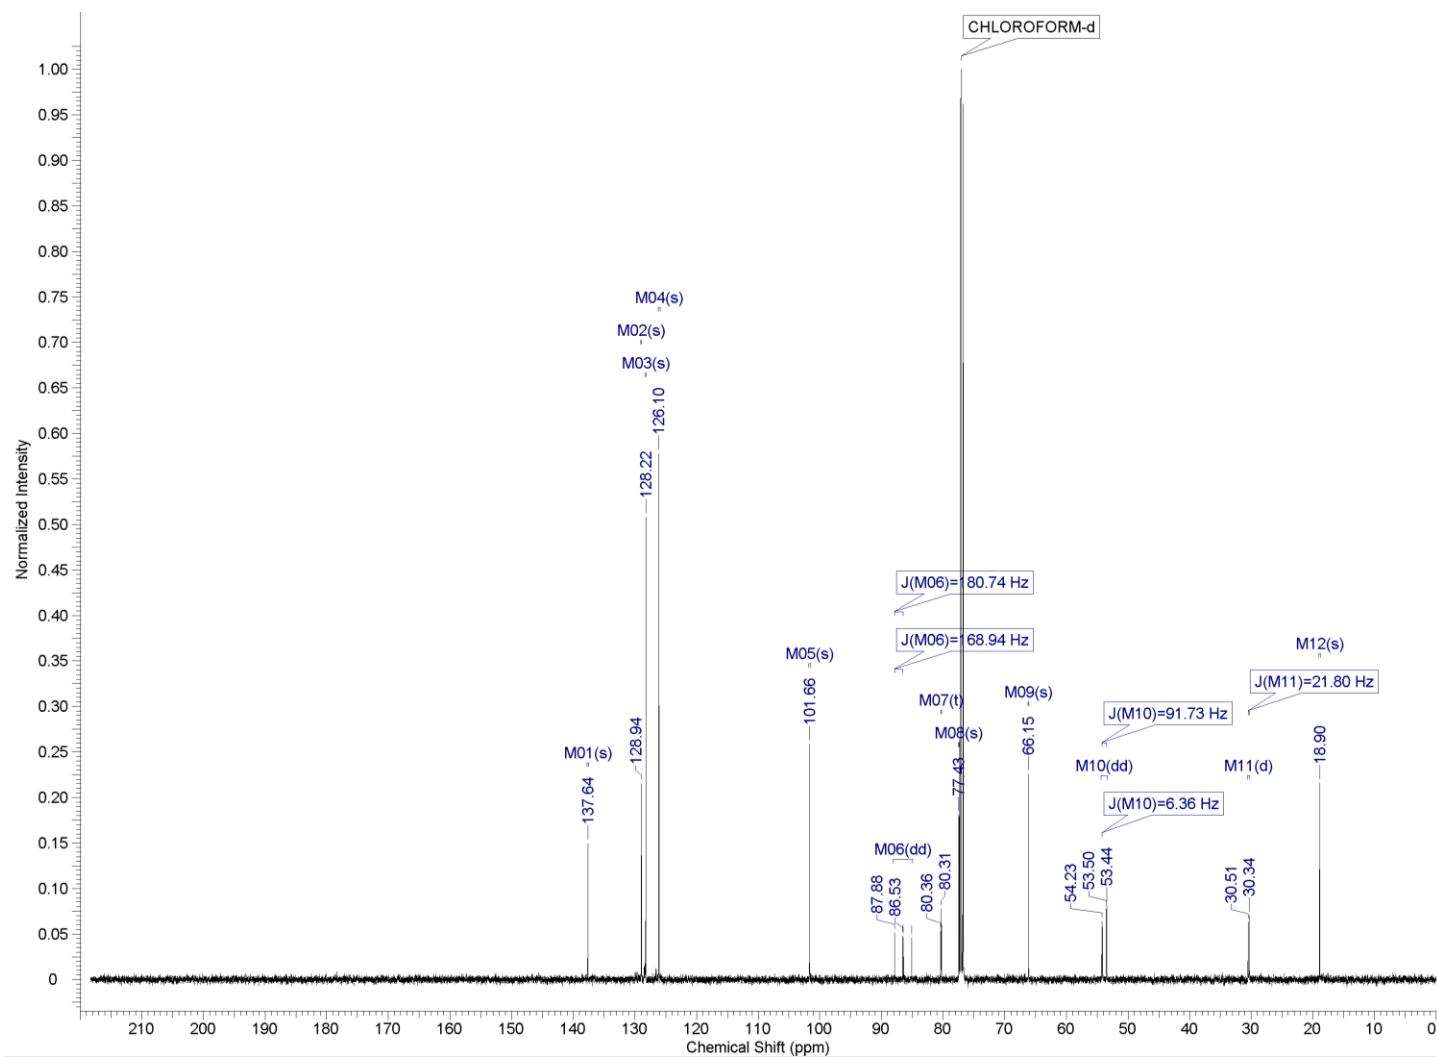

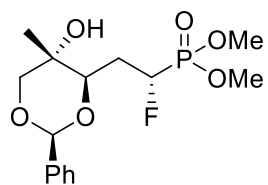

**16b**

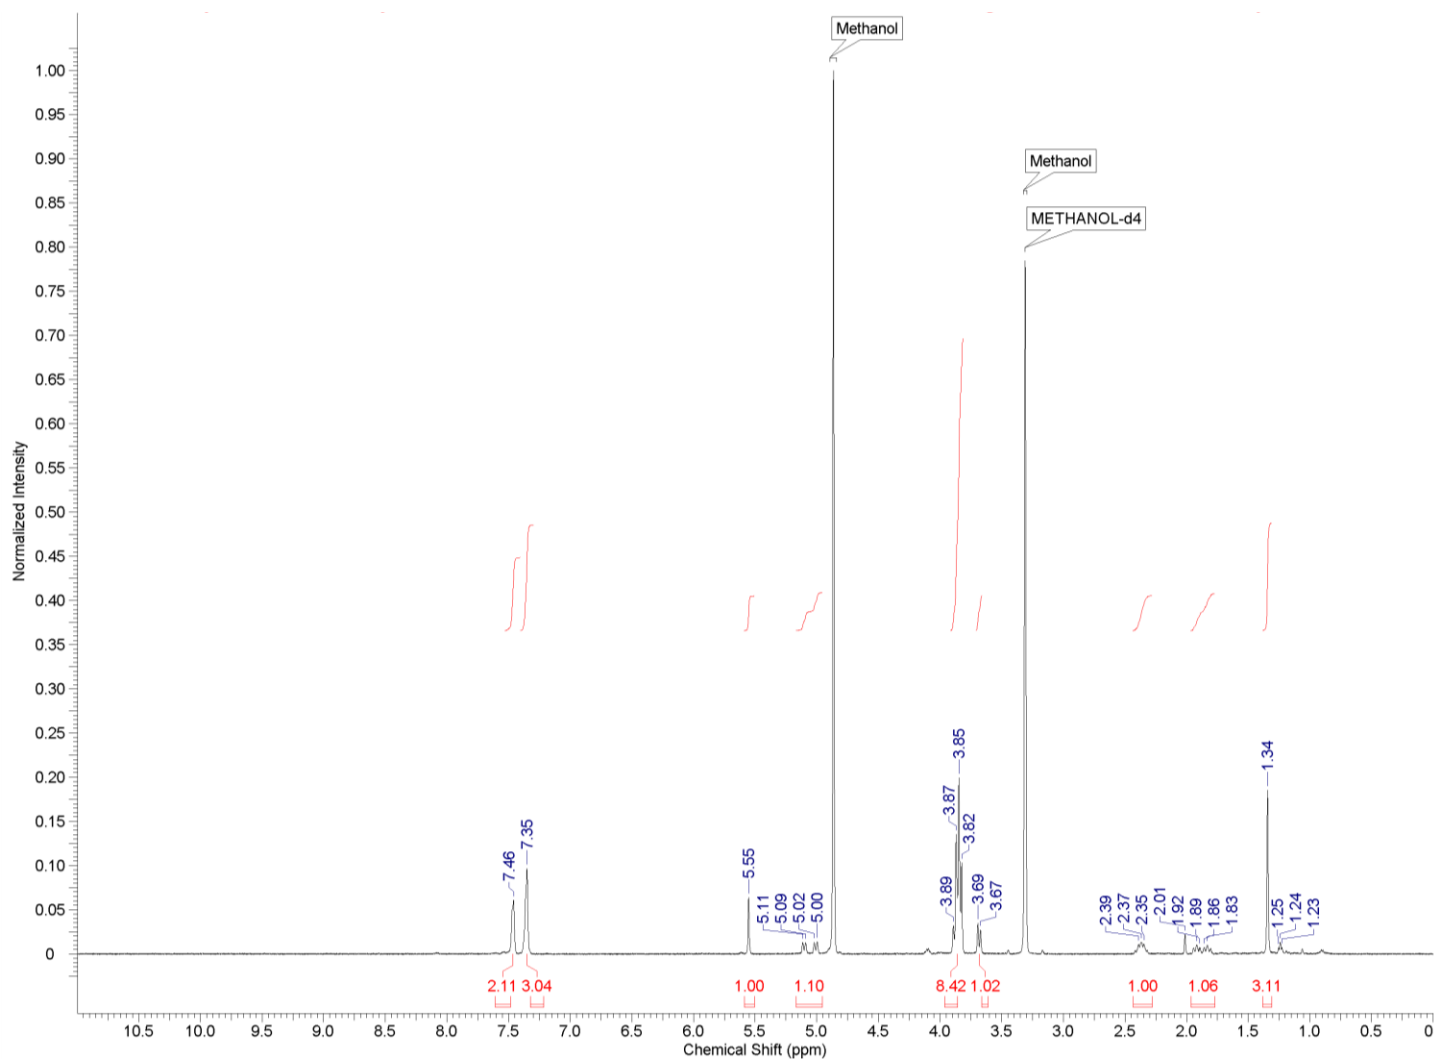

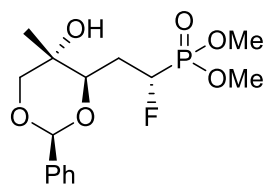

**16b**

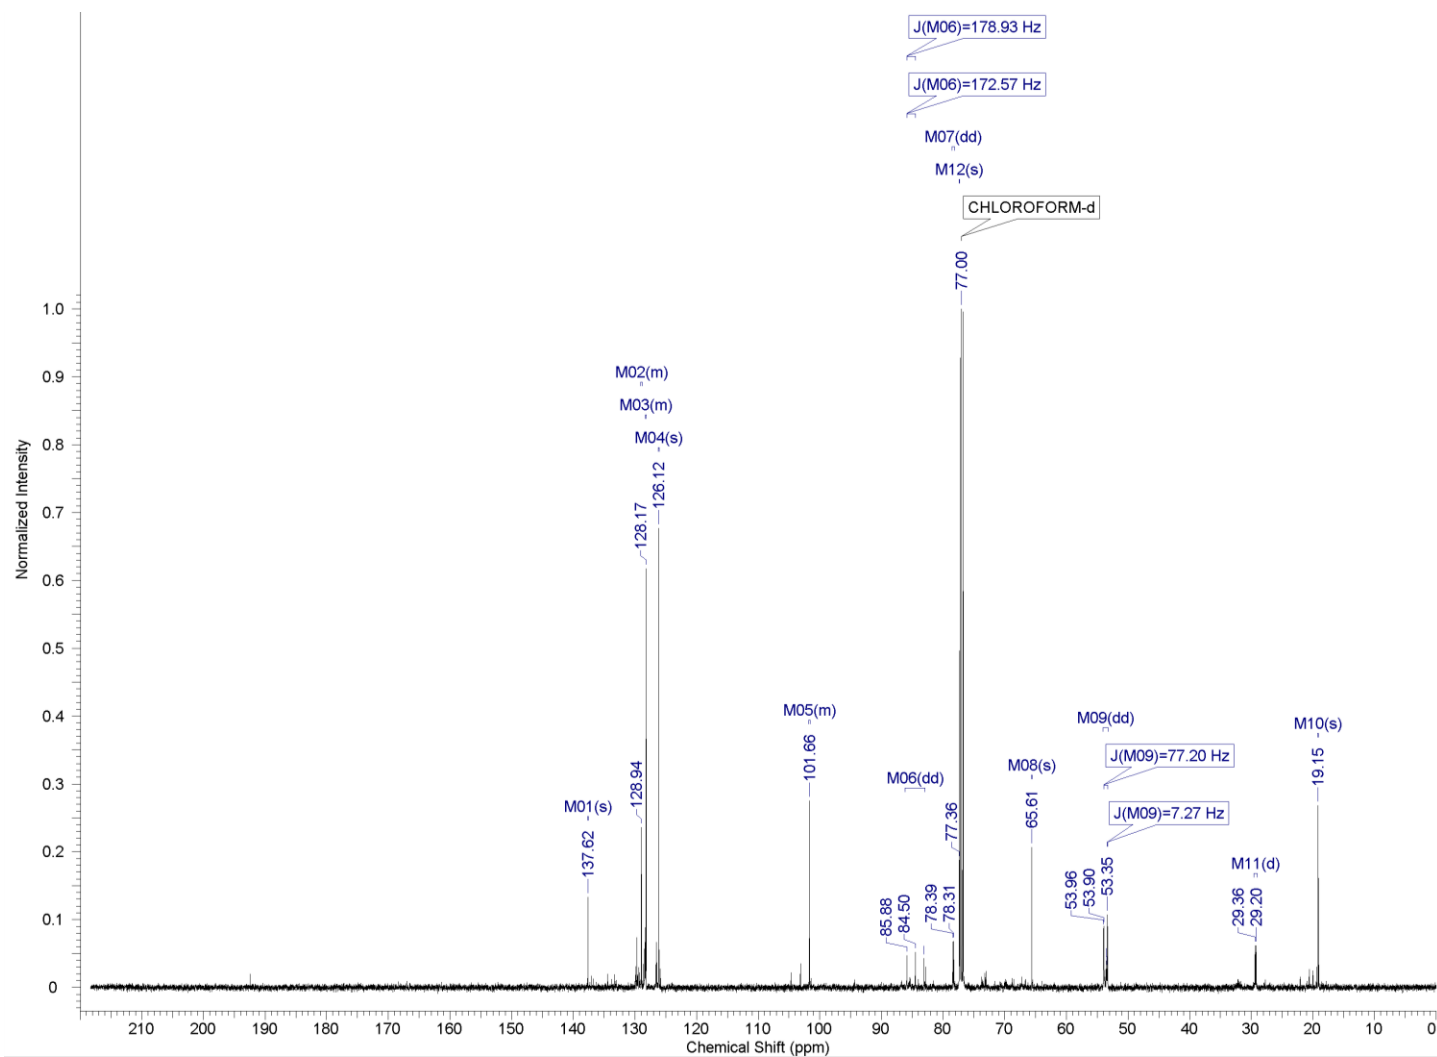

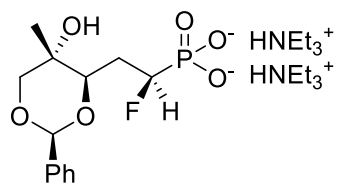

**18a**

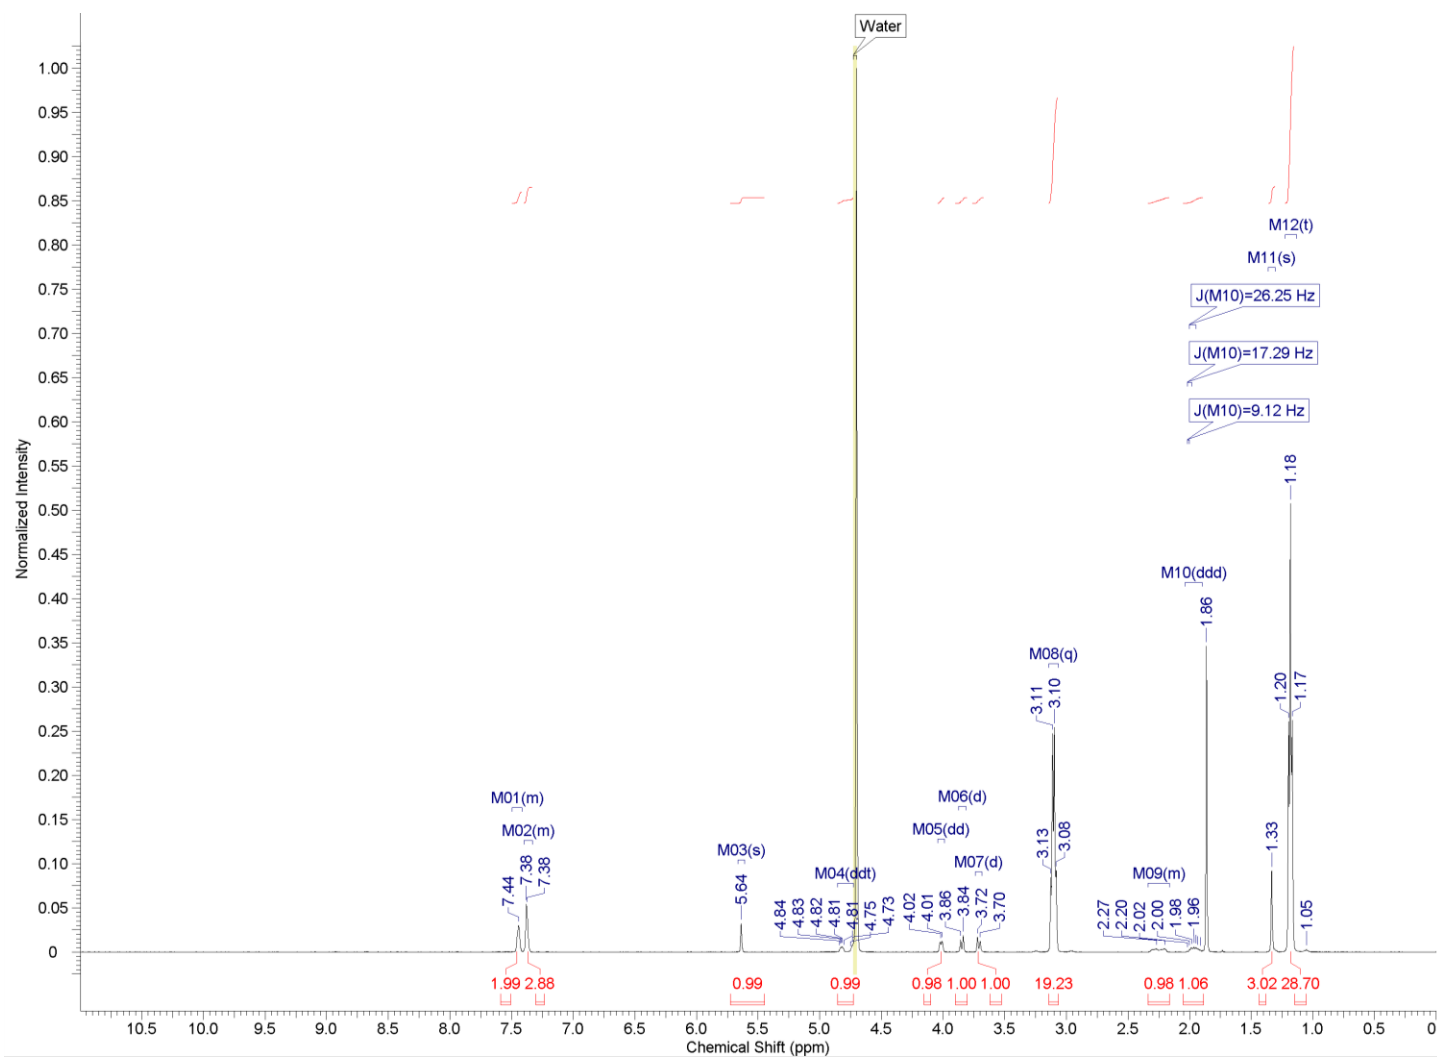

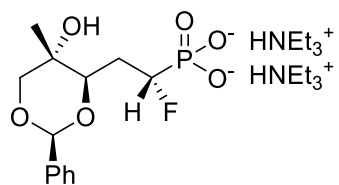

**18b**

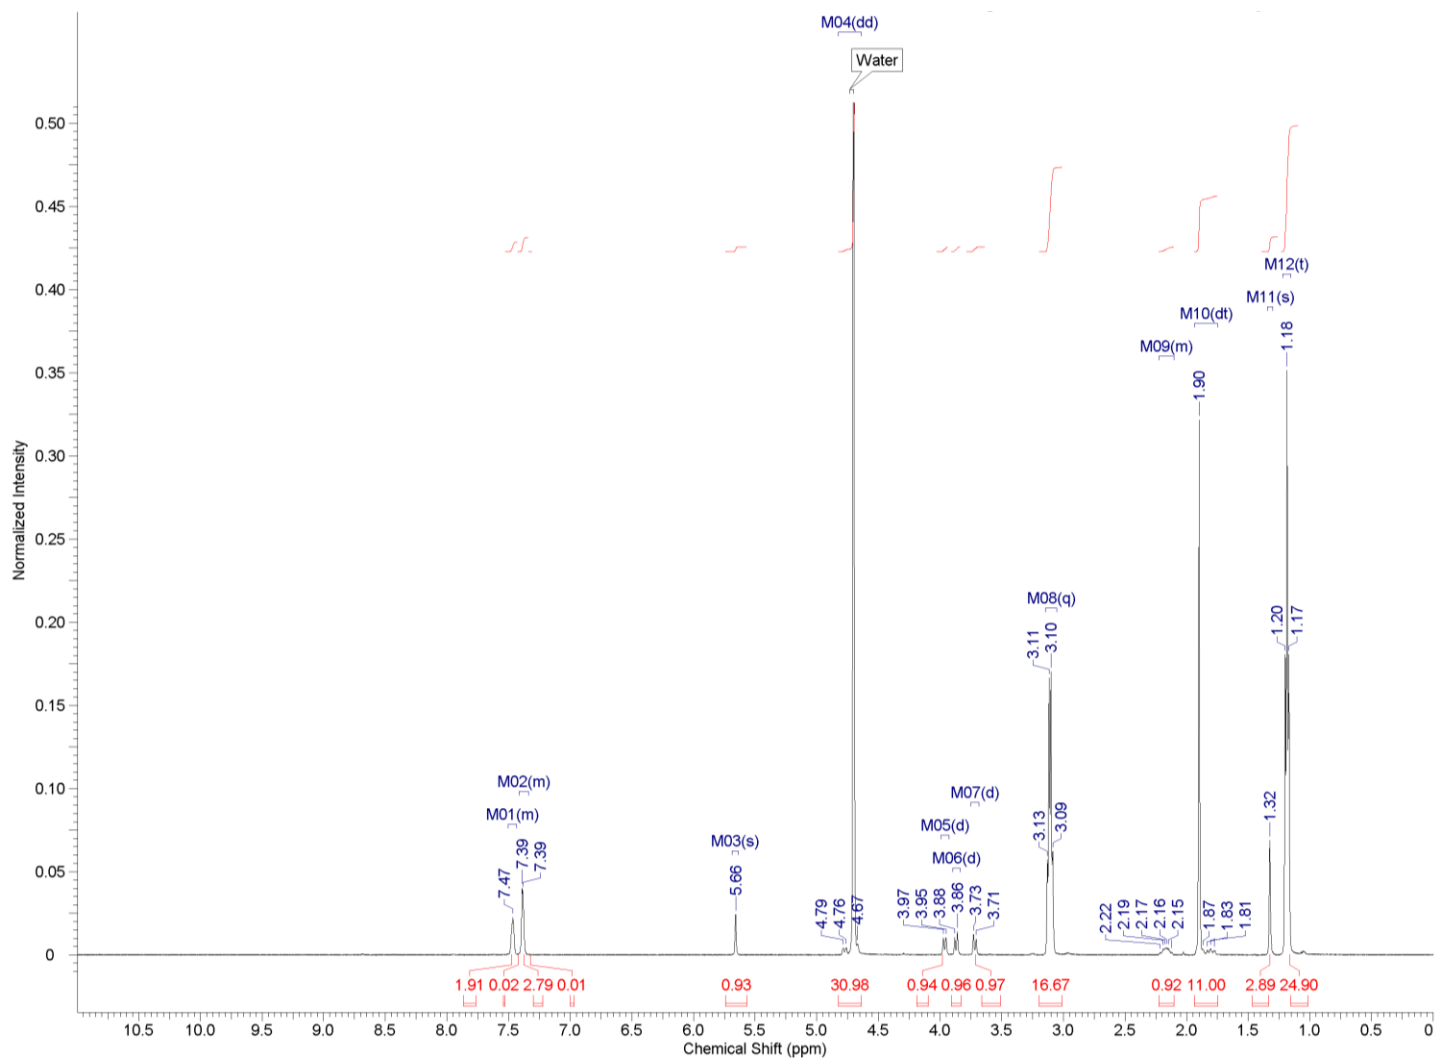

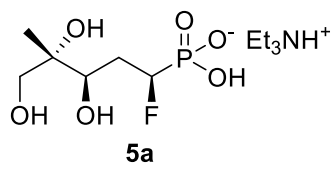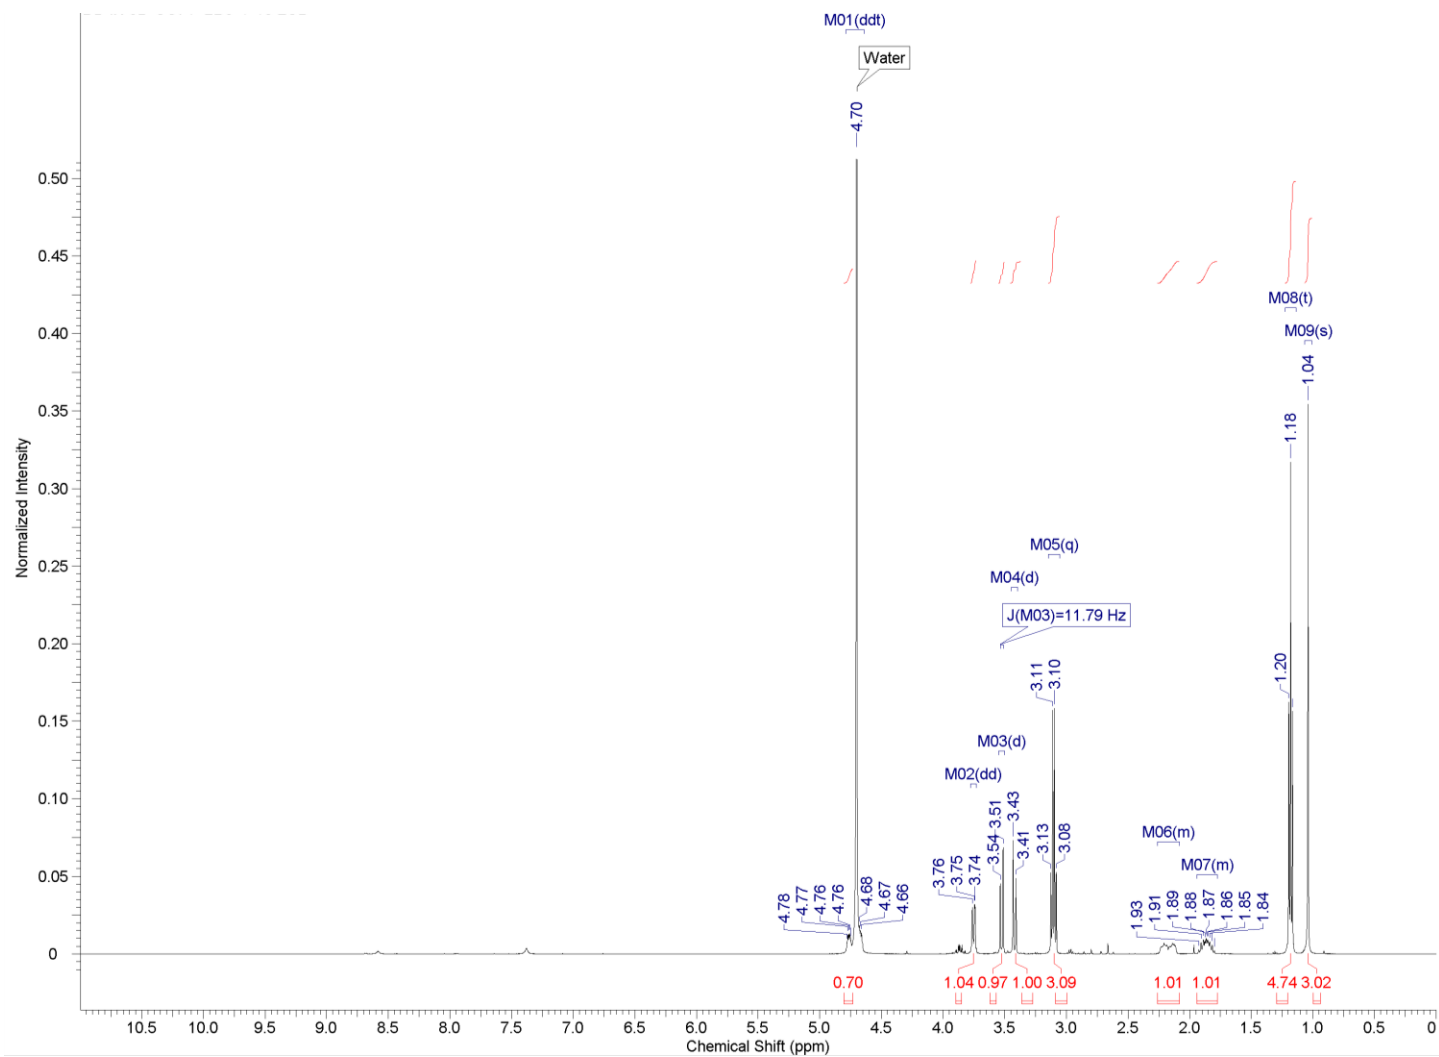

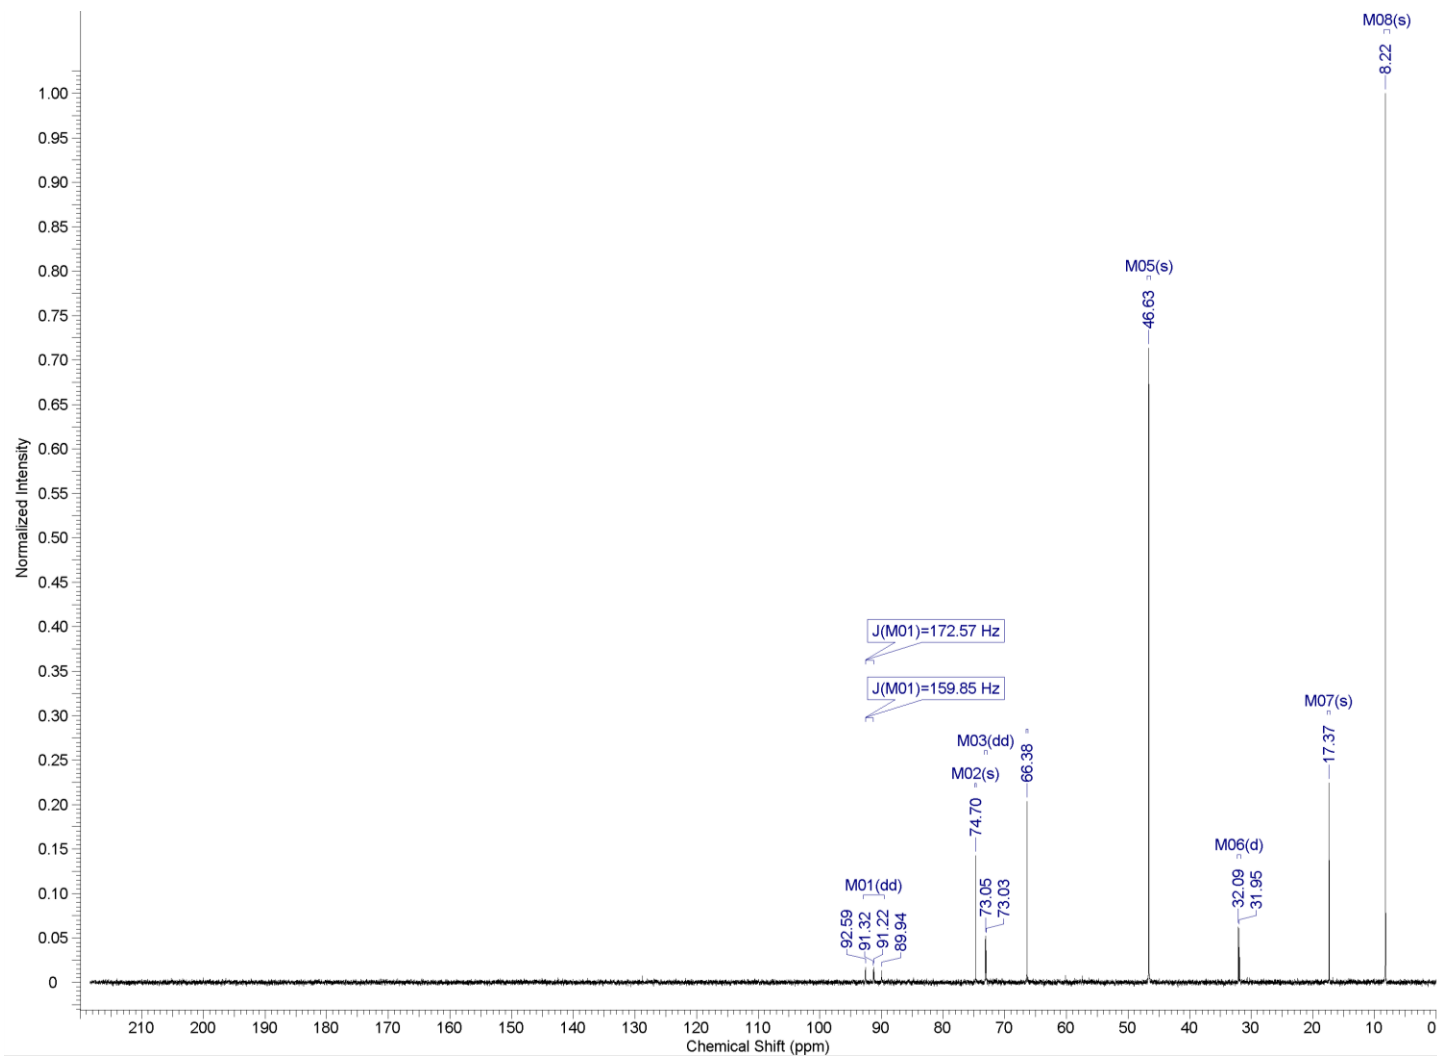

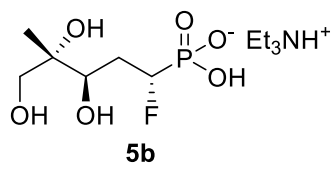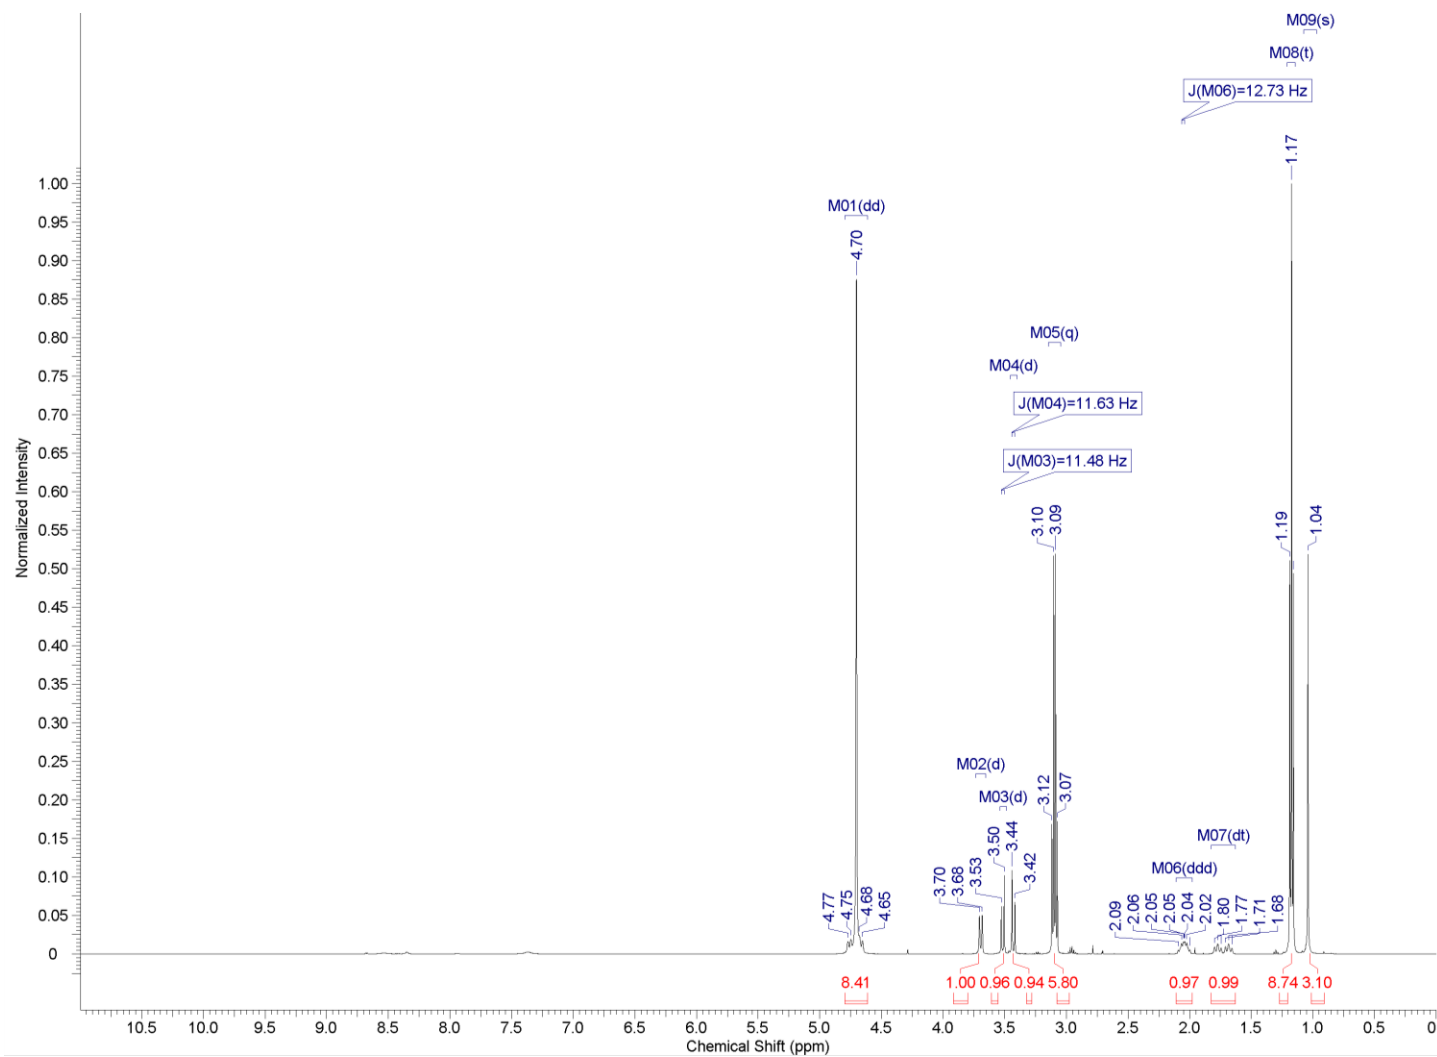

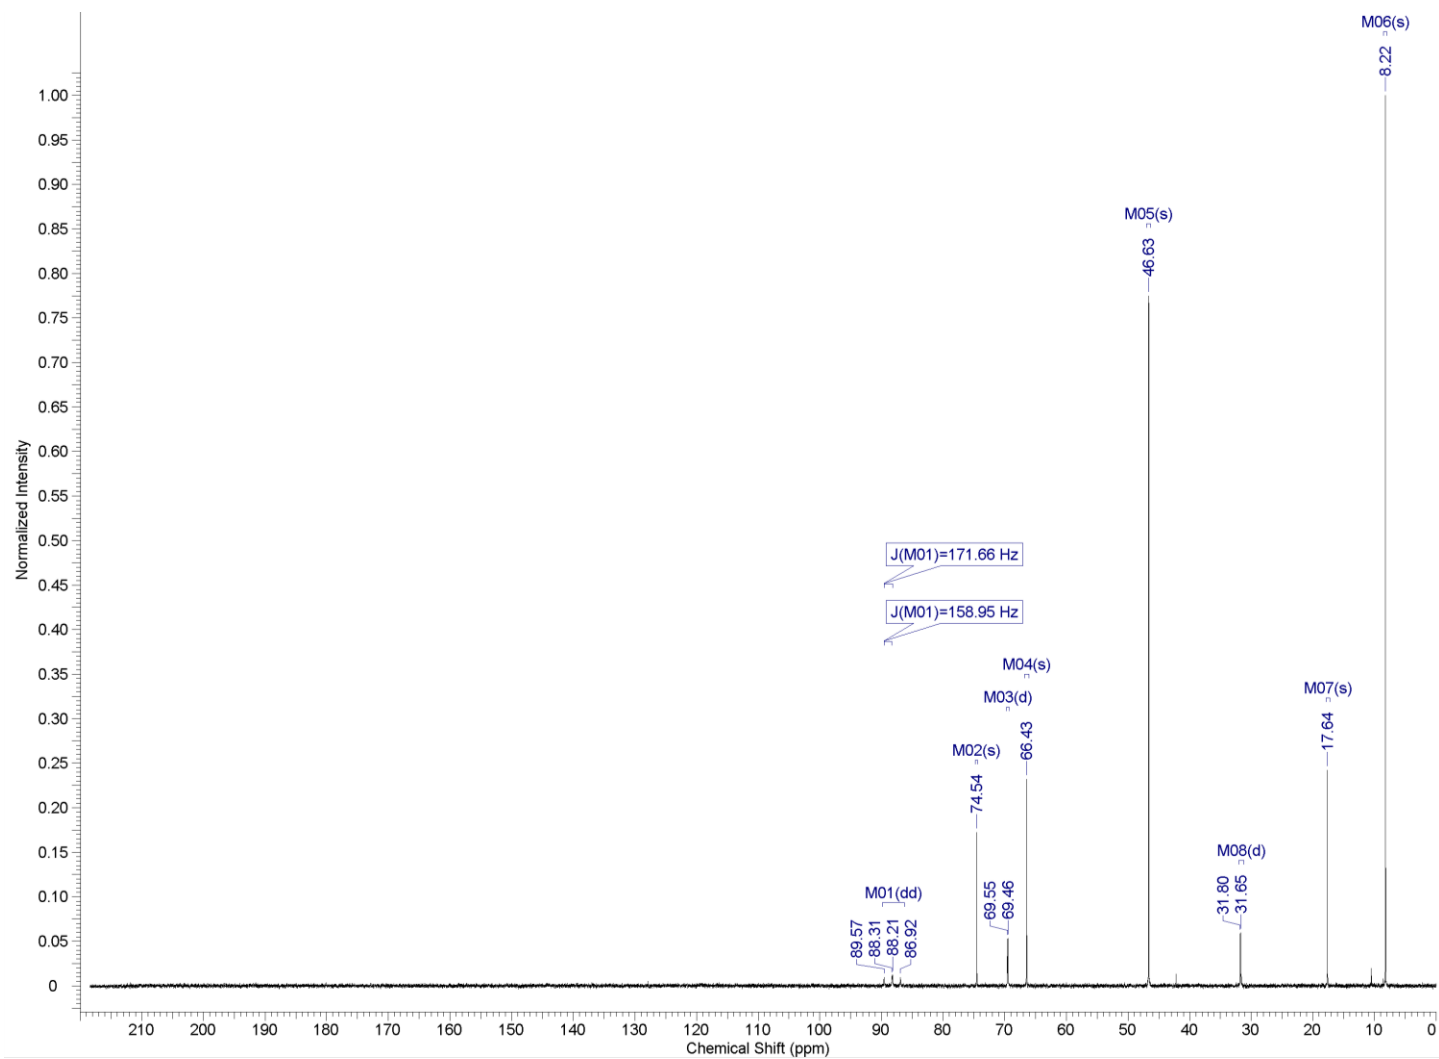

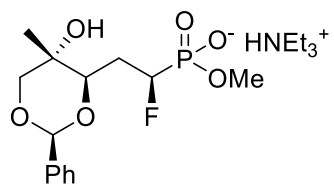

**19a**

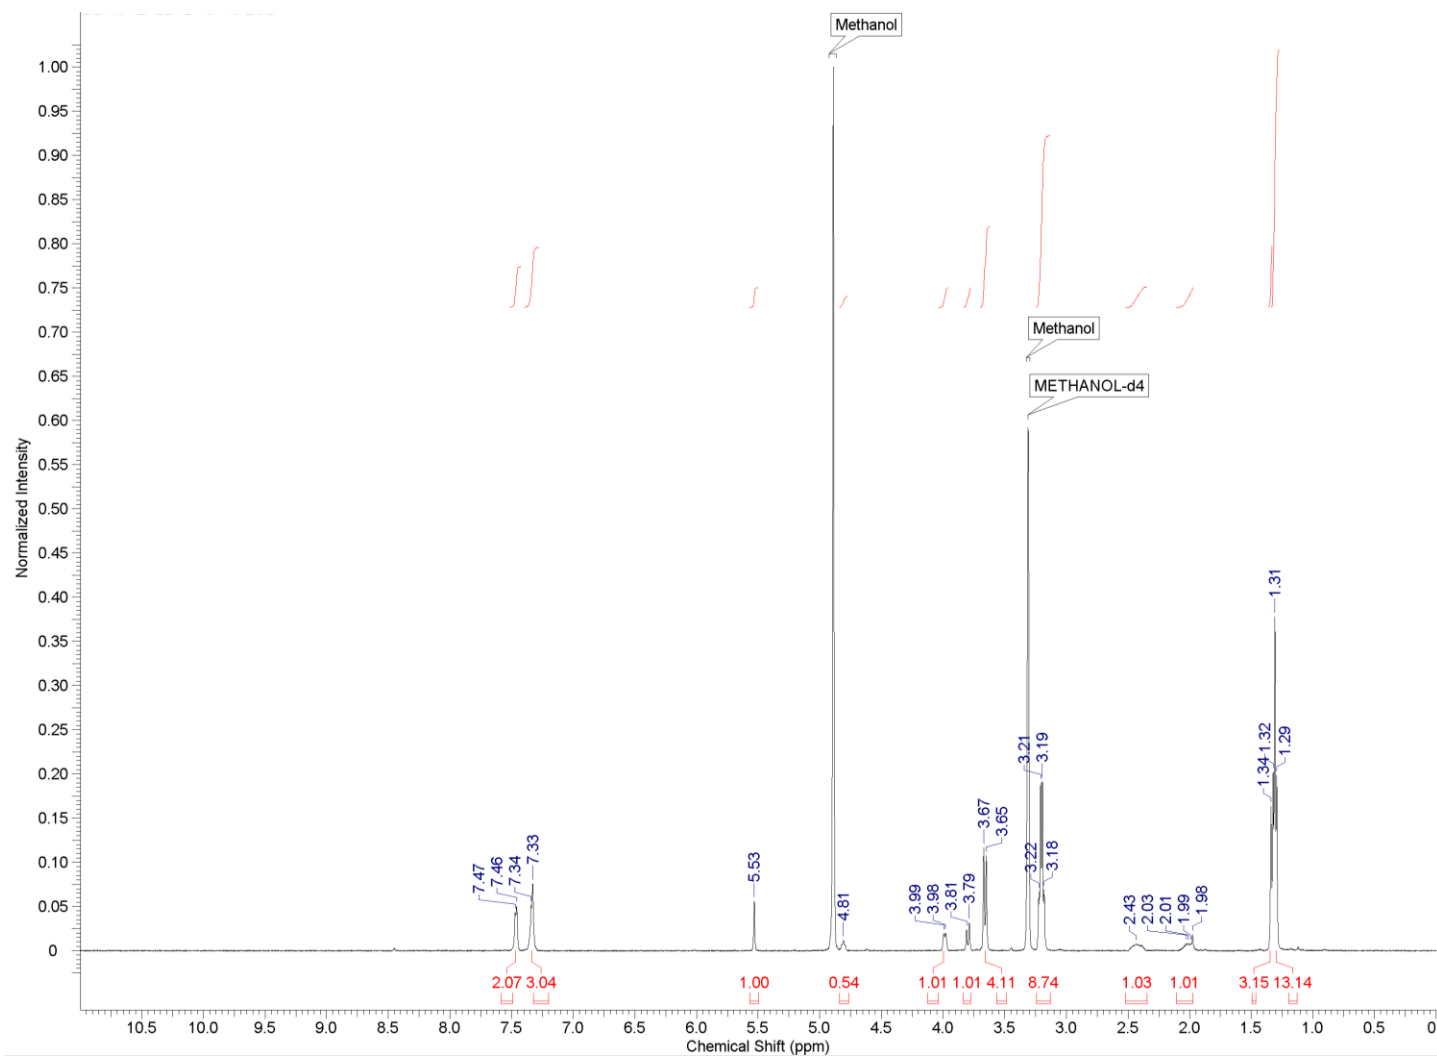



**19a**

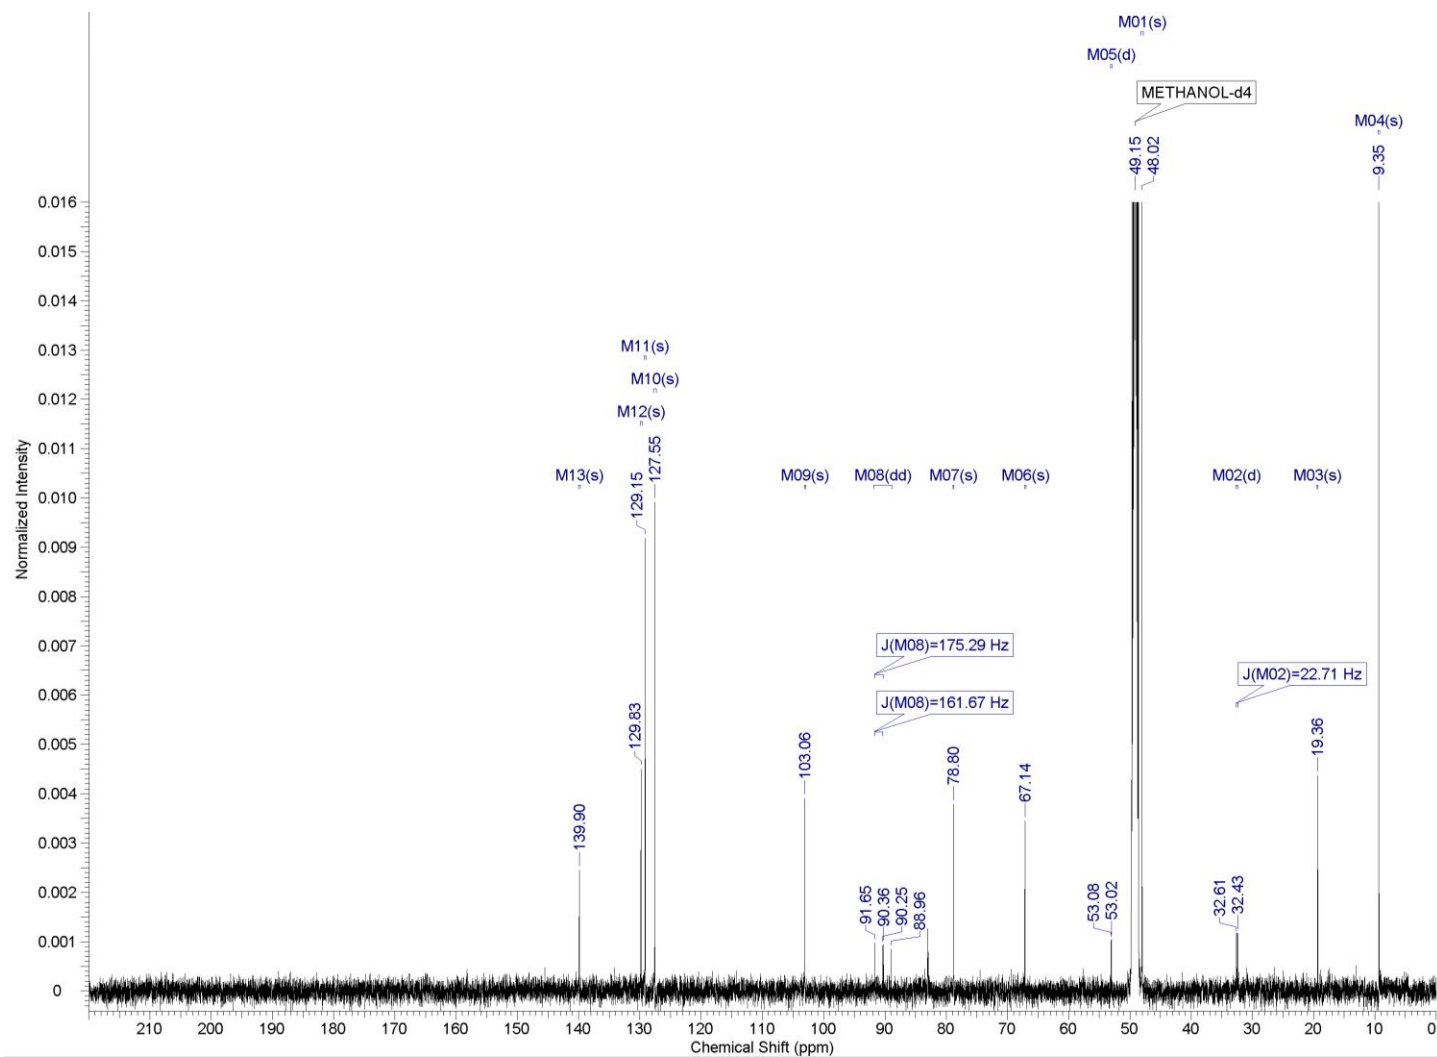

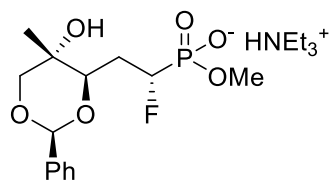

**19b**

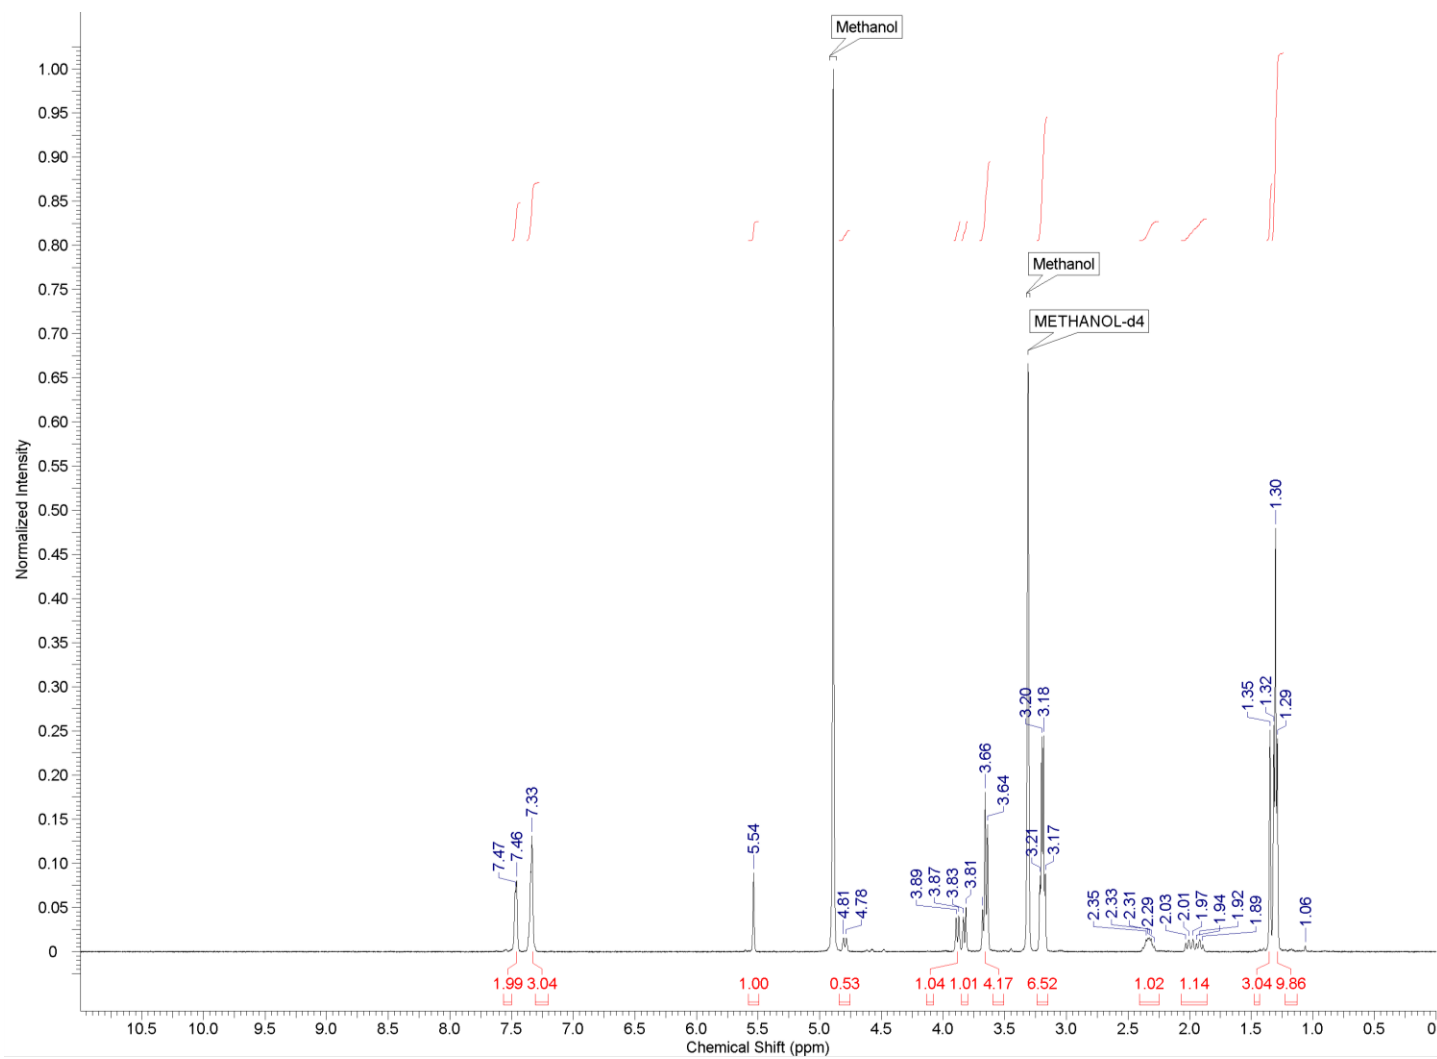

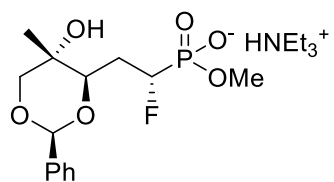

**19b**

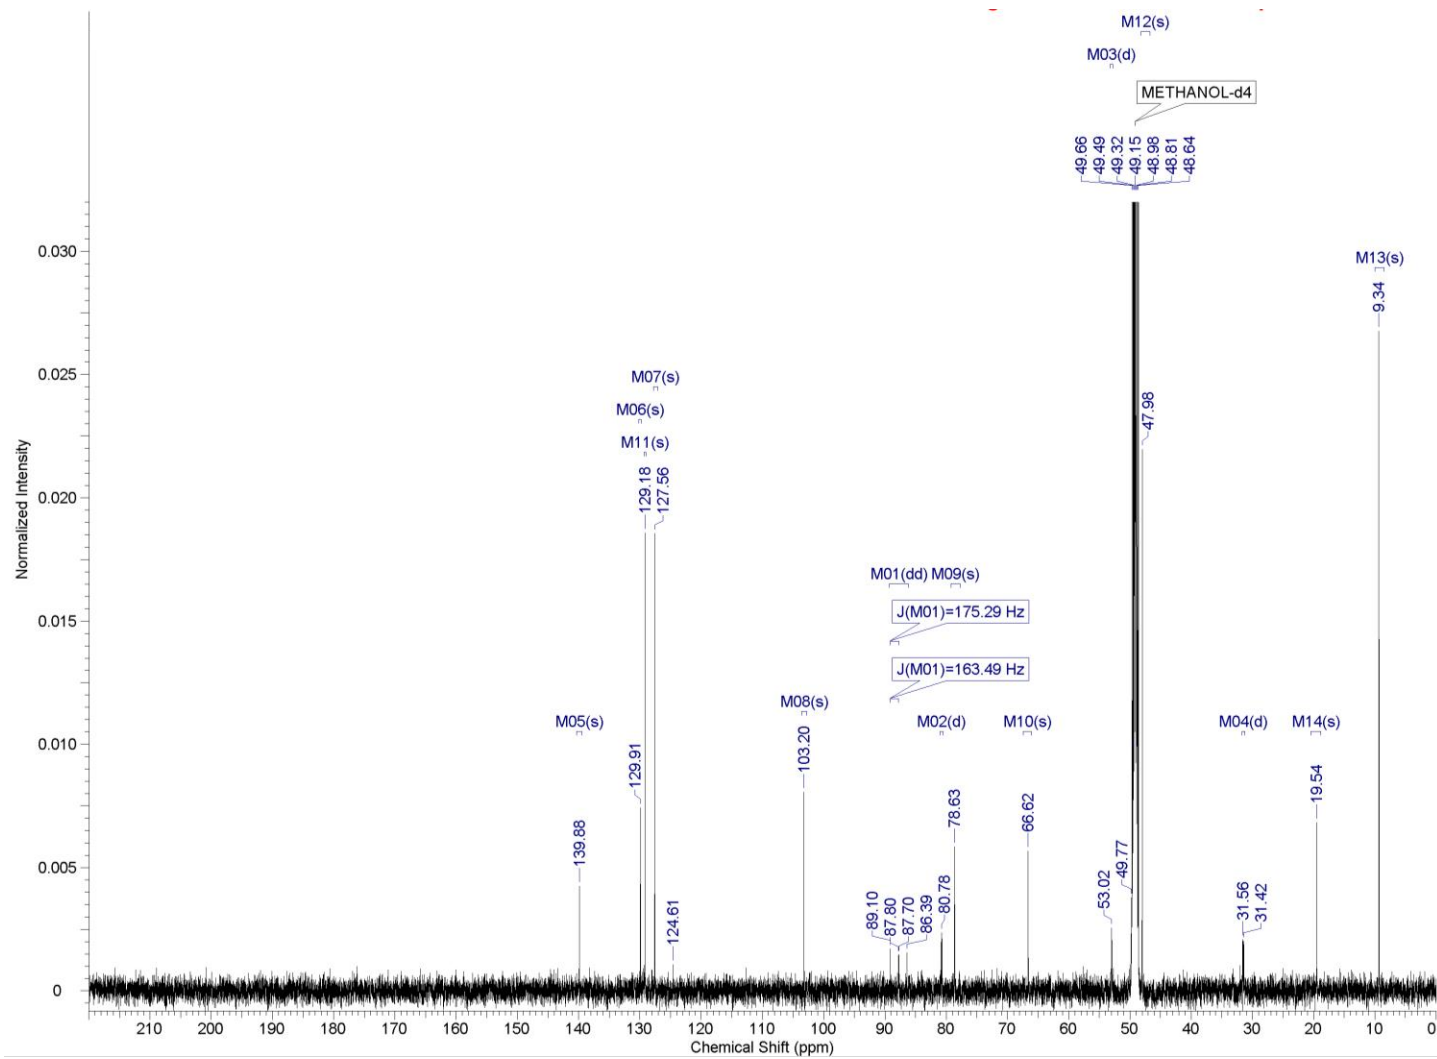

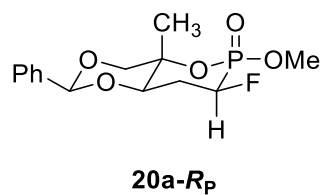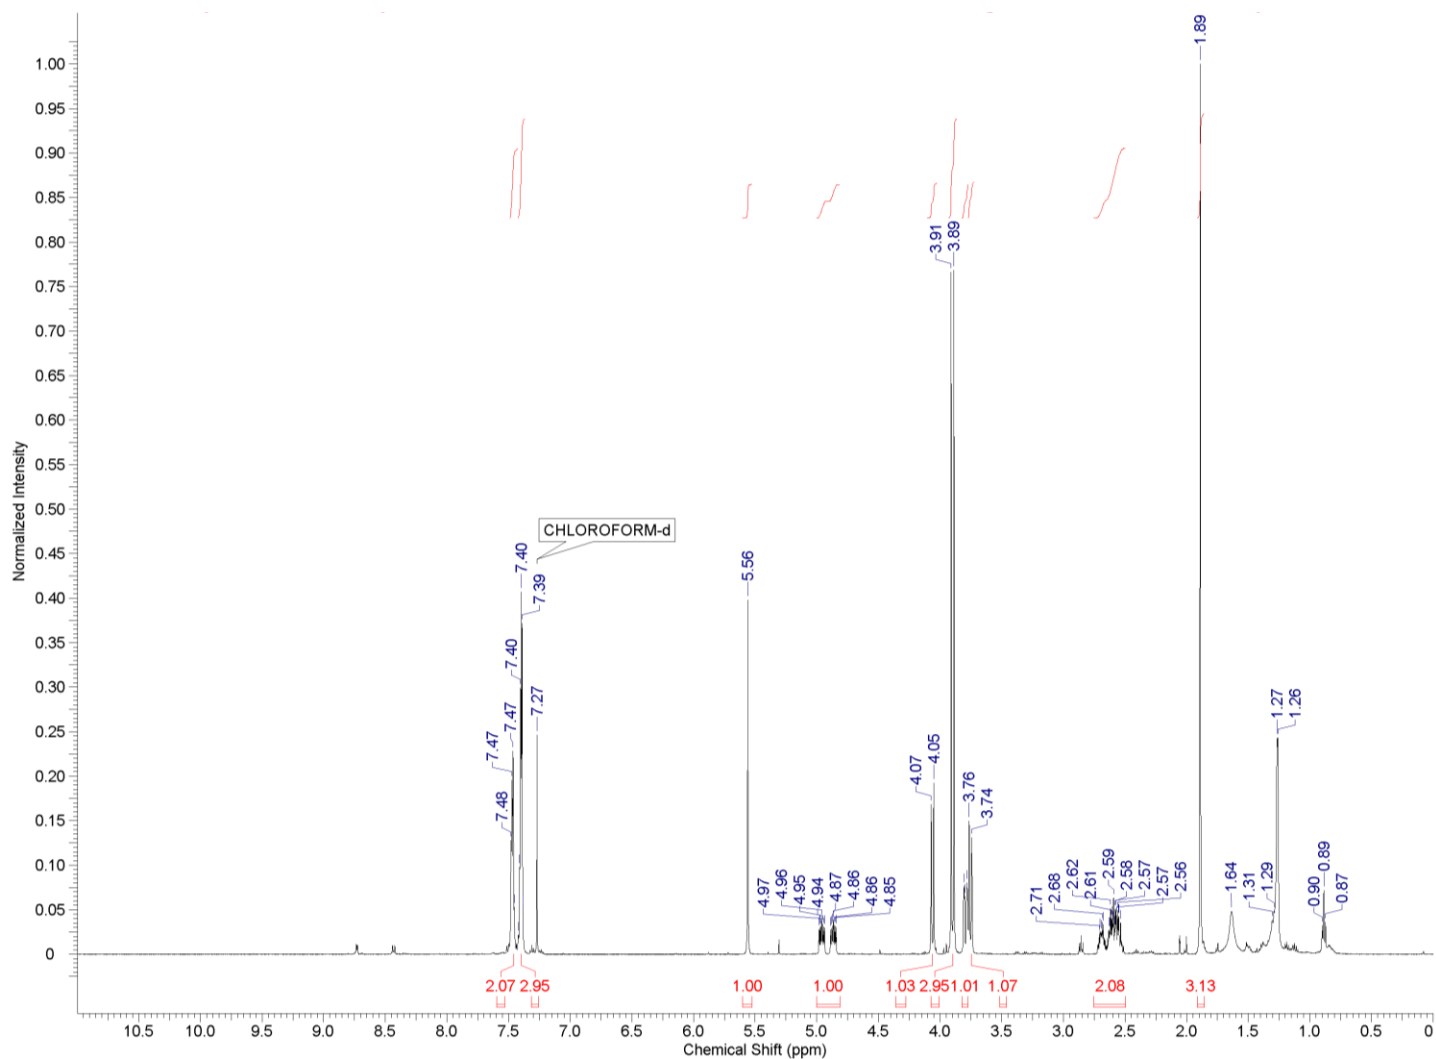

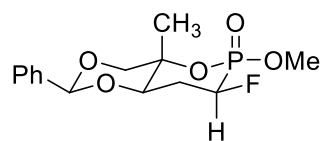

**20a-*R<sub>p</sub>***

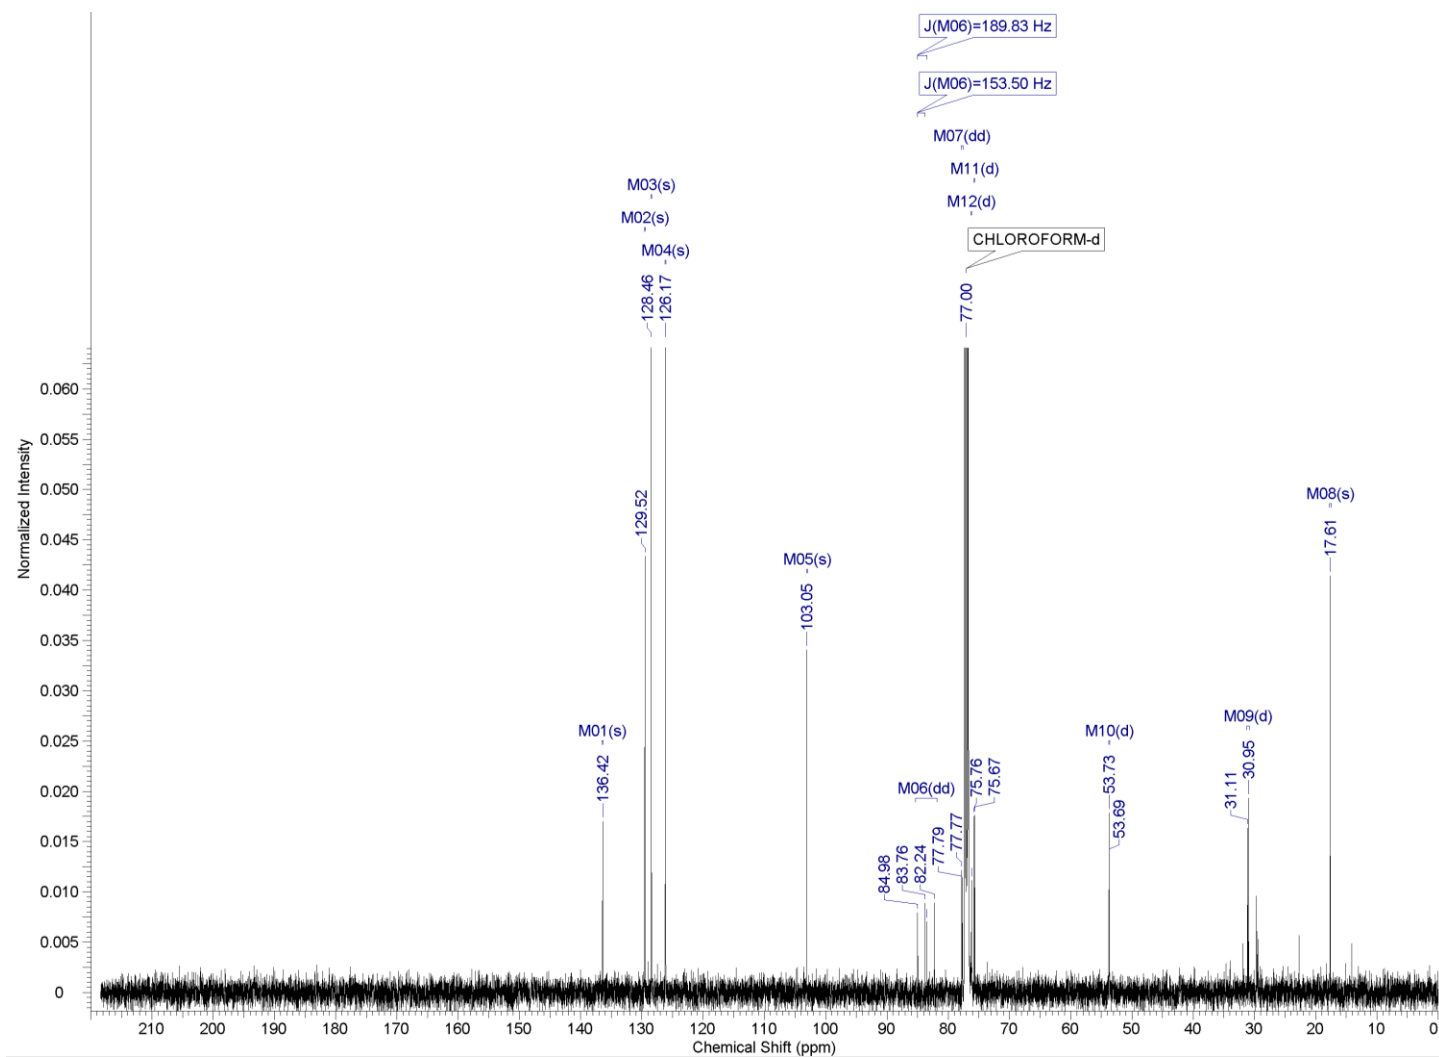

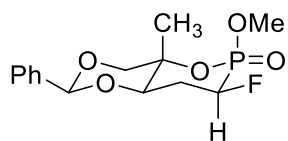

**20a-S<sub>p</sub>**

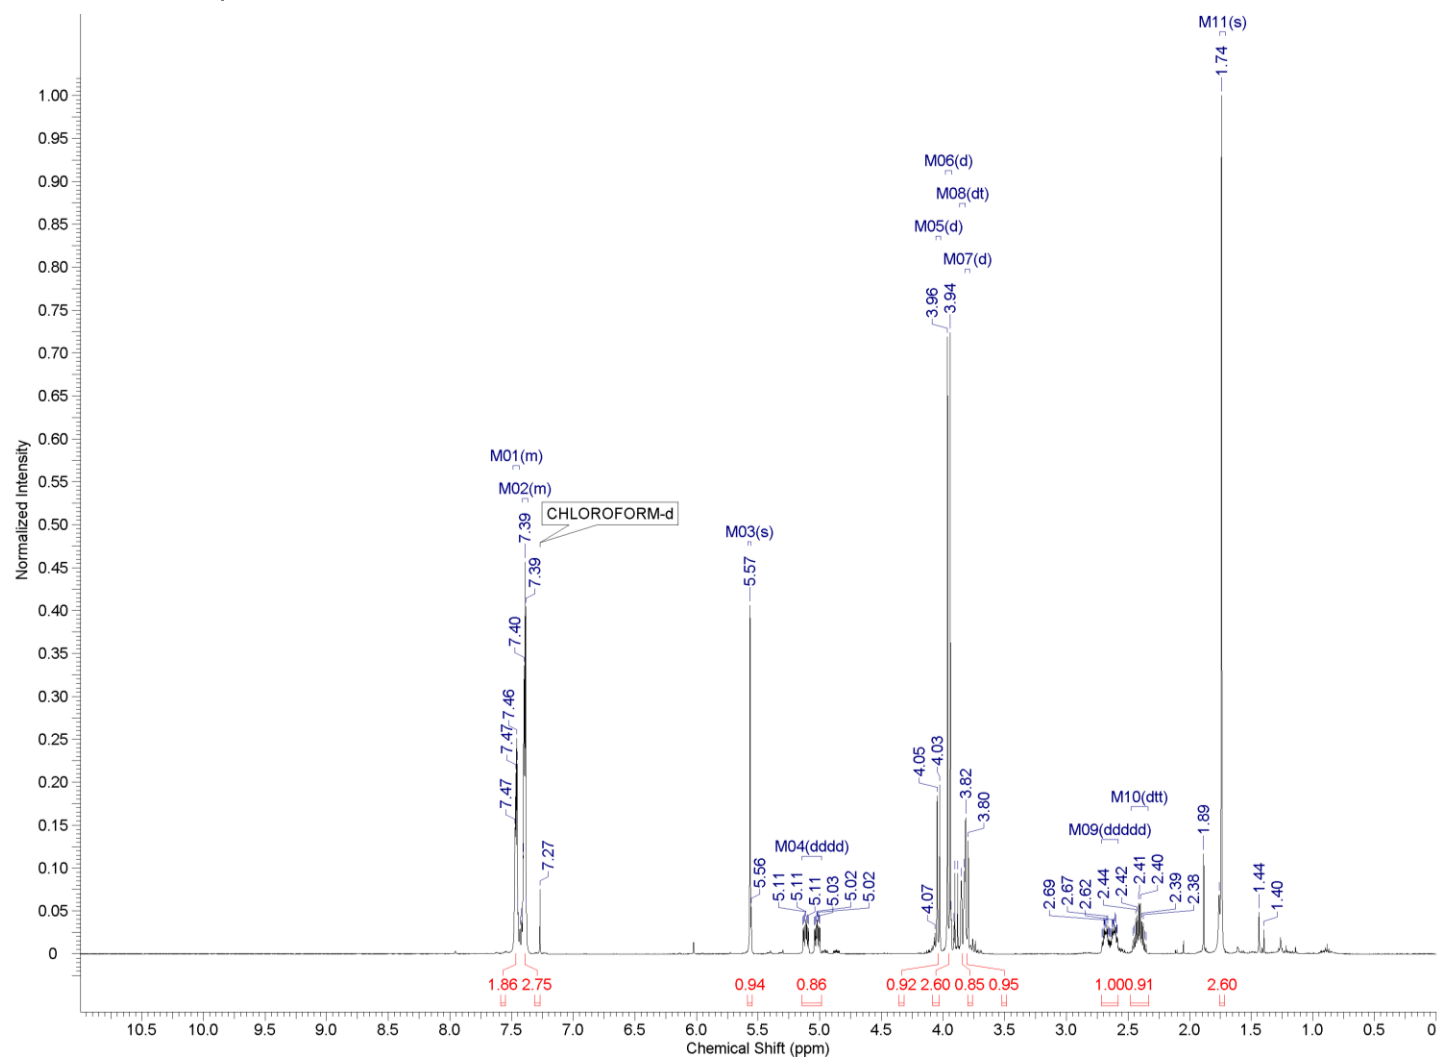

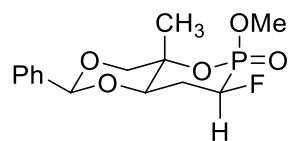

**20a-S<sub>p</sub>**

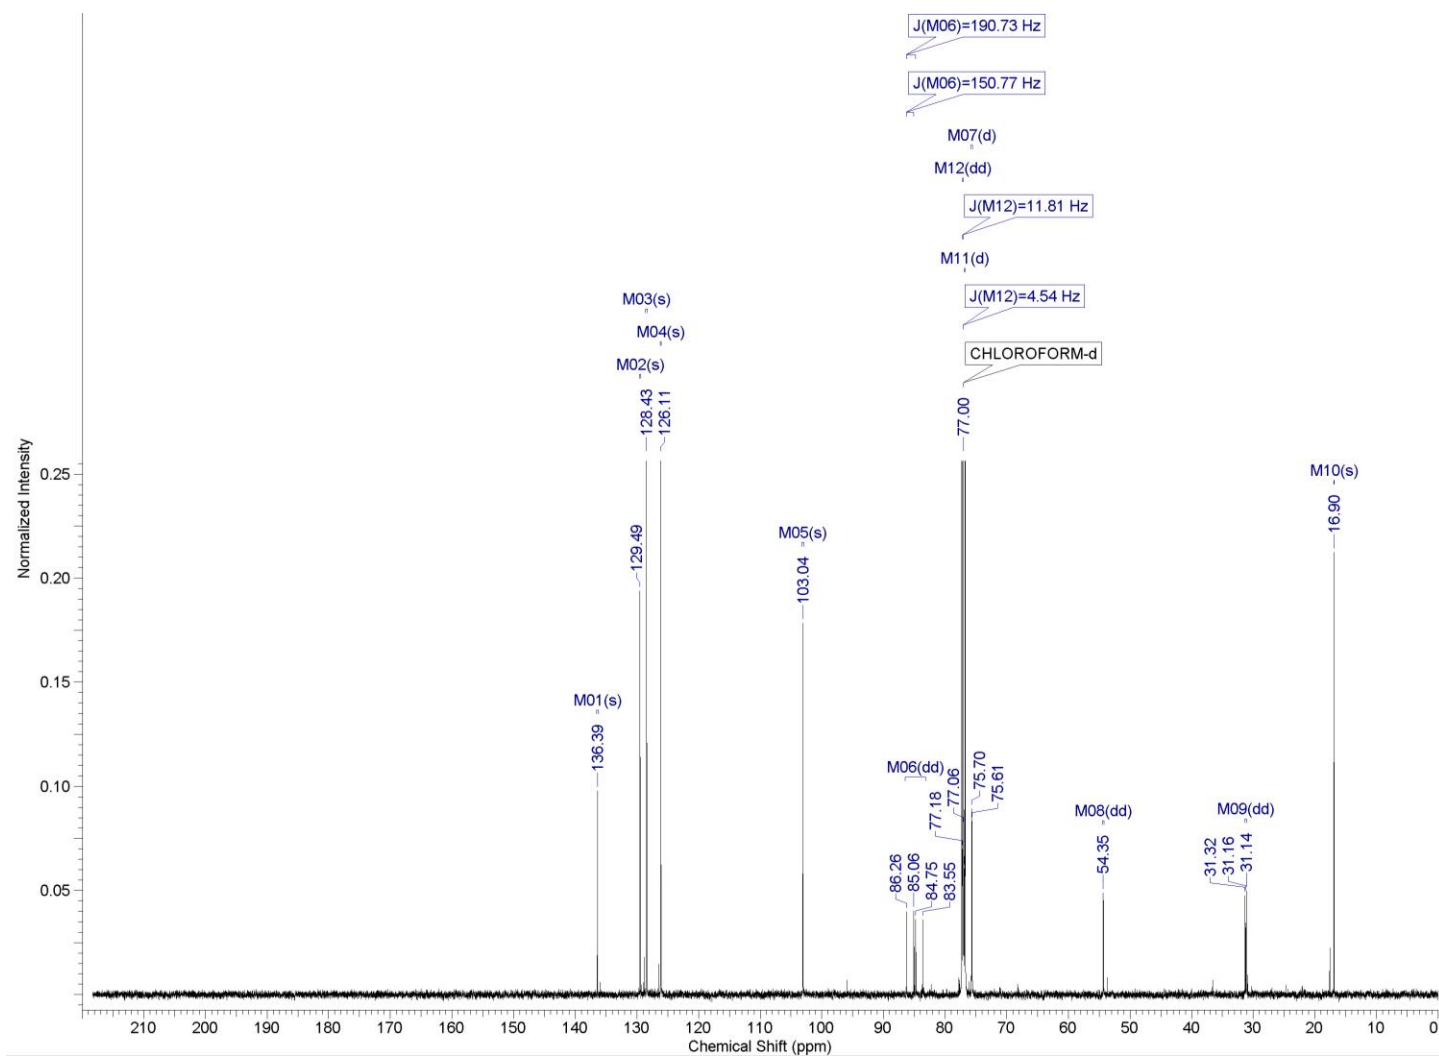

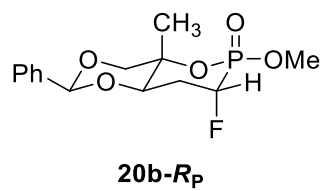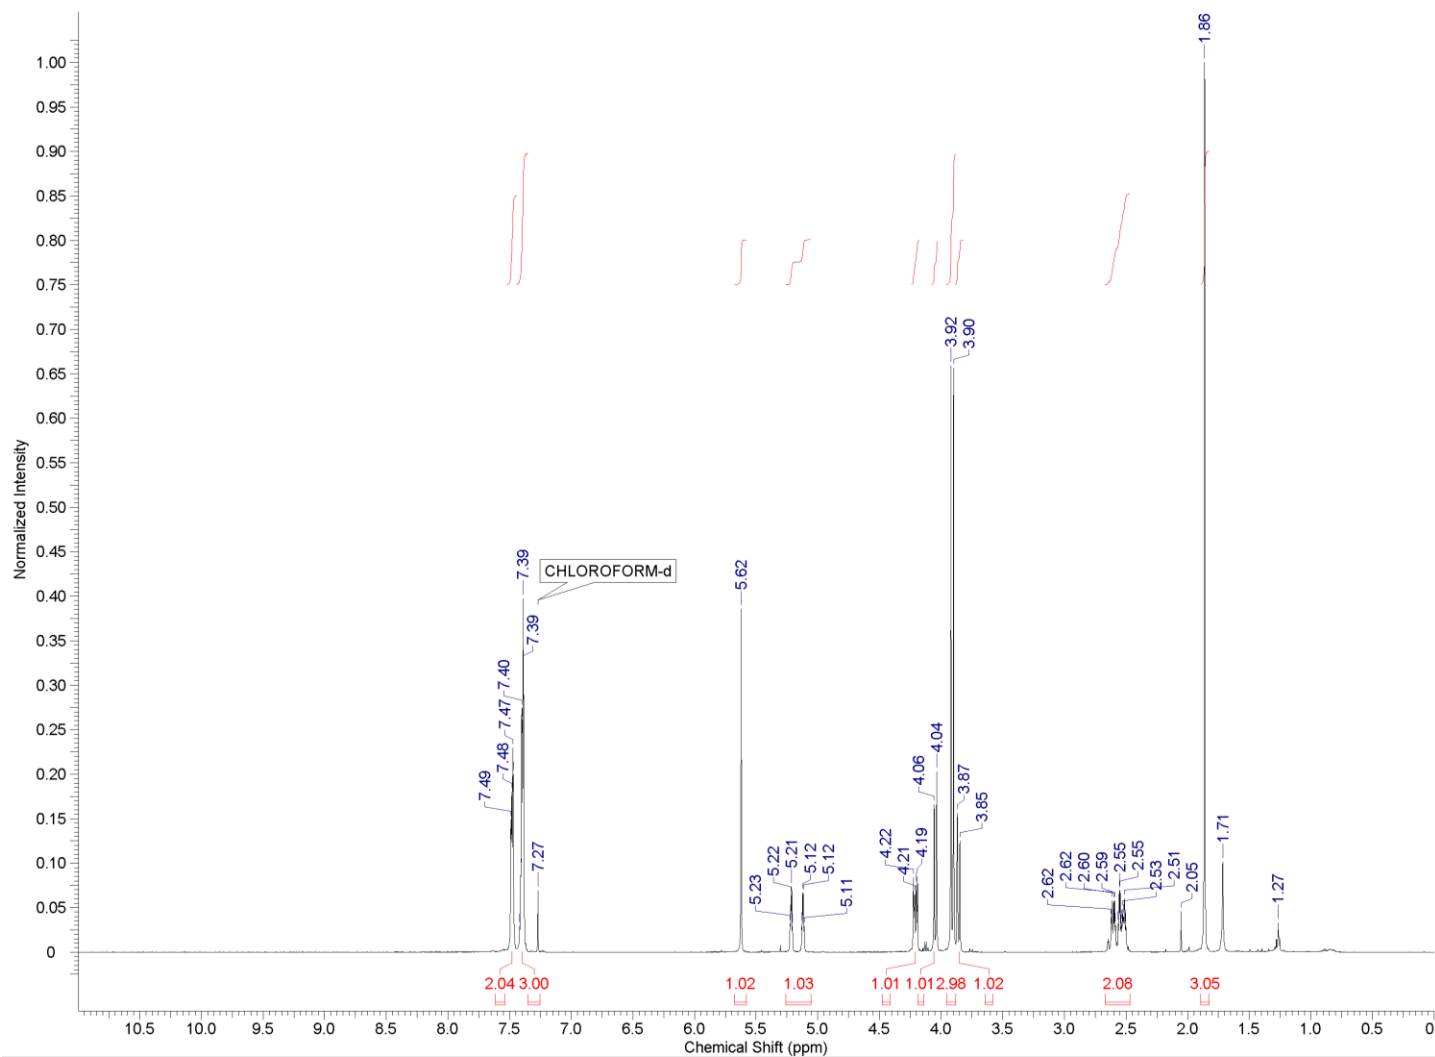

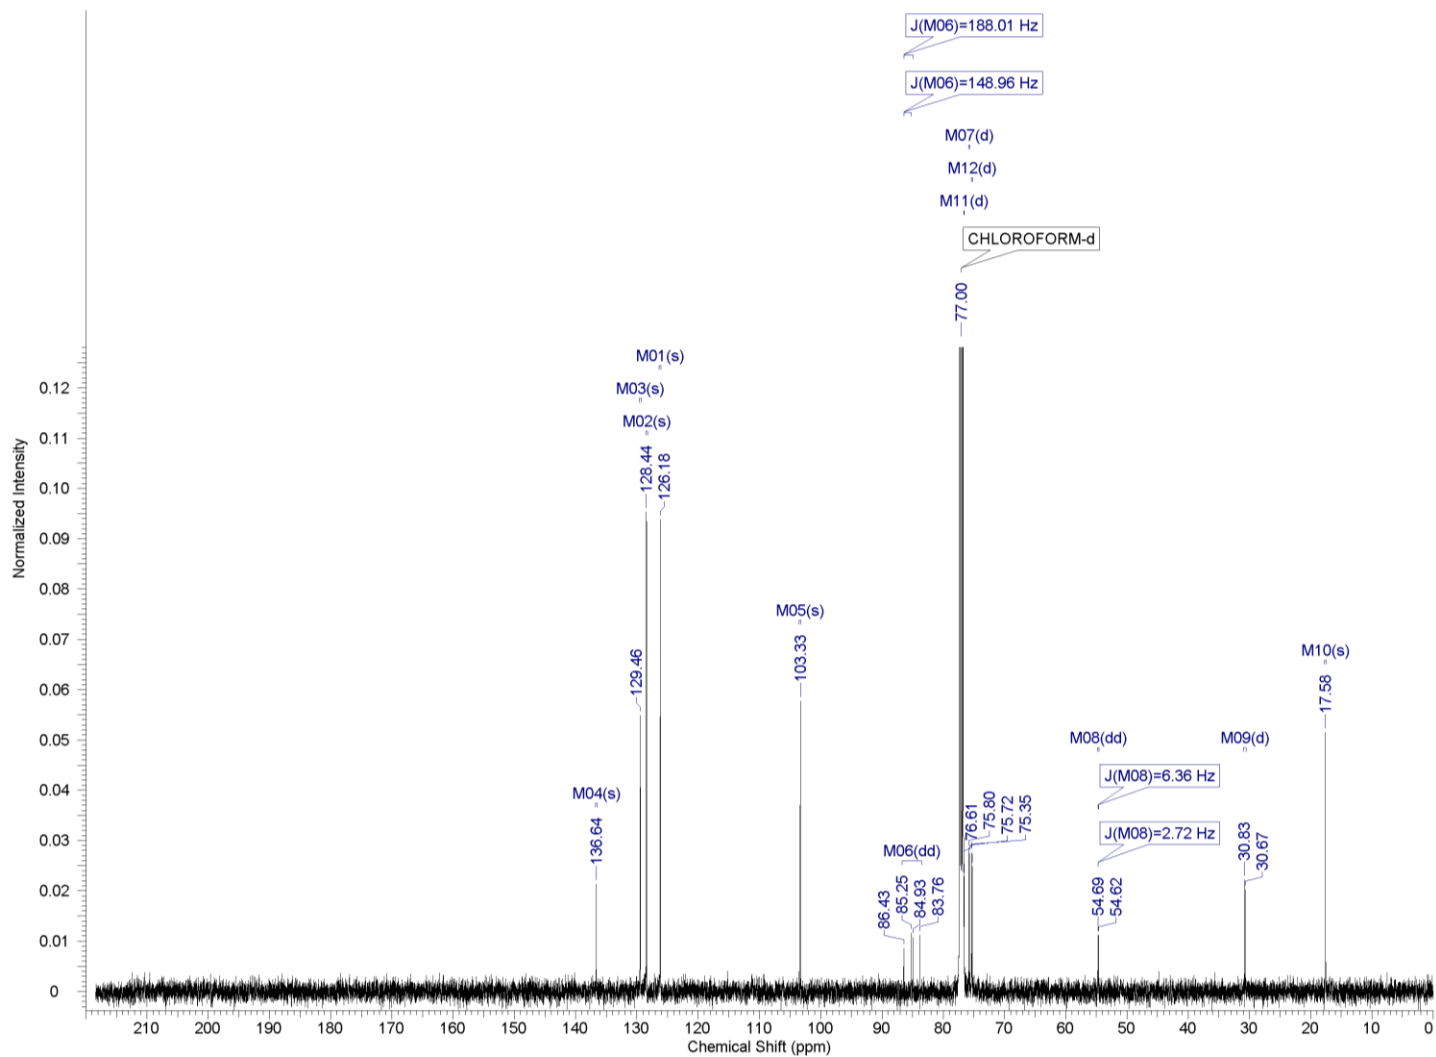

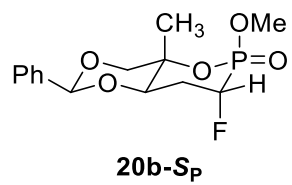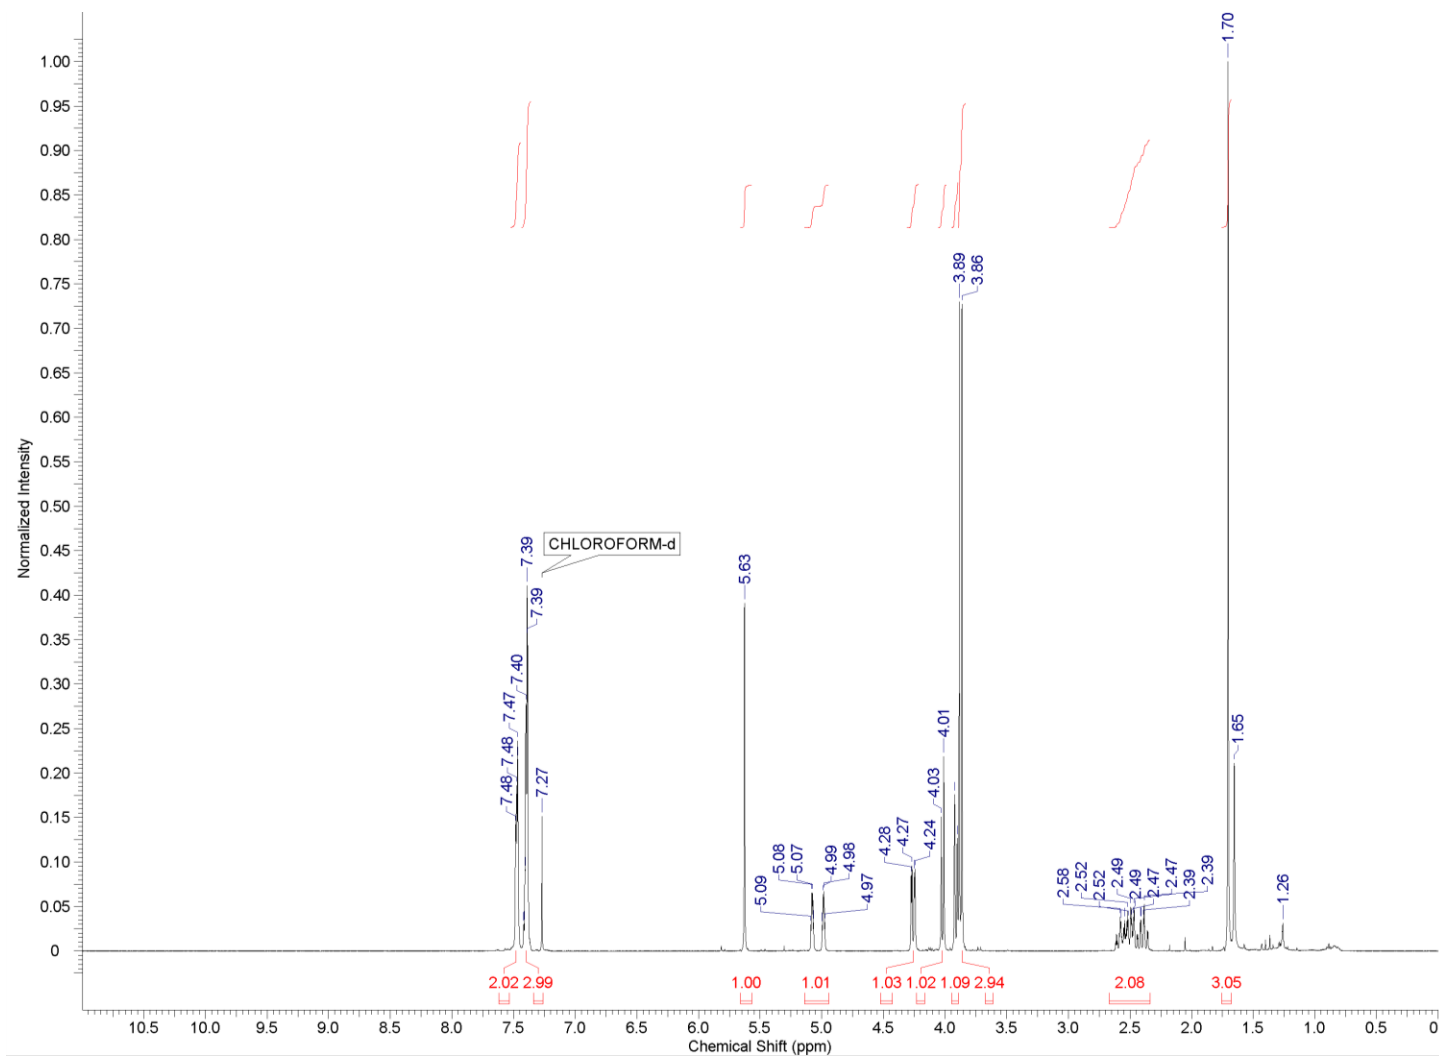

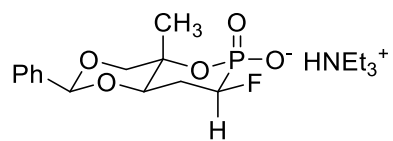

**21a**

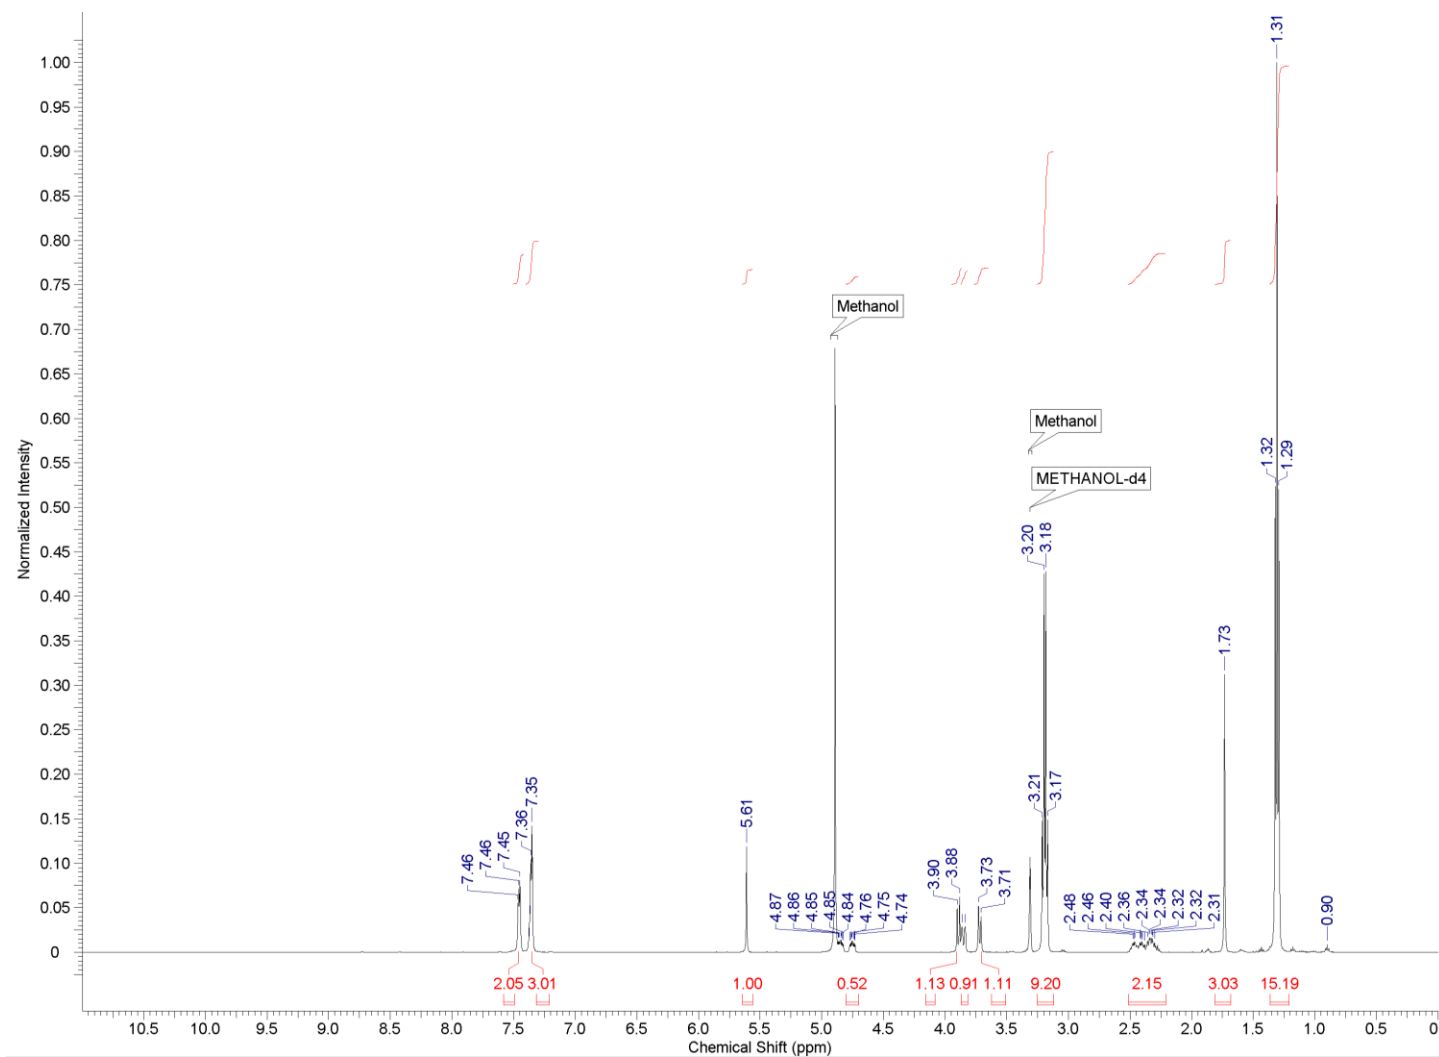

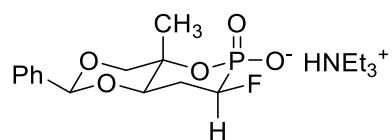

**21a**

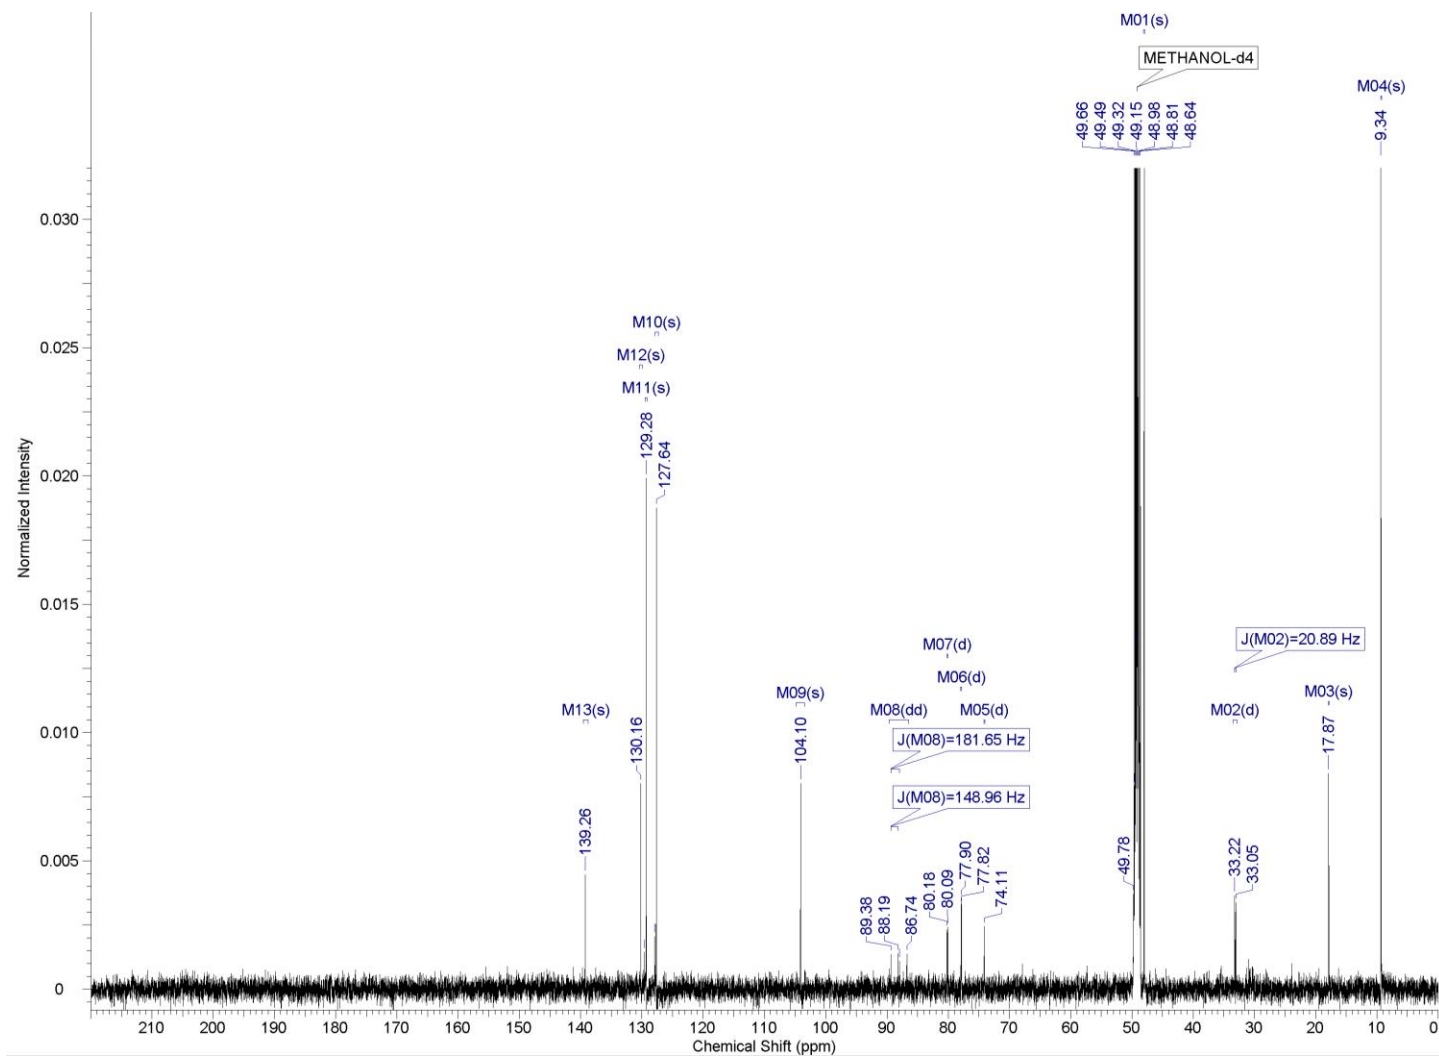

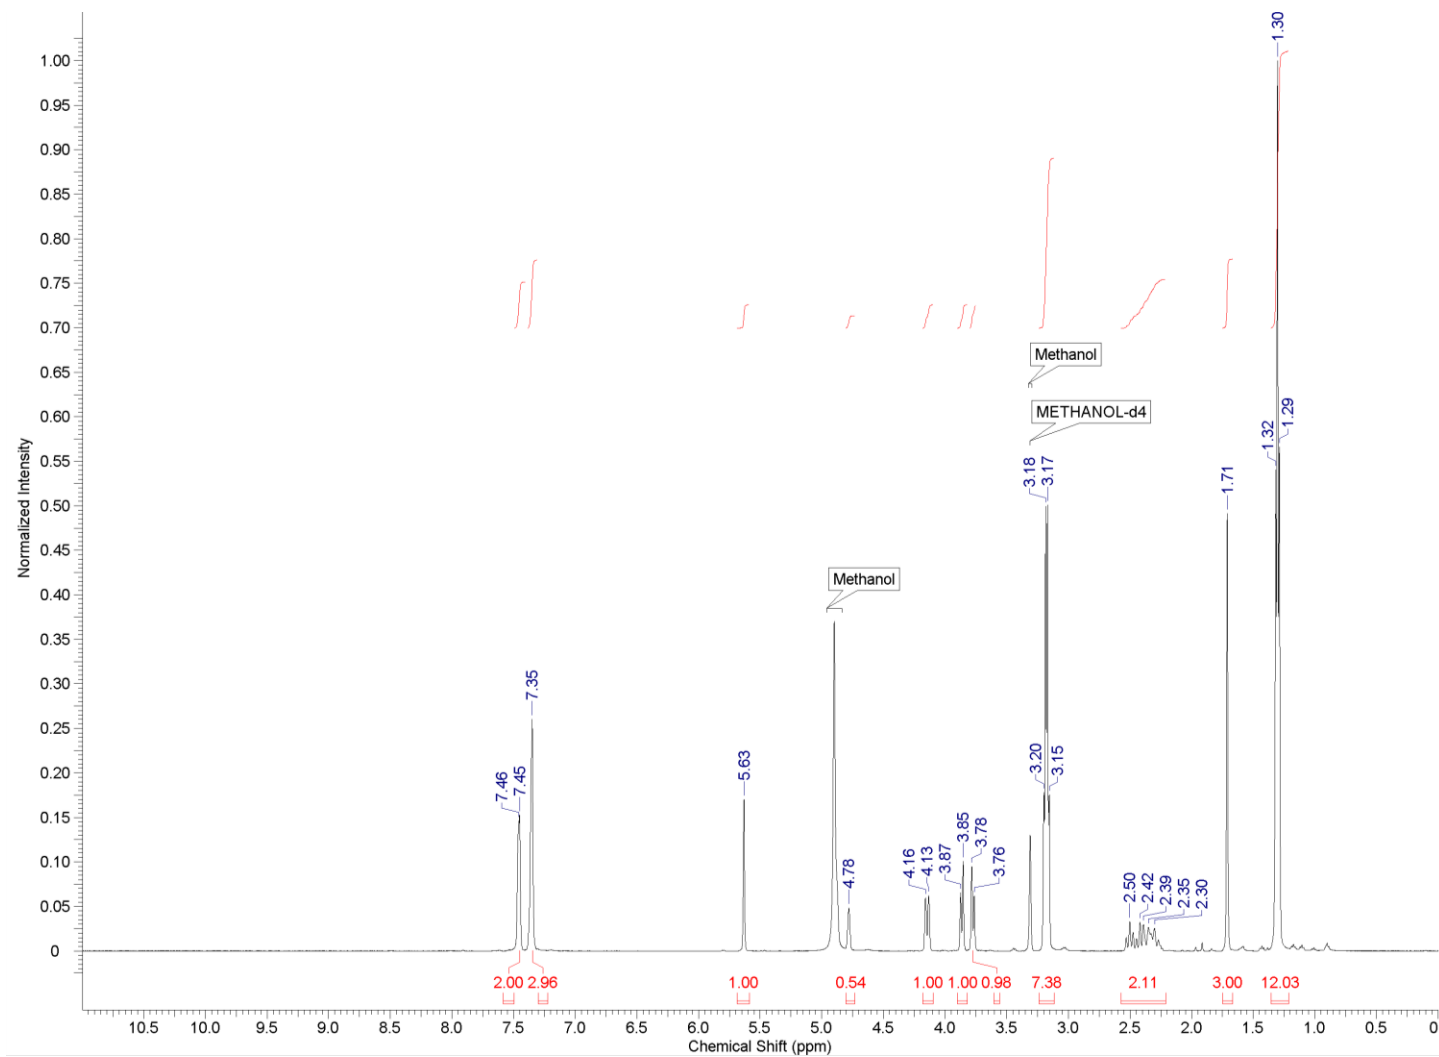

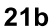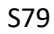

Supplement: Supplementary file 1 [file 11915534]
